# Supplementary material for: Gerberdriasins A–F, six undescribed coumarin derivatives from Gerbera anandria (Linn) Sch-Bip and their protective effects on scopolamine-induced injury in PC12 cells
Source: Royal Society of Chemistry journal article supplement (doi:10.1039/d2ra03166c), 2022-01-01
Supplement: d2ra03166c1.pdf [file d2ra03166c1.pdf]

## Supporting information

### **Gerberdriasins A–F, six undescribed coumarin derivatives from *Gerbera anandria* (Linn) Sch-Bip with their protective effects on scopolamine-induced PC12 cells**

Zhi-li Wu<sup>a,b,1</sup>, Ze-shi Sun<sup>a,1</sup>, Jia-yu Li<sup>a</sup>, Yong-xun Yang<sup>c</sup>, Xian-peng Zu<sup>a</sup>, Hui-liang Li<sup>a,\*</sup>, Wei-dong Zhang<sup>a,b\*</sup>

#### **Affiliation**

<sup>a</sup> School of Pharmacy, Second Military Medical University, Shanghai 200433, P.R. China

<sup>b</sup> School of Traditional Chinese Pharmacy, China Pharmaceutical University, Nanjing, Jiangsu 211198, P.R.

China

<sup>c</sup> School of Animal Science, Xichang College, Xichang, Sichuan 615000, P.R. China

# Contents

|                                                                                                                    |    |
|--------------------------------------------------------------------------------------------------------------------|----|
| Figure S1. HRESIMS spectrum of <i>Gerberdriasin A (1)</i> .....                                                    | 5  |
| Figure S2. IR spectrum of <i>Gerberdriasin A (1)</i> in CH <sub>3</sub> OH .....                                   | 6  |
| Figure S3. OR Value of <i>Gerberdriasin A (1)</i> in CH <sub>3</sub> OH .....                                      | 7  |
| Figure S4. CD spectra of <i>Gerberdriasin A (1)</i> in CH <sub>3</sub> OH .....                                    | 8  |
| Figure S5. <sup>1</sup> H- NMR spectrum of <i>Gerberdriasin A (1)</i> in CD <sub>3</sub> OD.....                   | 9  |
| Figure S6. <sup>13</sup> C NMR spectrum of <i>Gerberdriasin A (1)</i> in CD <sub>3</sub> OD .....                  | 10 |
| Figure S7. DEPT-135 NMR spectrum of <i>Gerberdriasin A (1)</i> in CD <sub>3</sub> OD.....                          | 11 |
| Figure S8. <sup>1</sup> H- <sup>1</sup> H COSY spectrum of <i>Gerberdriasin A (1)</i> in CD <sub>3</sub> OD.....   | 12 |
| Figure S9. HSQC spectrum of <i>Gerberdriasin A (1)</i> in CD <sub>3</sub> OD.....                                  | 13 |
| Figure S10. HMBC spectrum of <i>Gerberdriasin A (1)</i> in CD <sub>3</sub> OD.....                                 | 14 |
| Figure S11. NOESY spectrum of <i>Gerberdriasin A (1)</i> in CD <sub>3</sub> OD.....                                | 15 |
| Figure S12. HRESIMS spectrum of <i>Gerberdriasin B (2)</i> .....                                                   | 16 |
| Figure S13. IR Value of <i>Gerberdriasin B (2)</i> in CH <sub>3</sub> OH .....                                     | 17 |
| Figure S14. OR Value of <i>Gerberdriasin B (2)</i> in CH <sub>3</sub> OH.....                                      | 18 |
| Figure S15. CD spectra of <i>Gerberdriasin B (2)</i> in CH <sub>3</sub> OH .....                                   | 19 |
| Figure S16. <sup>1</sup> H NMR spectrum of <i>Gerberdriasin B (2)</i> in CD <sub>3</sub> OD .....                  | 20 |
| Figure S17. <sup>13</sup> C NMR spectrum of <i>Gerberdriasin B (2)</i> in CD <sub>3</sub> OD .....                 | 21 |
| Figure S18. DEPT-135 NMR spectrum of <i>Gerberdriasin B (2)</i> in CD <sub>3</sub> OD .....                        | 22 |
| Figure S19. <sup>1</sup> H- <sup>1</sup> H COSY spectrum of <i>Gerberdriasin B (2)</i> in CD <sub>3</sub> OD ..... | 23 |
| Figure S20. HSQC spectrum of <i>Gerberdriasin B (2)</i> in CD <sub>3</sub> OD .....                                | 24 |
| Figure S21. HMBC spectrum of <i>Gerberdriasin B (2)</i> in CD <sub>3</sub> OD.....                                 | 25 |
| Figure S22. NOESY spectrum of <i>Gerberdriasin B (2)</i> in CD <sub>3</sub> OD .....                               | 26 |
| Figure S23. HRESIMS spectrum of <i>Gerberdriasin C (3)</i> in CH <sub>3</sub> OH .....                             | 27 |
| Figure S24. IR Value of <i>Gerberdriasin C (3)</i> in CH <sub>3</sub> OH .....                                     | 28 |
| Figure S25. OR Value of <i>Gerberdriasin C (3)</i> in CH <sub>3</sub> OH.....                                      | 29 |
| Figure S26. CD spectra of <i>Vlasouliode C (3)</i> in CH <sub>3</sub> OH.....                                      | 30 |
| Figure S27. <sup>1</sup> H NMR spectrum of <i>Gerberdriasin C (3)</i> in CD <sub>3</sub> OD .....                  | 31 |
| Figure S28. <sup>13</sup> C NMR spectrum of <i>Gerberdriasin C (3)</i> in CD <sub>3</sub> OD .....                 | 32 |
| Figure S29. DEPT-135 NMR spectrum of <i>Gerberdriasin C (3)</i> in CD <sub>3</sub> OD .....                        | 33 |
| Figure S30. <sup>1</sup> H- <sup>1</sup> H COSY spectrum of <i>Gerberdriasin C (3)</i> in CD <sub>3</sub> OD ..... | 34 |
| Figure S31. HSQC spectrum of <i>Gerberdriasin C (3)</i> in CD <sub>3</sub> OD .....                                | 35 |
| Figure S32. HMBC spectrum of <i>Gerberdriasin C (3)</i> in CD <sub>3</sub> OD.....                                 | 36 |

|                                                                                                                    |    |
|--------------------------------------------------------------------------------------------------------------------|----|
| Figure S33. NOESY spectrum of <i>Gerberdriasin C</i> (3) in CD <sub>3</sub> OD .....                               | 37 |
| Figure S34. HRESIMS spectrum of <i>Gerberdriasin D</i> (4) .....                                                   | 38 |
| Figure S35. IR Value of <i>Gerberdriasin D</i> (4) in CH <sub>3</sub> OH .....                                     | 39 |
| Figure S36. OR Value of <i>Gerberdriasin D</i> (4) in CH <sub>3</sub> OH .....                                     | 40 |
| Figure S37. CD spectra of <i>Gerberdriasin D</i> (4) in CH <sub>3</sub> OH .....                                   | 41 |
| Figure S38. <sup>1</sup> H NMR spectrum of <i>Gerberdriasin D</i> (4) in CD <sub>3</sub> OD .....                  | 42 |
| Figure S39. <sup>13</sup> C NMR spectrum of <i>Gerberdriasin D</i> (4) in CD <sub>3</sub> OD .....                 | 43 |
| Figure S40. DEPT-135 NMR spectrum of <i>Gerberdriasin D</i> (4) in CD <sub>3</sub> OD .....                        | 44 |
| Figure S41. <sup>1</sup> H- <sup>1</sup> H COSY spectrum of <i>Gerberdriasin D</i> (4) in CD <sub>3</sub> OD ..... | 45 |
| Figure S42. HSQC spectrum of <i>Gerberdriasin D</i> (4) in CD <sub>3</sub> OD .....                                | 46 |
| Figure S43 HMBC spectrum of <i>Gerberdriasin D</i> (4) in CD <sub>3</sub> OD .....                                 | 47 |
| Figure S44. NOESY spectrum of <i>Gerberdriasin D</i> (4) in CD <sub>3</sub> OD .....                               | 48 |
| Figure S45. HRESIMS spectrum of <i>Gerberdriasin E</i> (5) .....                                                   | 49 |
| Figure S46. IR Value of <i>Gerberdriasin E</i> (5) in CH <sub>3</sub> OH .....                                     | 50 |
| Figure S47. OR Value of <i>Gerberdriasin E</i> (5) in CH <sub>3</sub> OH .....                                     | 51 |
| Figure S48. CD spectra of <i>Gerberdriasin E</i> (5) in CH <sub>3</sub> OH .....                                   | 52 |
| Figure S49. <sup>1</sup> H NMR spectrum of <i>Gerberdriasin E</i> (5) in CD <sub>3</sub> OD .....                  | 53 |
| Figure S50. <sup>13</sup> C NMR spectrum of <i>Gerberdriasin E</i> (5) in CD <sub>3</sub> OD .....                 | 54 |
| Figure S51. DEPT-135 NMR spectrum of <i>Gerberdriasin E</i> (5) in CD <sub>3</sub> OD .....                        | 55 |
| Figure S52. <sup>1</sup> H- <sup>1</sup> H COSY spectrum of <i>Gerberdriasin E</i> (5) in CD <sub>3</sub> OD ..... | 56 |
| Figure S53. HSQC spectrum of <i>Gerberdriasin E</i> (5) in CD <sub>3</sub> OD .....                                | 57 |
| Figure S54 HMBC spectrum of <i>Gerberdriasin E</i> (5) in CD <sub>3</sub> OD .....                                 | 58 |
| Figure S55. NOESY spectrum of <i>Gerberdriasin E</i> (5) in CD <sub>3</sub> OD .....                               | 59 |
| Figure S56. HRESIMS spectrum of <i>Gerberdriasin F</i> (6) .....                                                   | 60 |
| Figure S57. IR Value of <i>Gerberdriasin F</i> (6) in CH <sub>3</sub> OH .....                                     | 61 |
| Figure S58. OR Value of <i>Gerberdriasin F</i> (6) in CH <sub>3</sub> OH .....                                     | 62 |
| Figure S59. CD spectra of <i>Gerberdriasin F</i> (6) in CH <sub>3</sub> OH .....                                   | 63 |
| Figure S60. <sup>1</sup> H NMR spectrum of <i>Gerberdriasin F</i> (6) in CD <sub>3</sub> OD .....                  | 64 |
| Figure S61. <sup>13</sup> C NMR spectrum of <i>Gerberdriasin F</i> (6) in CD <sub>3</sub> OD .....                 | 65 |
| Figure S62. DEPT-135 NMR spectrum of <i>Gerberdriasin F</i> (6) in CD <sub>3</sub> OD .....                        | 66 |
| Figure S63. <sup>1</sup> H- <sup>1</sup> H COSY spectrum of <i>Gerberdriasin F</i> (6) in CD <sub>3</sub> OD ..... | 67 |
| Figure S64. HSQC spectrum of <i>Gerberdriasin F</i> (6) in CD <sub>3</sub> OD .....                                | 68 |
| Figure S65 HMBC spectrum of <i>Gerberdriasin F</i> (6) in CD <sub>3</sub> OD .....                                 | 69 |
| Figure S66. NOESY spectrum of <i>Gerberdriasin F</i> (6) in CD <sub>3</sub> OD .....                               | 70 |
| Figure S67. Chemical shift differences ( $\Delta\delta_H$ (S-R)) between (S)-MTPA and (R)-MTPA of 1 .....          | 71 |
| Figure S68. Chemical shift differences ( $\Delta\delta_H$ (S-R)) between (S)-MTPA and (R)-MTPA of 2 .....          | 72 |

**Figure S69. Chemical shift differences ( $\Delta\delta\text{H (S-R)}$ ) between (S)-MTPA and (R)-MTPA of 3.....73**  
**Figure S70. Chemical shift differences ( $\Delta\delta\text{H (S-R)}$ ) between (S)-MTPA and (R)-MTPA of 5.....74**

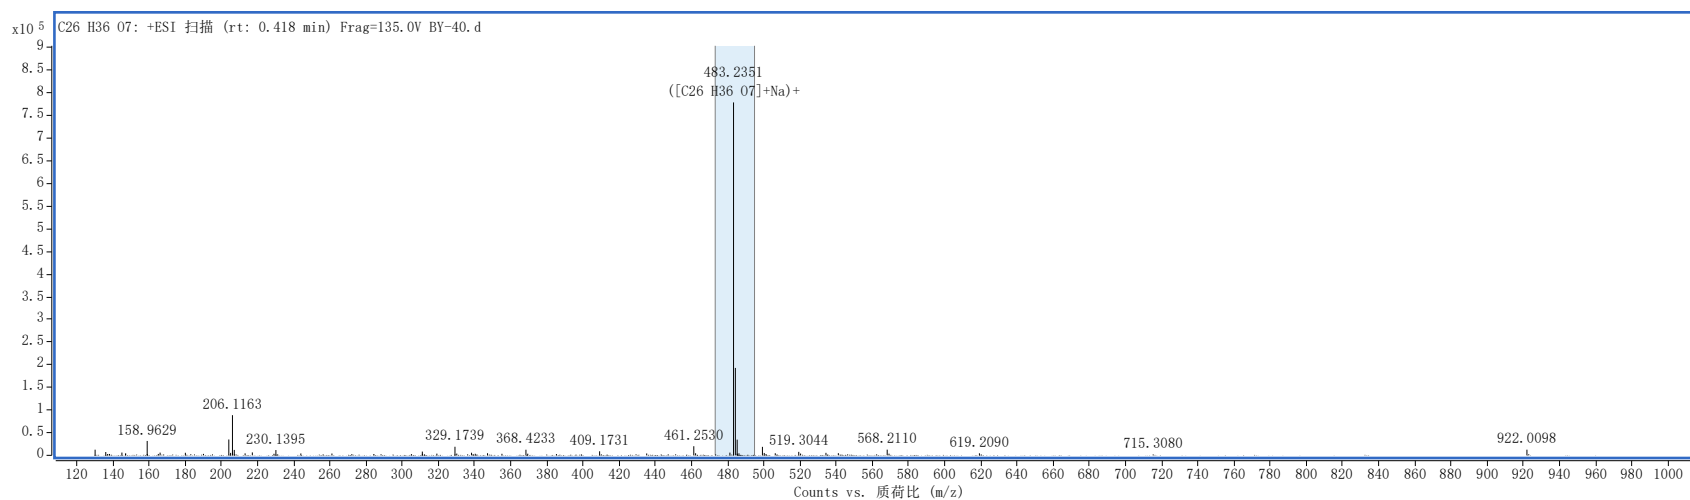

| 峰高总百分比 (Calc) | 峰高 (计算值) | 峰高百分数(计算值) | m/z (Calc) | Diff (mDa) | 峰高       | 峰高百分数 | 峰高总百分比 | m/z      | Diff (ppm) |
|---------------|----------|------------|------------|------------|----------|-------|--------|----------|------------|
| 74.5          | 749957.1 | 100        | 483.2353   | 0.2        | 779032.4 | 100   | 77.4   | 483.2351 | 0.38       |

| 最佳   | ID 来源 | 分子式        | 种类      | m/z      | 分数    | Diff (ppm) | 分数 (MFG) |
|------|-------|------------|---------|----------|-------|------------|----------|
| TRUE | MFG   | C26 H36 O7 | (M+Na)+ | 483.2351 | 96.71 | 0.74       | 96.71    |

**Figure S1. HRESIMS spectrum of *Gerberdriasins A (1)***

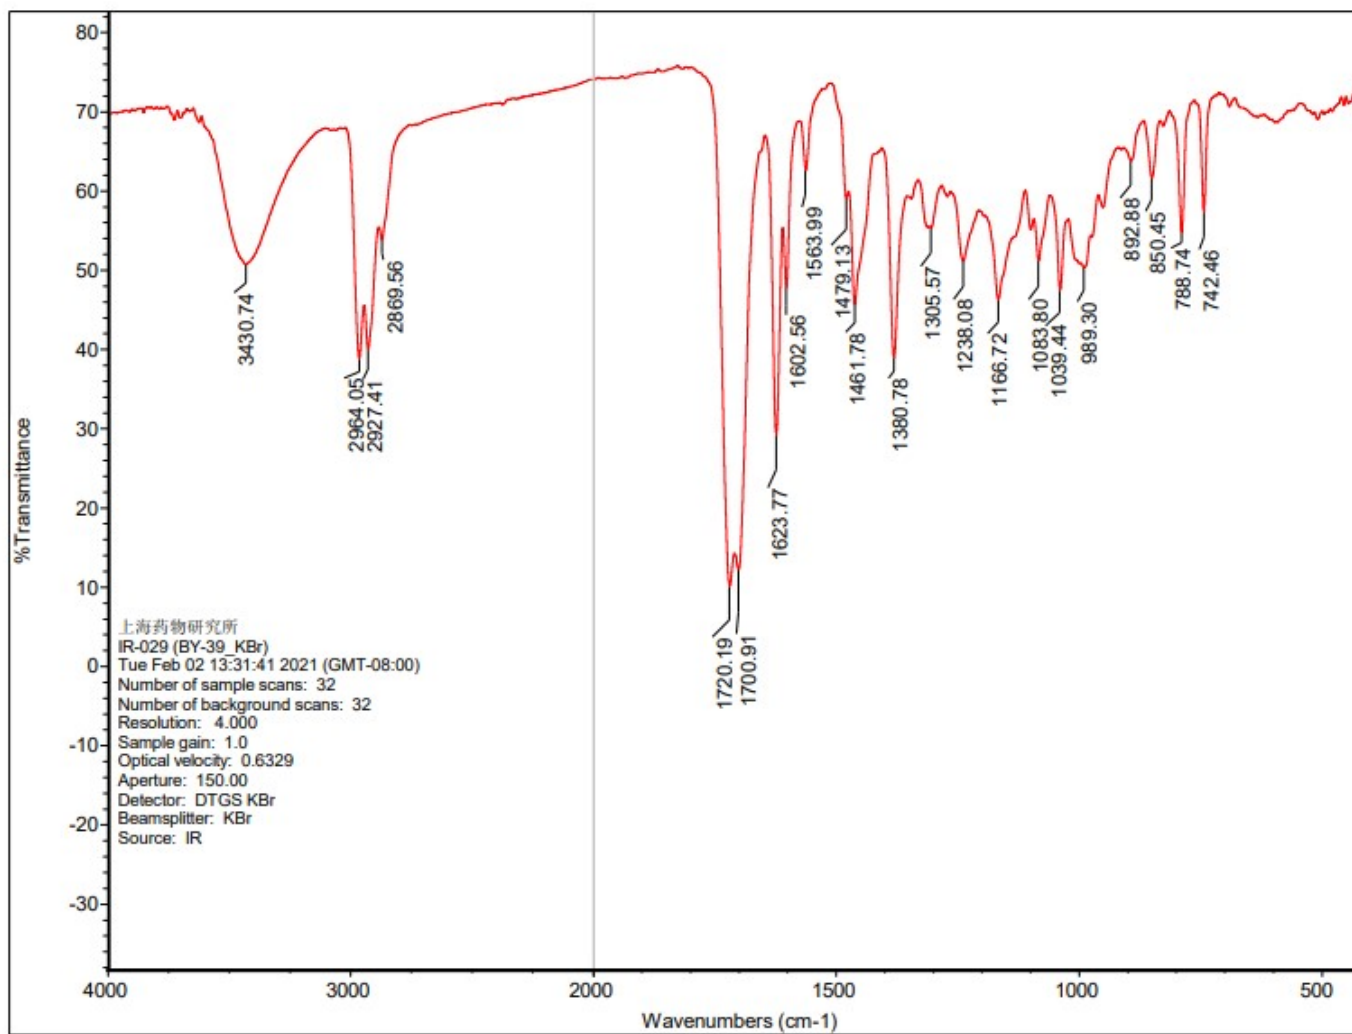

Figure S2. IR spectrum of *Gerberdriasins A (1)*

**Rudolph Research Analytical**

Thursday, 11/05/2020

This sample was measured on an Autopol VI, serial number 90079,  
manufactured by Rudolph Research Analytical, Hackettstown, NJ.

LotID : BY-39  
Set Temperature : 20.0  
Temp Corr : OFF

|          |                |                 |                |                |
|----------|----------------|-----------------|----------------|----------------|
| <b>n</b> | <b>Average</b> | <b>Std.Dev.</b> | <b>Maximum</b> | <b>Minimum</b> |
| 6        | -15.834        | 0.8335          | -15.000        | -16.667        |

| S.No | Sample ID | Time        | Result  | Scale | OR ° Arc | WLG | Lg.mm  | Conc. | Temp. | Comment |
|------|-----------|-------------|---------|-------|----------|-----|--------|-------|-------|---------|
| 1    | BY-39     | 04:12:51 PM | -16.667 | SR    | -0.010   | 589 | 100.00 | 0.060 | 20.1  |         |
| 2    | BY-39     | 04:12:57 PM | -16.667 | SR    | -0.010   | 589 | 100.00 | 0.060 | 20.1  |         |
| 3    | BY-39     | 04:13:04 PM | -15.000 | SR    | -0.009   | 589 | 100.00 | 0.060 | 20.0  |         |
| 4    | BY-39     | 04:13:10 PM | -15.000 | SR    | -0.009   | 589 | 100.00 | 0.060 | 20.0  |         |
| 5    | BY-39     | 04:13:16 PM | -15.000 | SR    | -0.009   | 589 | 100.00 | 0.060 | 20.0  |         |
| 6    | BY-39     | 04:13:23 PM | -16.667 | SR    | -0.010   | 589 | 100.00 | 0.060 | 20.0  |         |

\_\_\_\_\_  
Signature

**Figure S3. OR Value of *Gerberdriasins A (1)* in CH<sub>3</sub>OH**

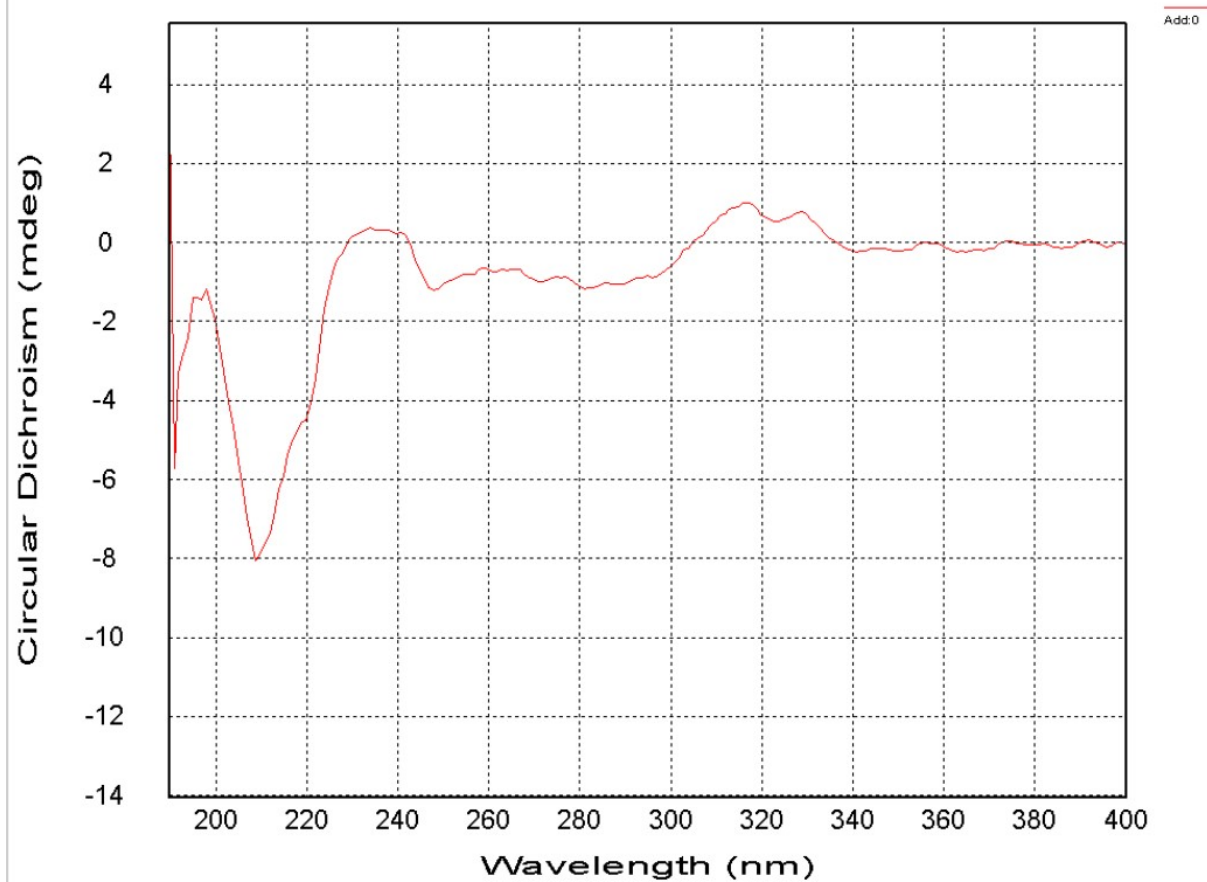

Figure S4. CD spectra of *Gerberdriasins A (1)* in CH<sub>3</sub>OH



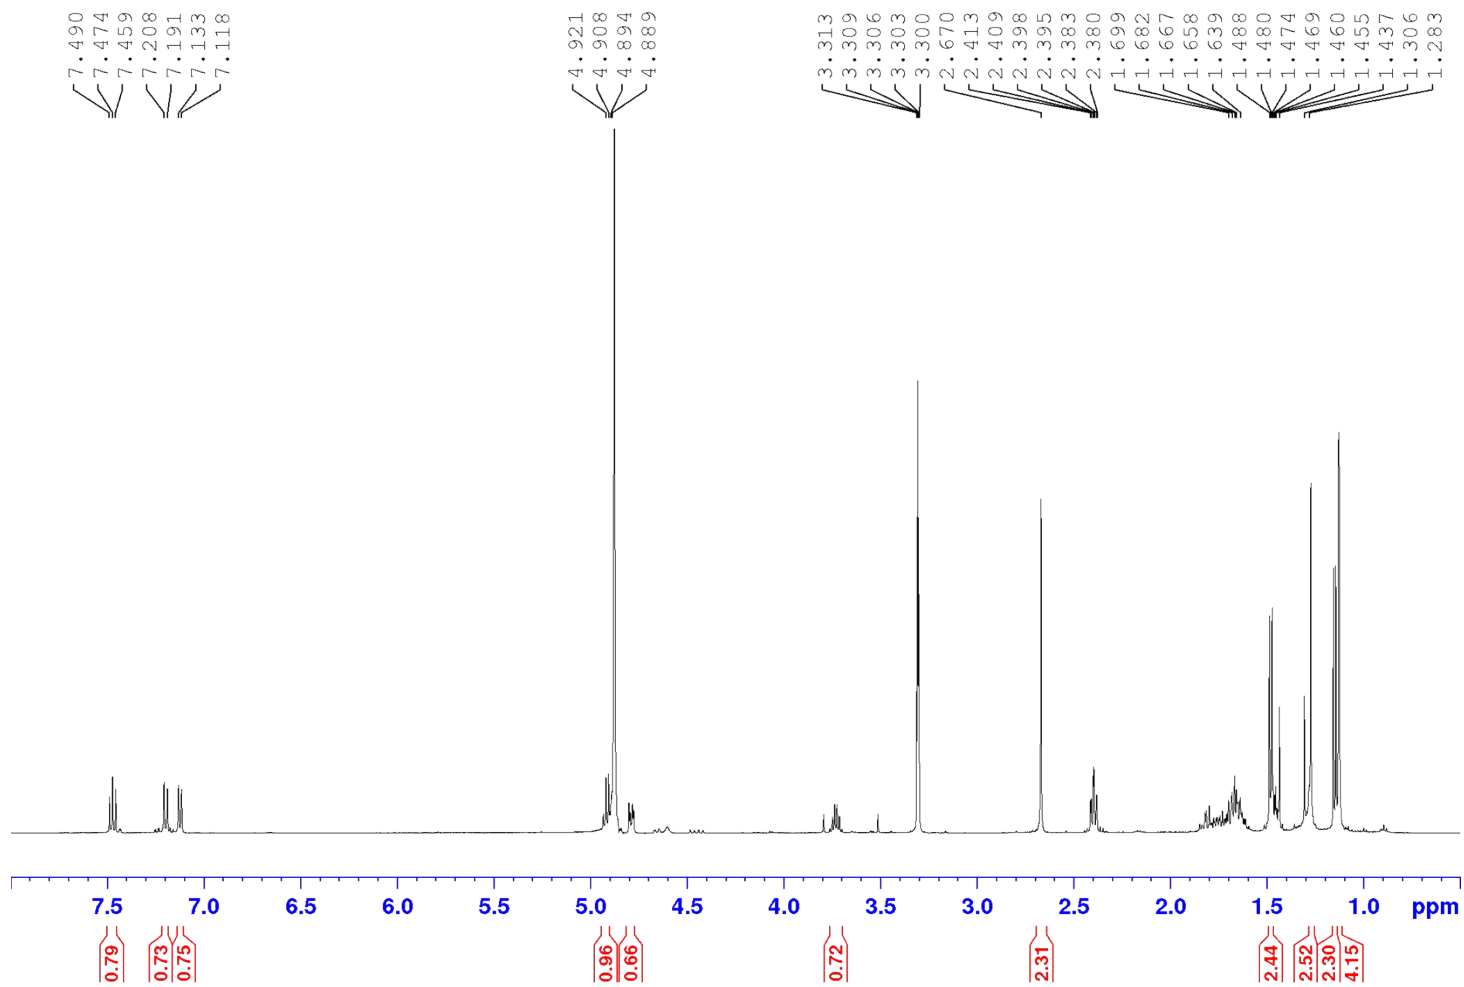

Figure S5.  $^1\text{H}$ - NMR spectrum of *Gerberdriasins A (1)* in  $\text{CD}_3\text{OD}$

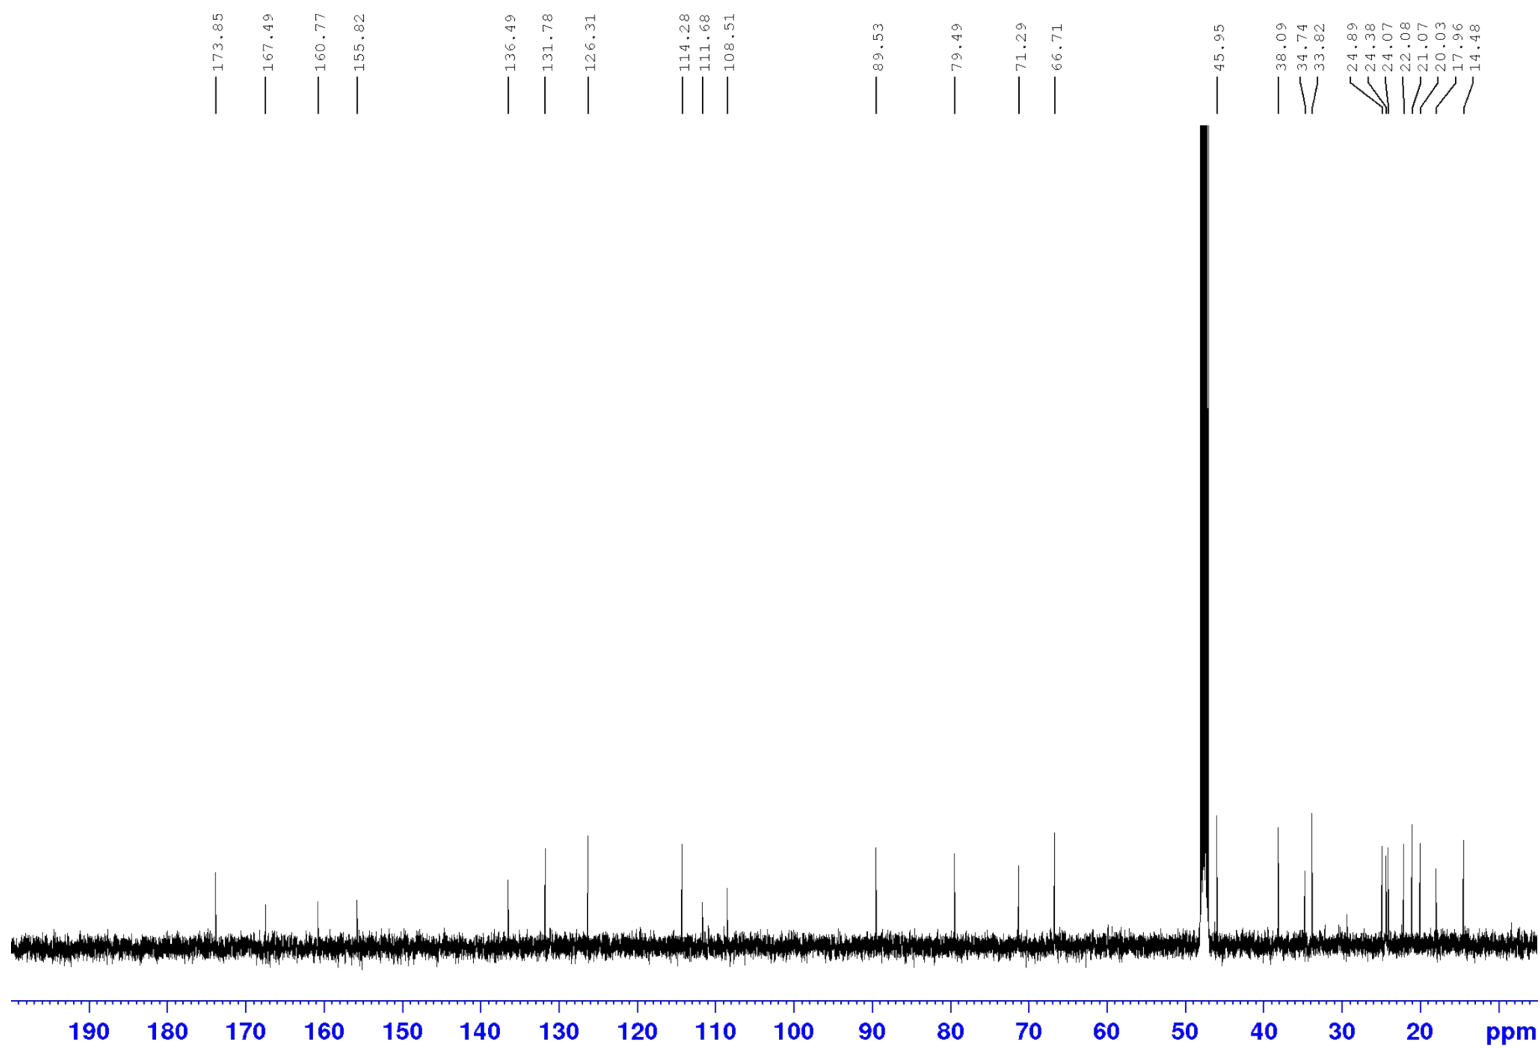

Figure S6.  $^{13}\text{C}$  NMR spectrum of *Gerberdriasins A (1)* in  $\text{CD}_3\text{OD}$

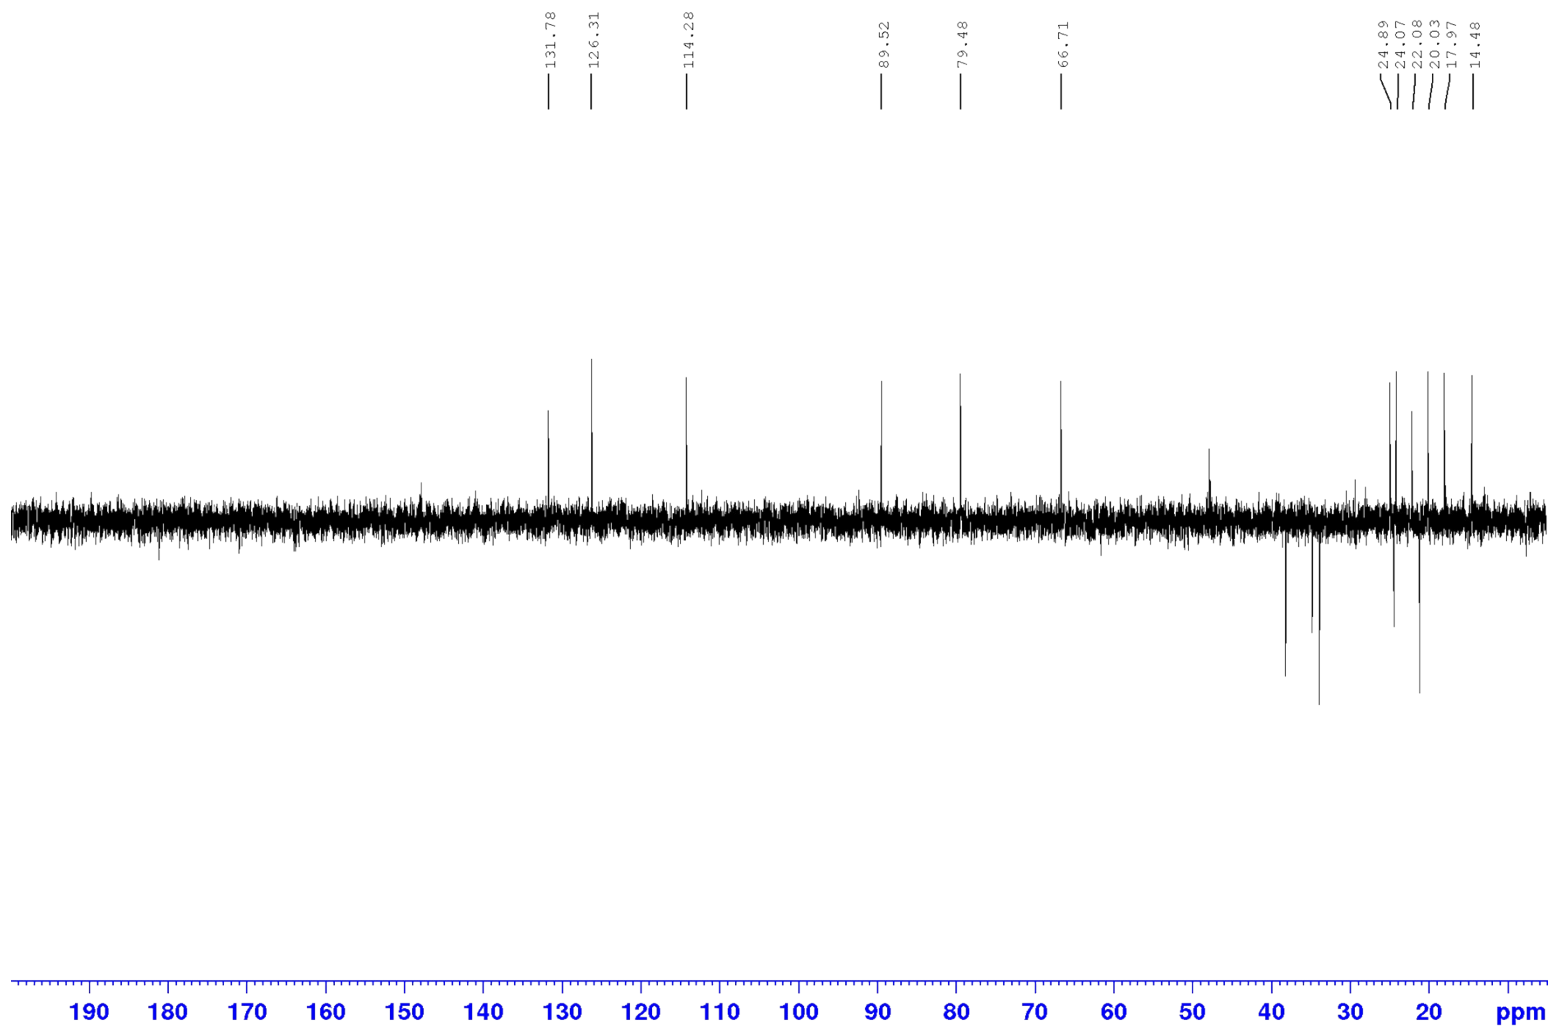

Figure S7. DEPT-135 NMR spectrum of *Gerberdriasins A (1)* in CD<sub>3</sub>OD

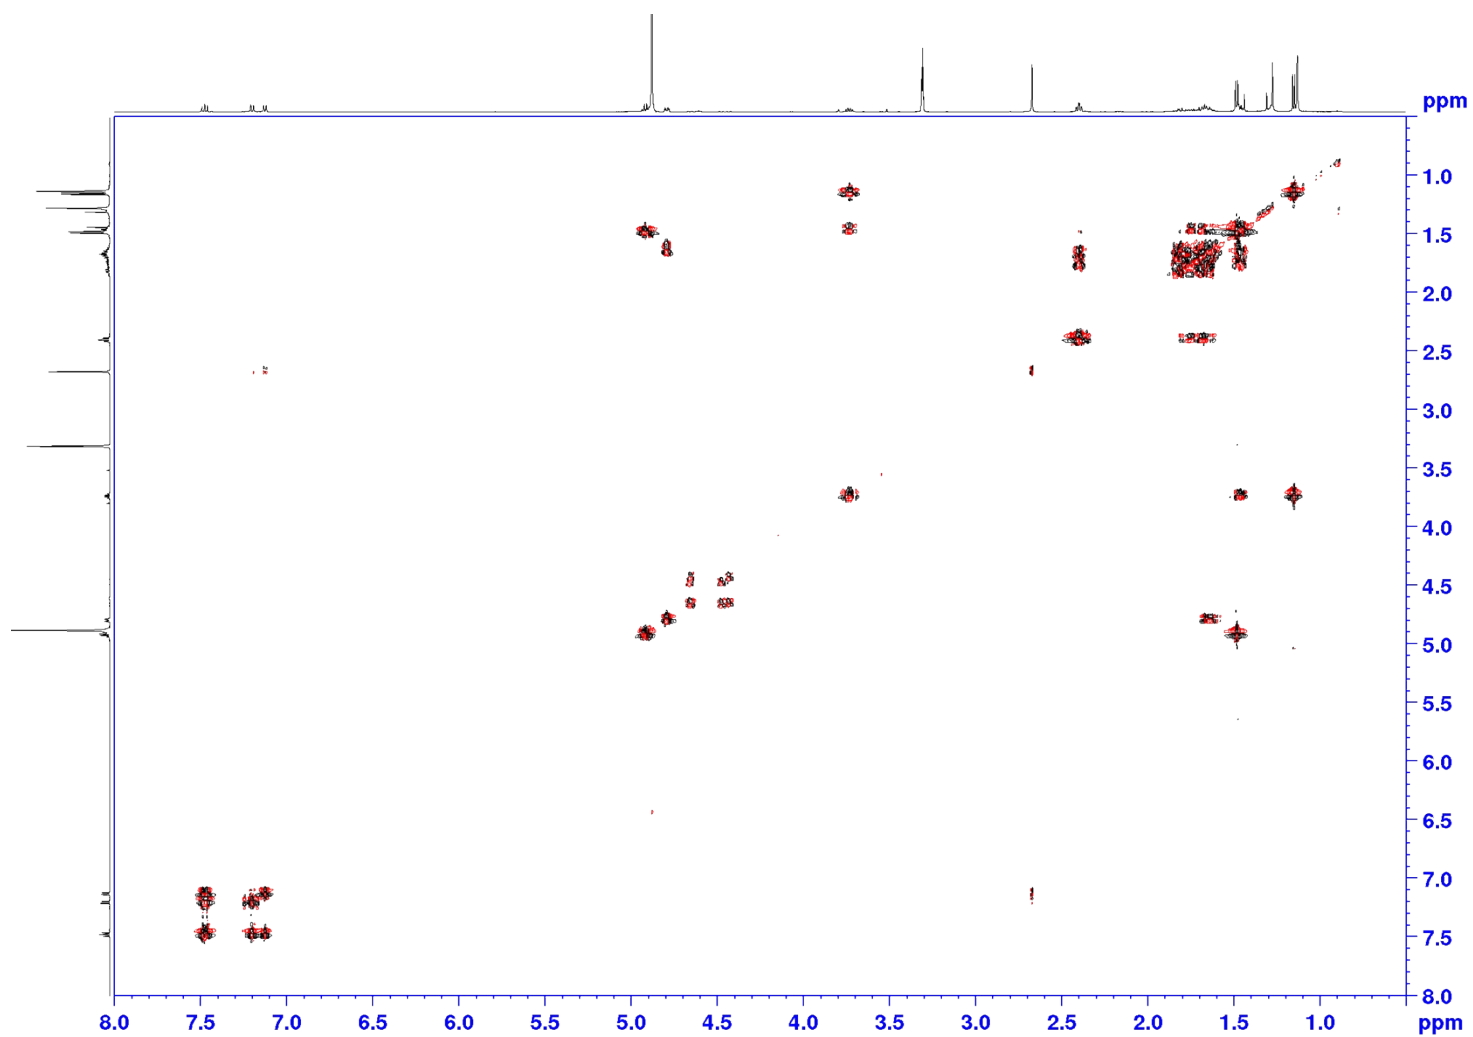

Figure S8.  $^1\text{H}$ - $^1\text{H}$  COSY spectrum of *Gerberdriasins A (1)* in  $\text{CD}_3\text{OD}$

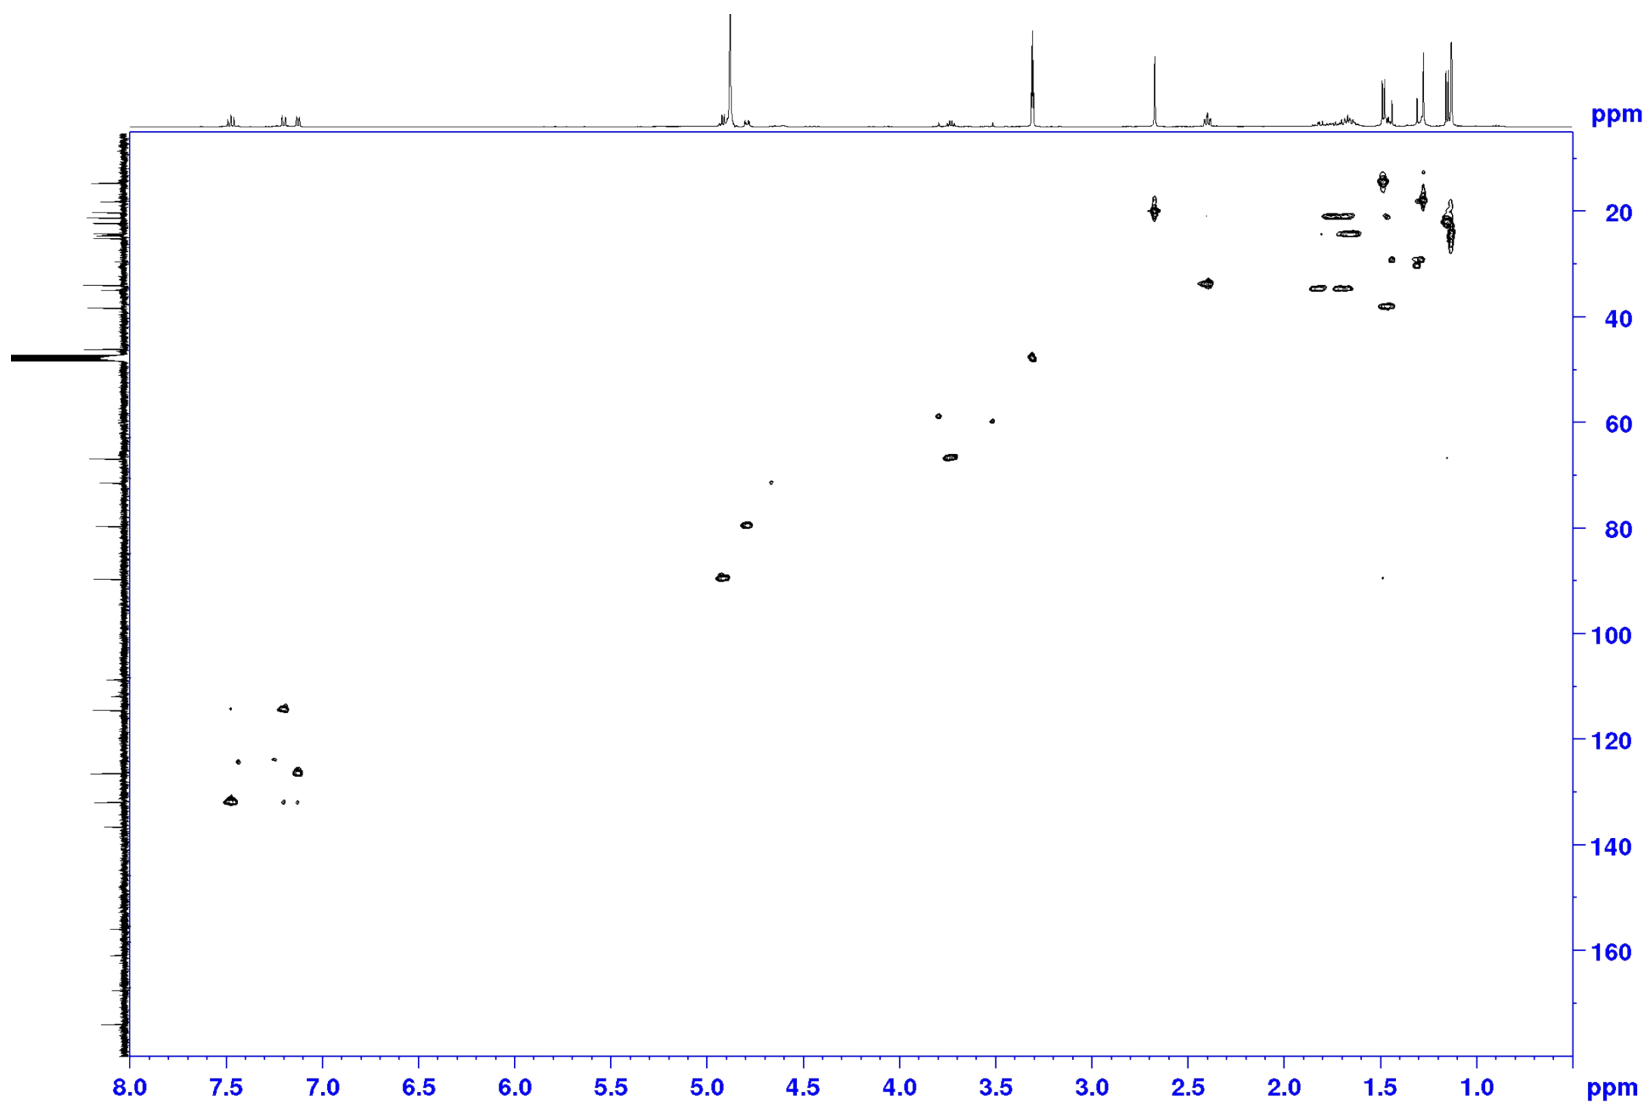

Figure S9. HSQC spectrum of *Gerberdriasins A (1)* in CD<sub>3</sub>OD

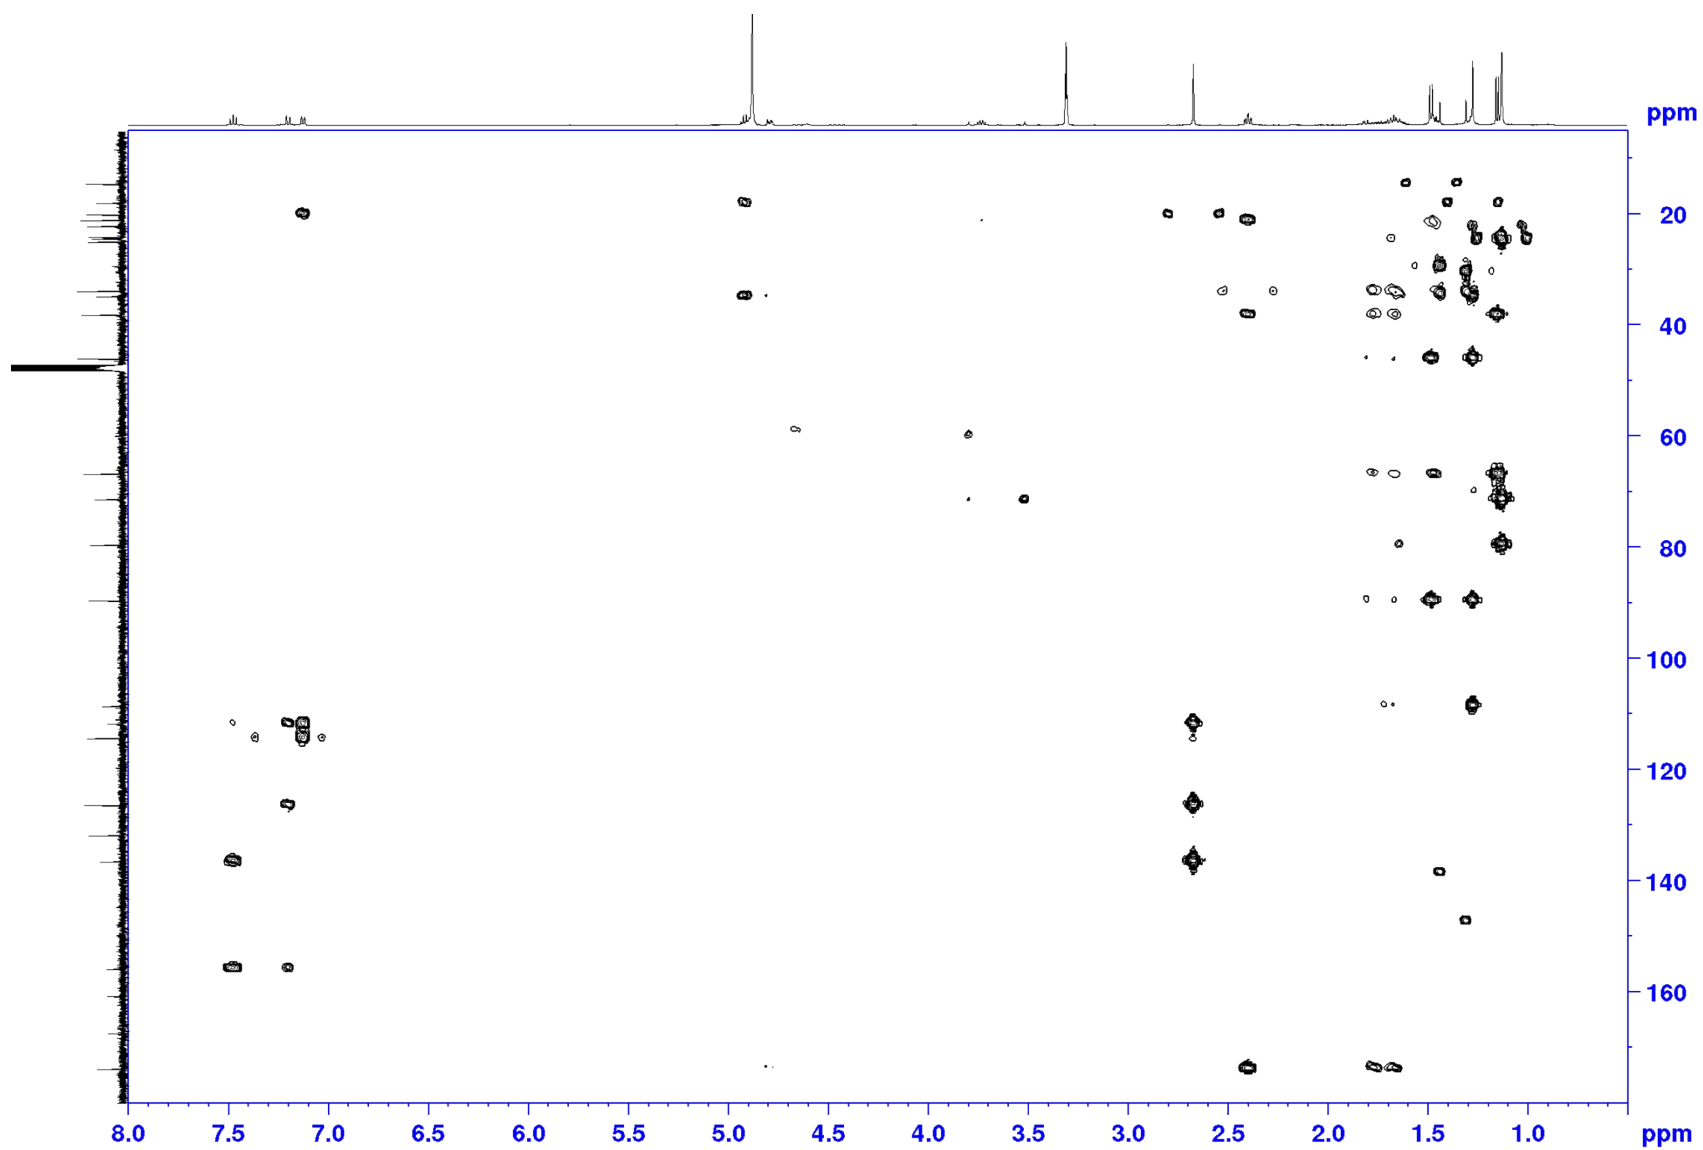

Figure S10. HMBC spectrum of *Gerberdriasins A (1)* in CD<sub>3</sub>OD

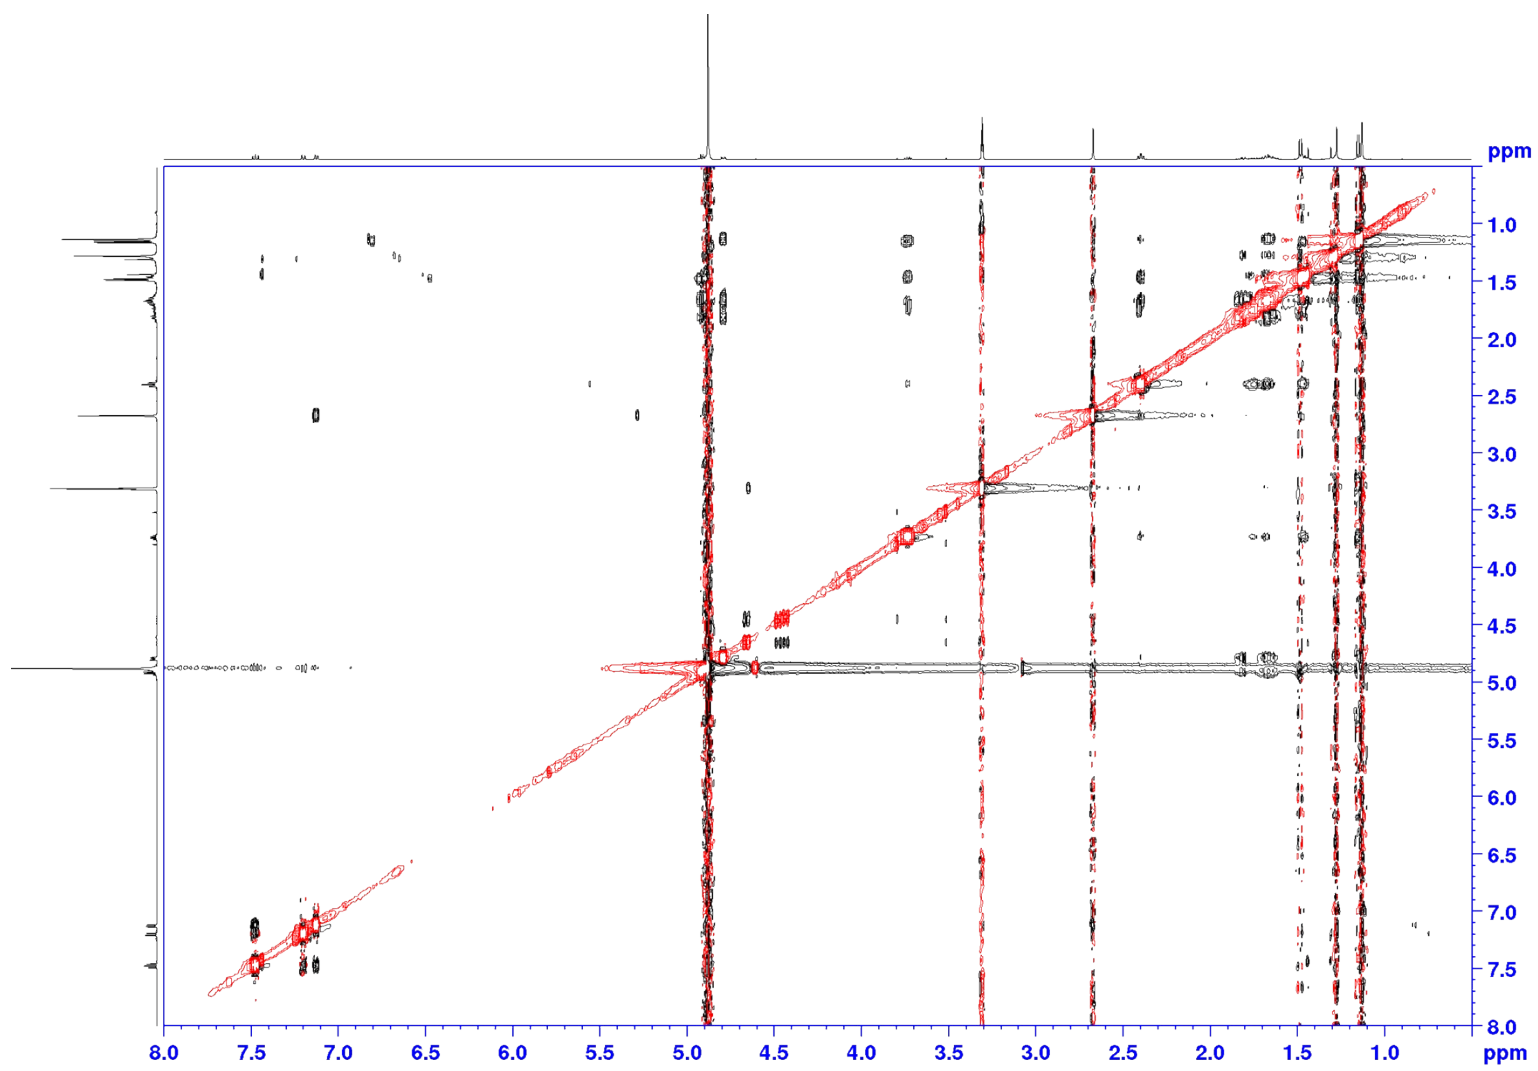

Figure S11. NOESY spectrum of *Gerberdriasin A (1)* in CD<sub>3</sub>OD

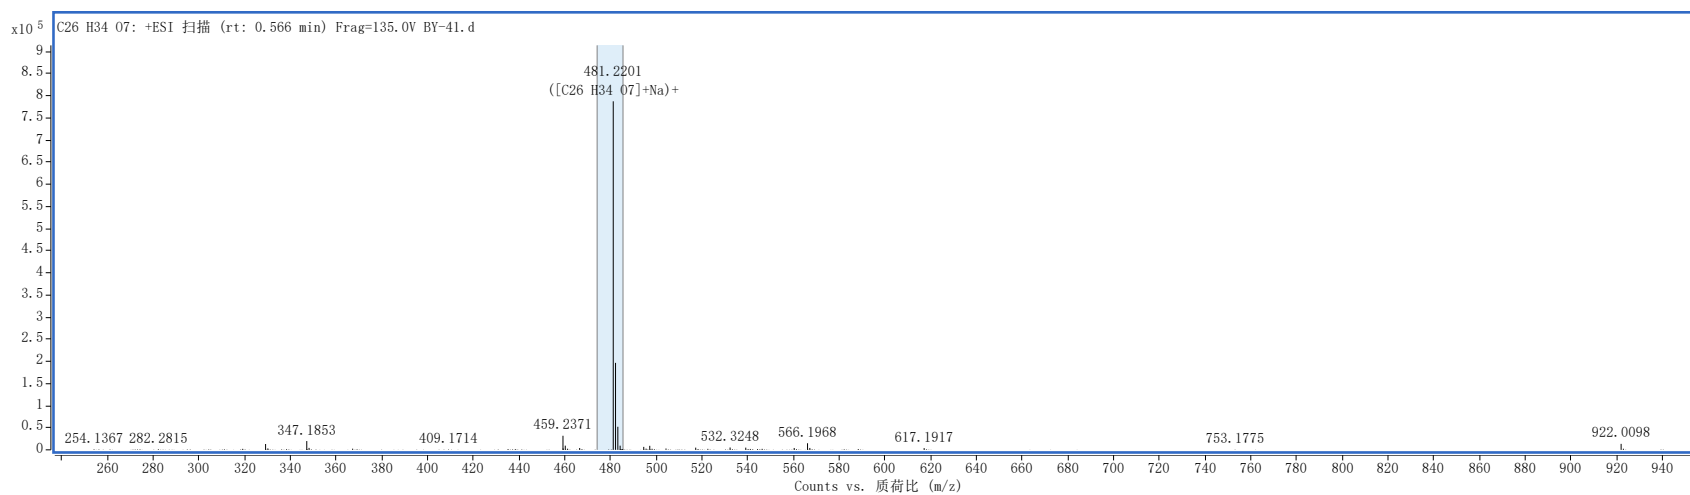

| 峰高总百分比 (Calc) | 峰高 (计算值) | 峰高百分数(计算值) | m/z (Calc) | Diff (mDa) | 峰高       | 峰高百分数 | 峰高总百分比 | m/z      | Diff (ppm) |
|---------------|----------|------------|------------|------------|----------|-------|--------|----------|------------|
| 74.1          | 774564.7 | 100        | 481.2197   | -0.4       | 787452.4 | 100   | 75.3   | 481.2201 | -0.8       |

| 最佳   | ID 来源 | 分子式        | 种类      | m/z      | 分数    | Diff (ppm) | 分数 (MFG) |
|------|-------|------------|---------|----------|-------|------------|----------|
| TRUE | MFG   | C26 H34 O7 | (M+Na)+ | 481.2201 | 93.63 | -0.99      | 93.63    |

**Figure S12. HRESIMS spectrum of *Gerberdriasin B* (2)**



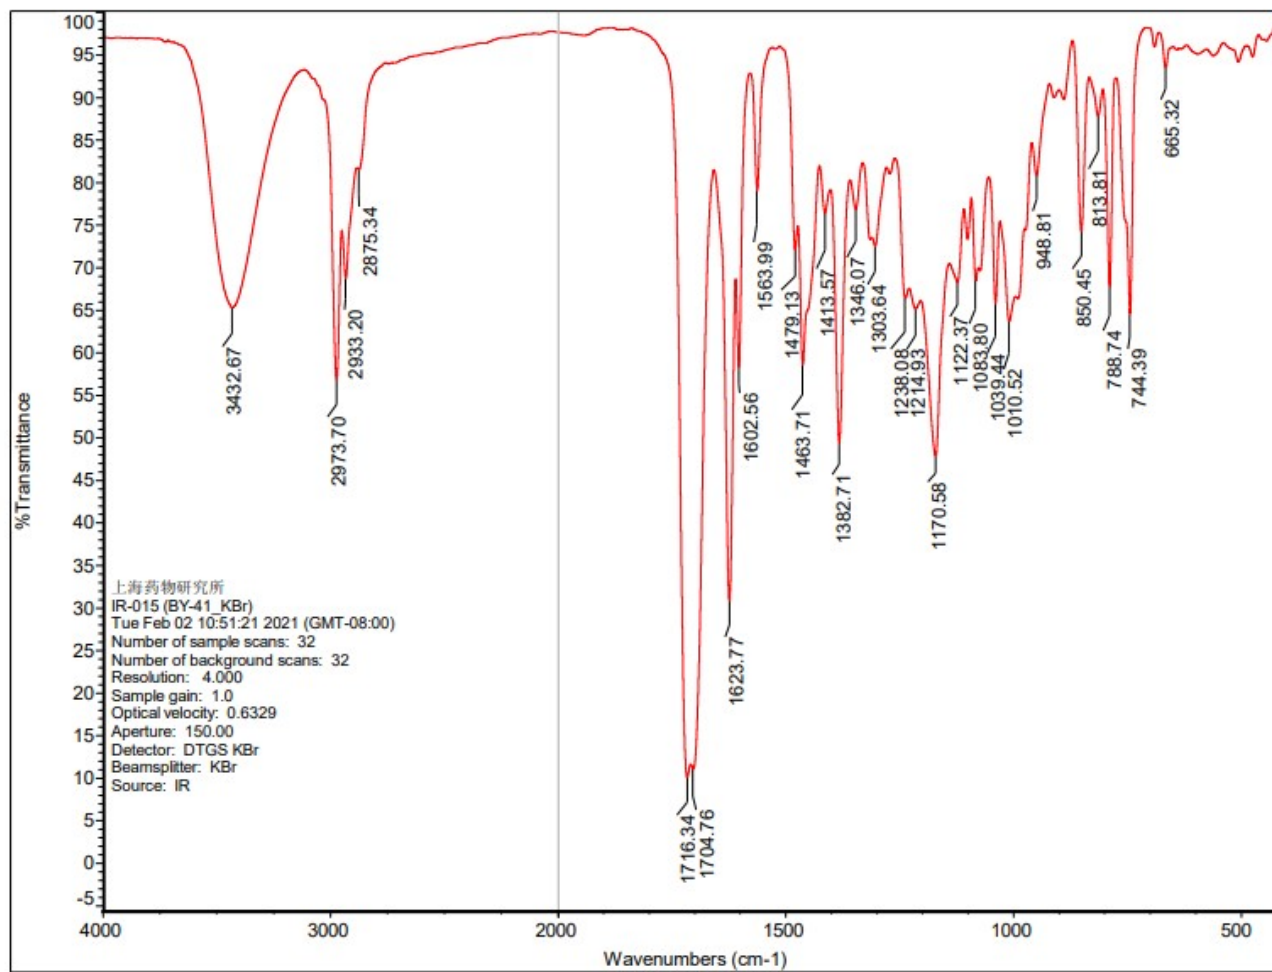

Figure S13. IR spectrum of *Gerberdriasin B* (2)

**Rudolph Research Analytical**

Thursday, 11/05/2020

This sample was measured on an Autopol VI, serial number 90079,  
manufactured by Rudolph Research Analytical, Hackettstown, NJ.

LotID : BY-41  
Set Temperature : 20.0  
Temp Corr : OFF

| <b>n</b> | <b>Average</b> | <b>Std.Dev.</b> | <b>Maximum</b> | <b>Minimum</b> |
|----------|----------------|-----------------|----------------|----------------|
| 6        | -14.445        | 0.4972          | -13.333        | -14.667        |

| <b>S.No</b> | <b>Sample ID</b> | <b>Time</b> | <b>Result</b> | <b>Scale</b> | <b>OR °Arc</b> | <b>WLG</b> | <b>Lg.mm</b> | <b>Conc.</b> | <b>Temp.</b> | <b>Comment</b> |
|-------------|------------------|-------------|---------------|--------------|----------------|------------|--------------|--------------|--------------|----------------|
| 1           | BY-41            | 05:02:08 PM | -14.667       | SR           | -0.011         | 589        | 100.00       | 0.075        | 20.0         |                |
| 2           | BY-41            | 05:02:14 PM | -14.667       | SR           | -0.011         | 589        | 100.00       | 0.075        | 20.0         |                |
| 3           | BY-41            | 05:02:20 PM | -14.667       | SR           | -0.011         | 589        | 100.00       | 0.075        | 19.9         |                |
| 4           | BY-41            | 05:02:27 PM | -14.667       | SR           | -0.011         | 589        | 100.00       | 0.075        | 19.9         |                |
| 5           | BY-41            | 05:02:33 PM | -14.667       | SR           | -0.011         | 589        | 100.00       | 0.075        | 19.9         |                |
| 6           | BY-41            | 05:02:39 PM | -13.333       | SR           | -0.010         | 589        | 100.00       | 0.075        | 19.9         |                |

\_\_\_\_\_  
Signature

**Figure S14. OR Value of *Gerberdriasin B (2)* in CH<sub>3</sub>OH**

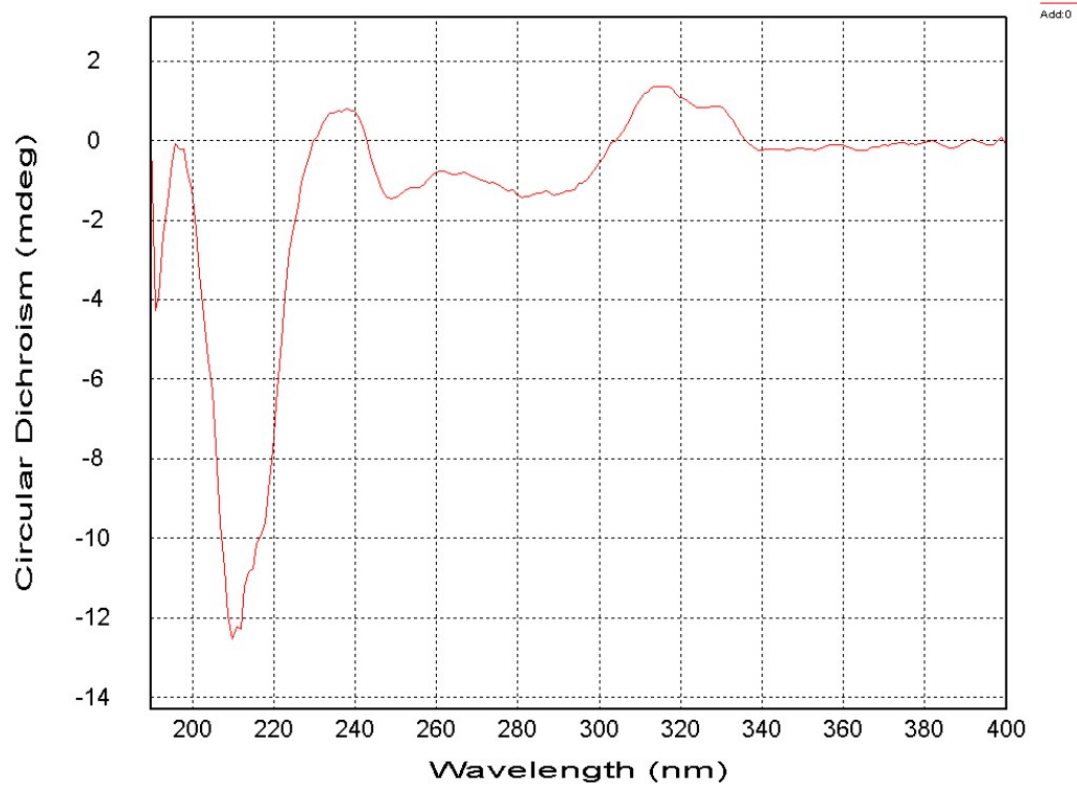

**Figure S15. CD spectra of *Gerberdriasin B (2)* in CH<sub>3</sub>OH**

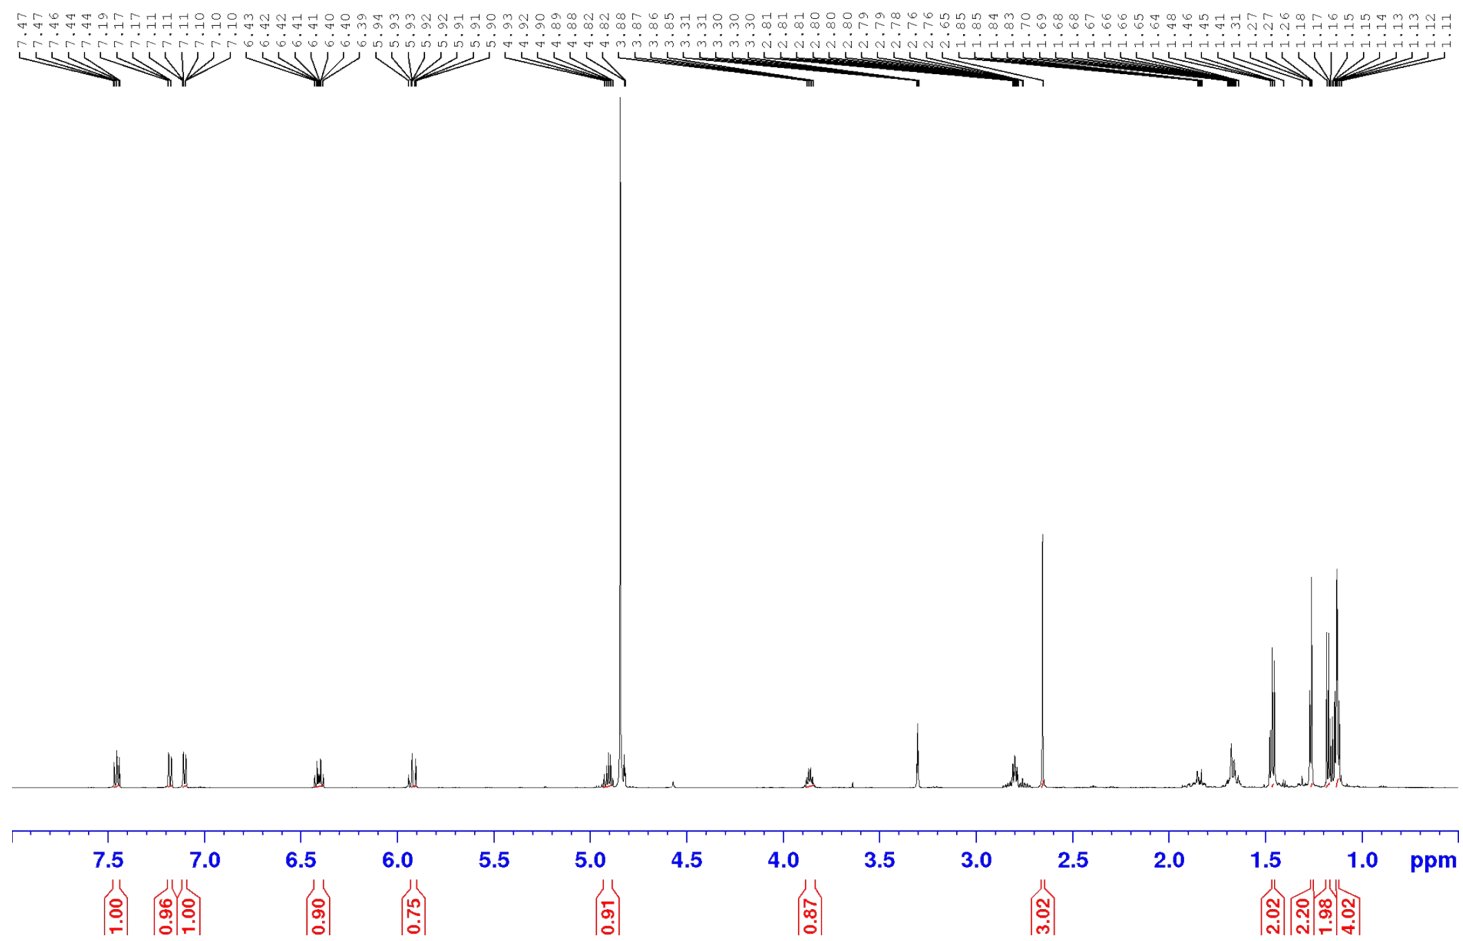

Figure S16. <sup>1</sup>H NMR spectrum of *Gerberdriasin B (2)* in CD<sub>3</sub>OD

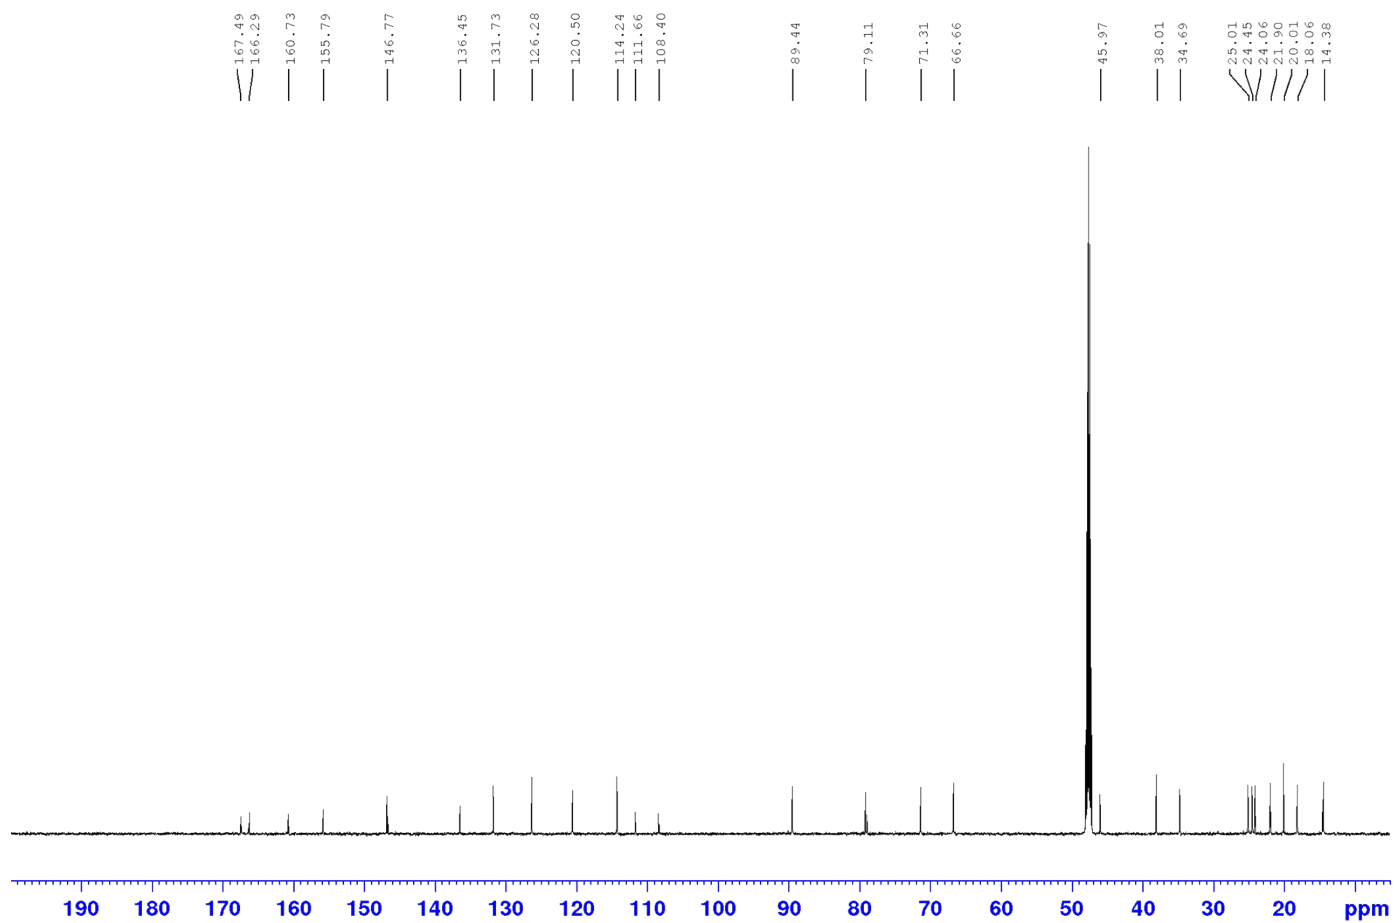

Figure S17. <sup>13</sup>C NMR spectrum of *Gerberdriasin B (2)* in CD<sub>3</sub>OD

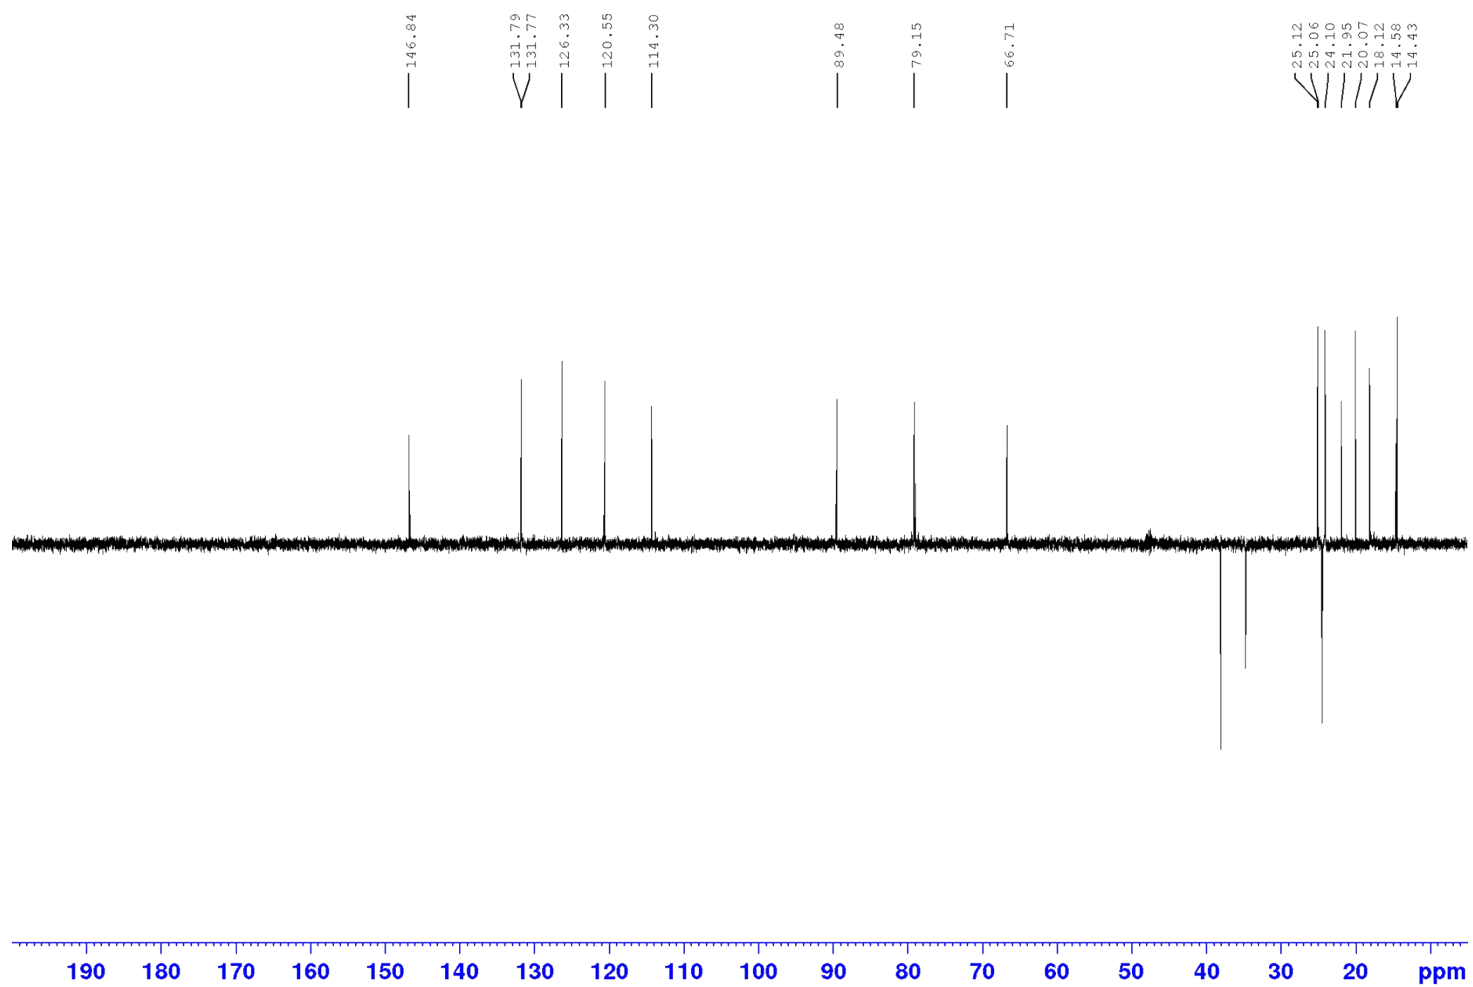

Figure S18. DEPT-135 NMR spectrum of *Gerberdriasin B (2)* in  $CD_3OD$

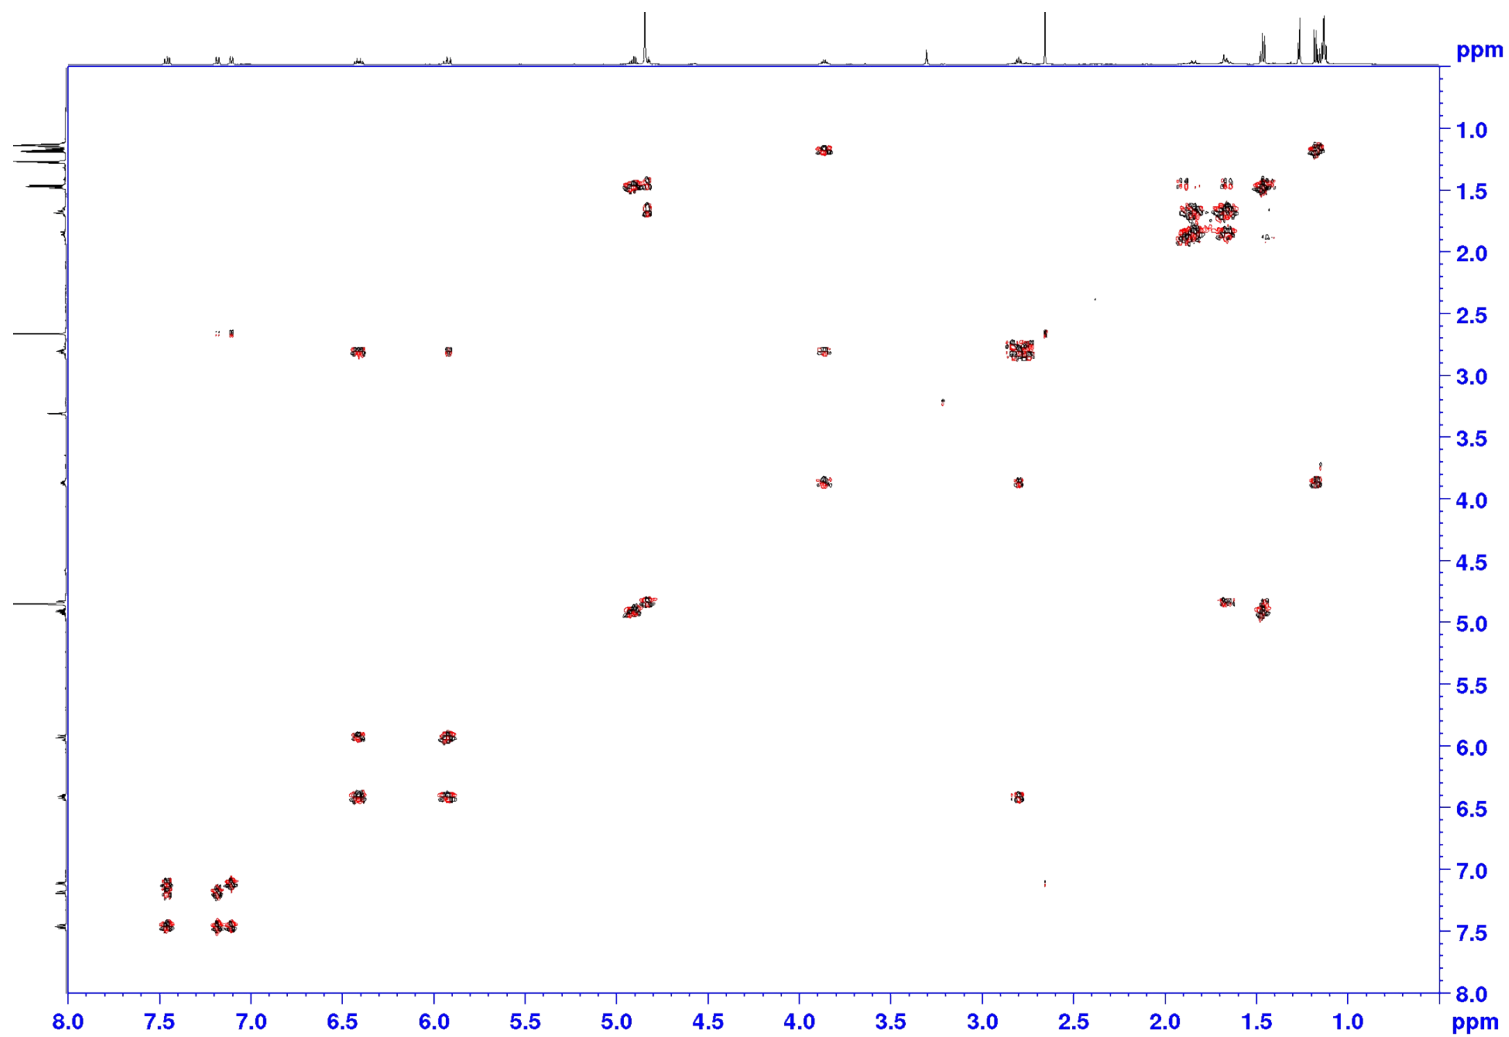

Figure S19.  $^1\text{H}$ - $^1\text{H}$  COSY spectrum of *Gerberdriasin B* (2) in  $\text{CD}_3\text{OD}$

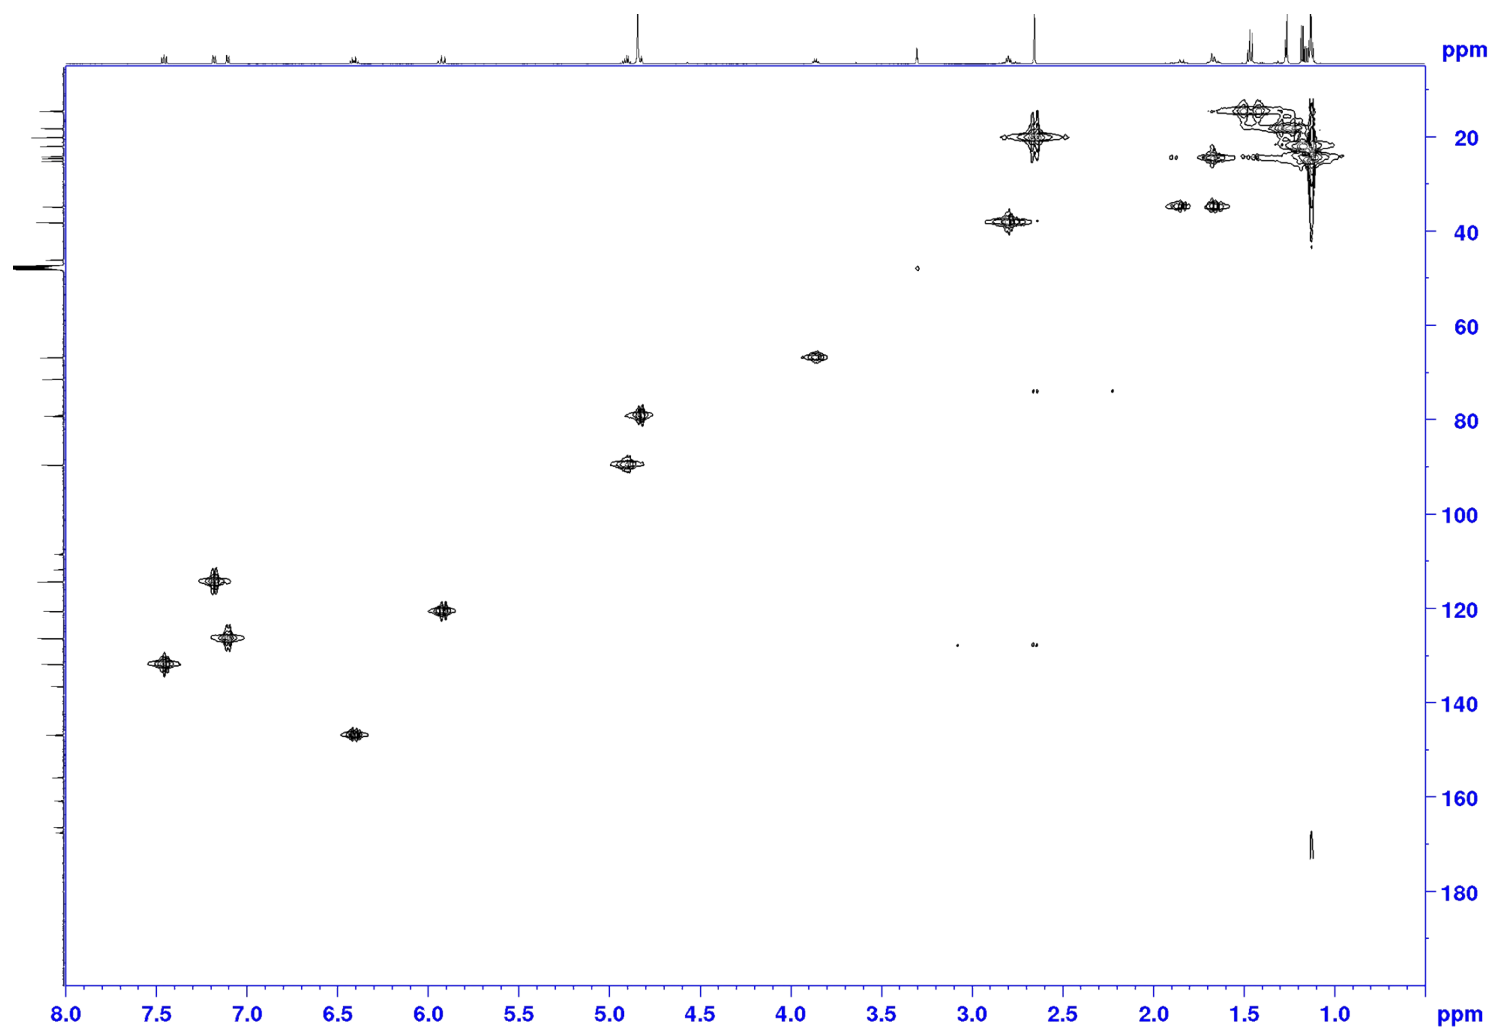

Figure S20. HSQC spectrum of *Gerberdriasin B (2)* in CD<sub>3</sub>OD



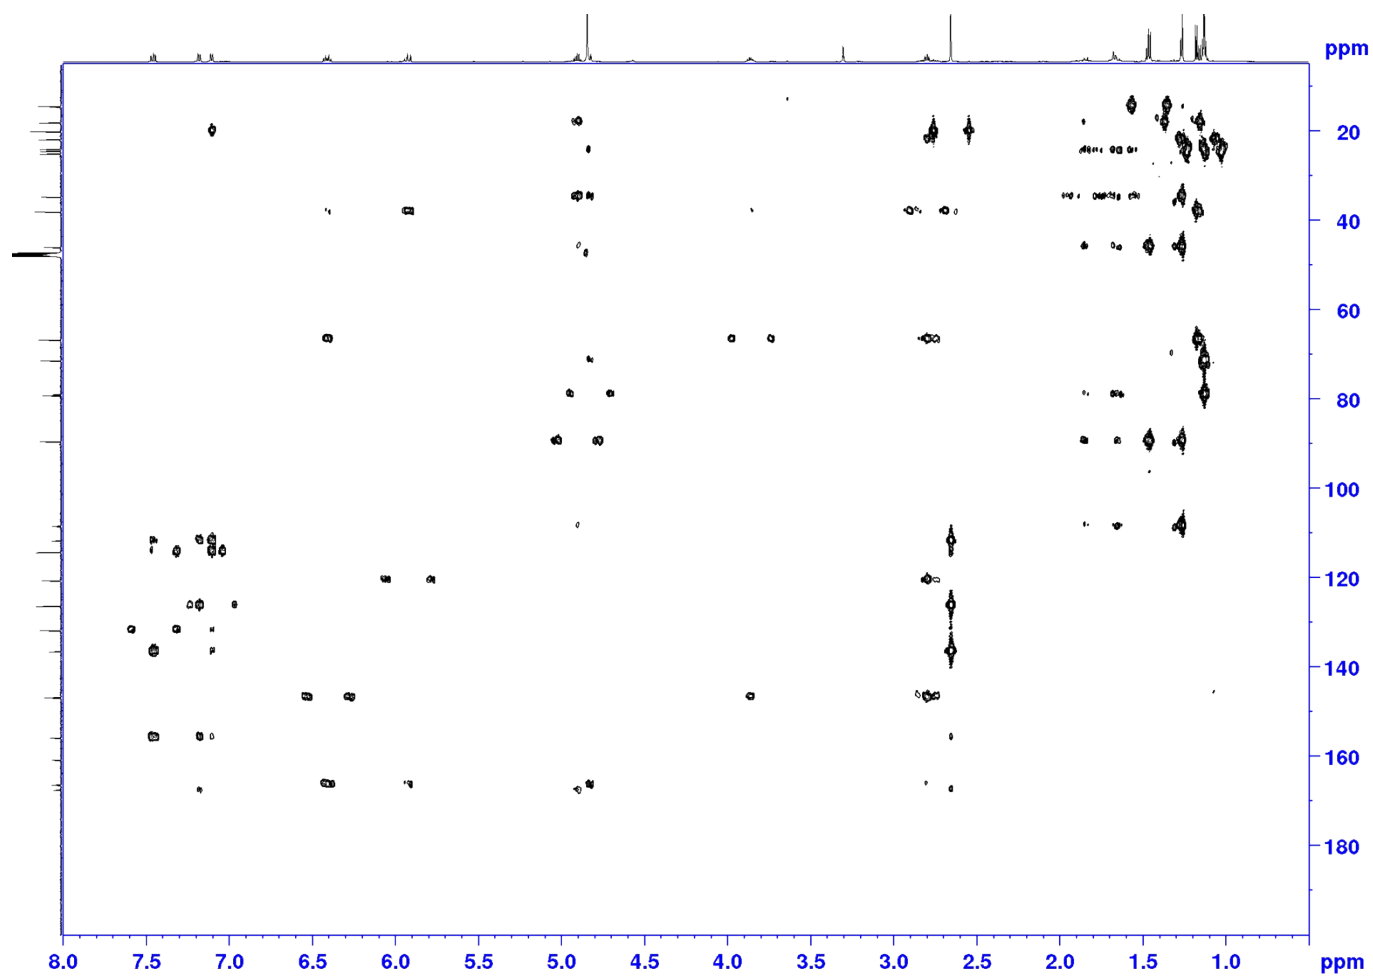

Figure S21. HMBC spectrum of *Gerberdriasin B* (2) in CD<sub>3</sub>OD

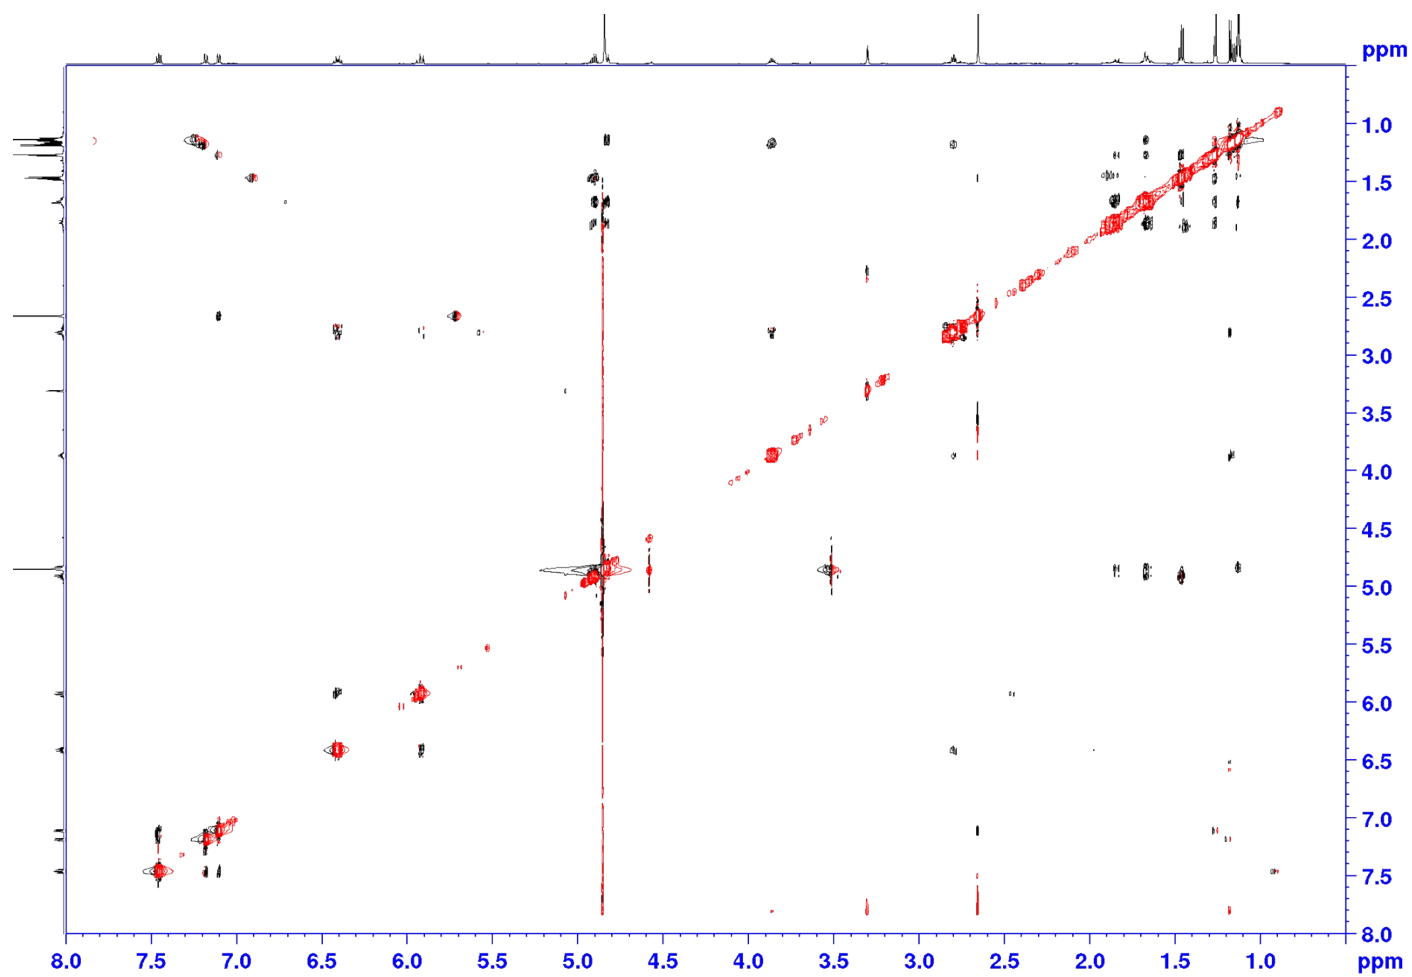

Figure S22. NOESY spectrum of *Gerberdriasin B (2)* in  $\text{CD}_3\text{OD}$

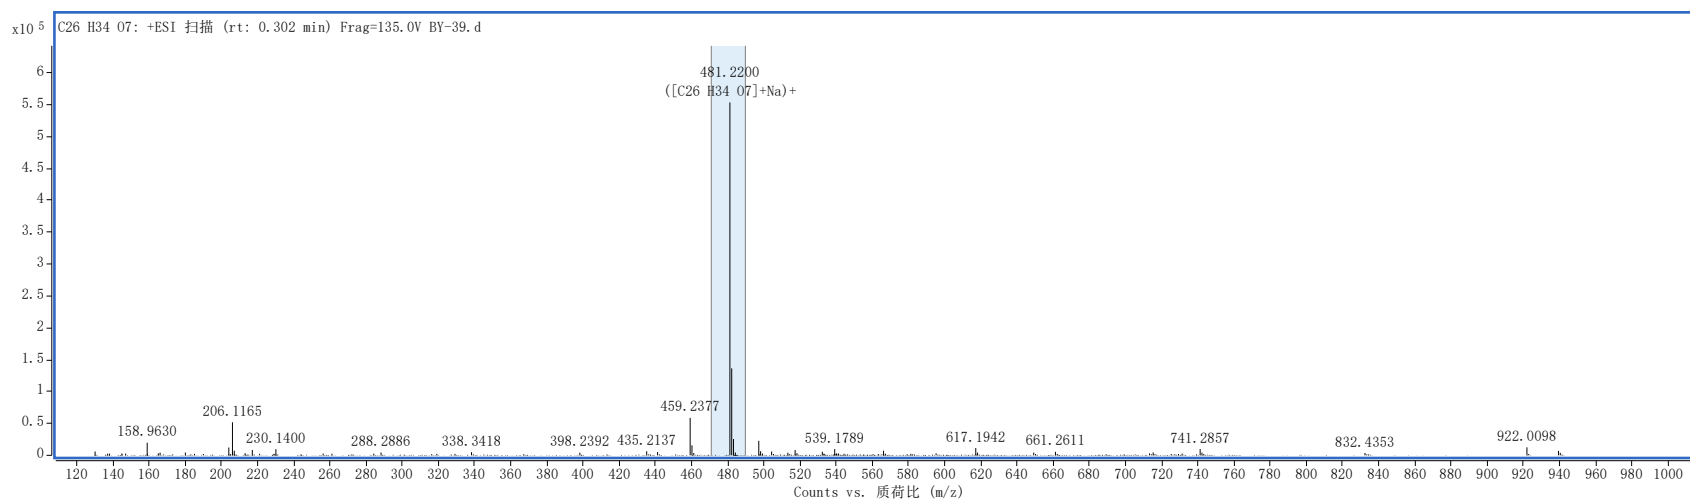

| 峰高总百分比 (Calc) | 峰高 (计算值) | 峰高百分数(计算值) | m/z (Calc) | Diff (mDa) | 峰高       | 峰高百分数 | 峰高总百分比 | m/z    | Diff (ppm) |
|---------------|----------|------------|------------|------------|----------|-------|--------|--------|------------|
| 74.5          | 533033.5 | 100        | 481.2197   | -0.3       | 553444.9 | 100   | 77.4   | 481.22 | -0.67      |

| ID 来源 | 分子式        | 种类      | m/z      | 分数   | Diff (ppm) | 分数 (MFG) |
|-------|------------|---------|----------|------|------------|----------|
| MFG   | C26 H34 O7 | (M+Na)+ | 481.2200 | 96.7 | -0.55      | 96.7     |

**Figure S23. HRESIMS spectrum of *Gerberdriasin C (3)***

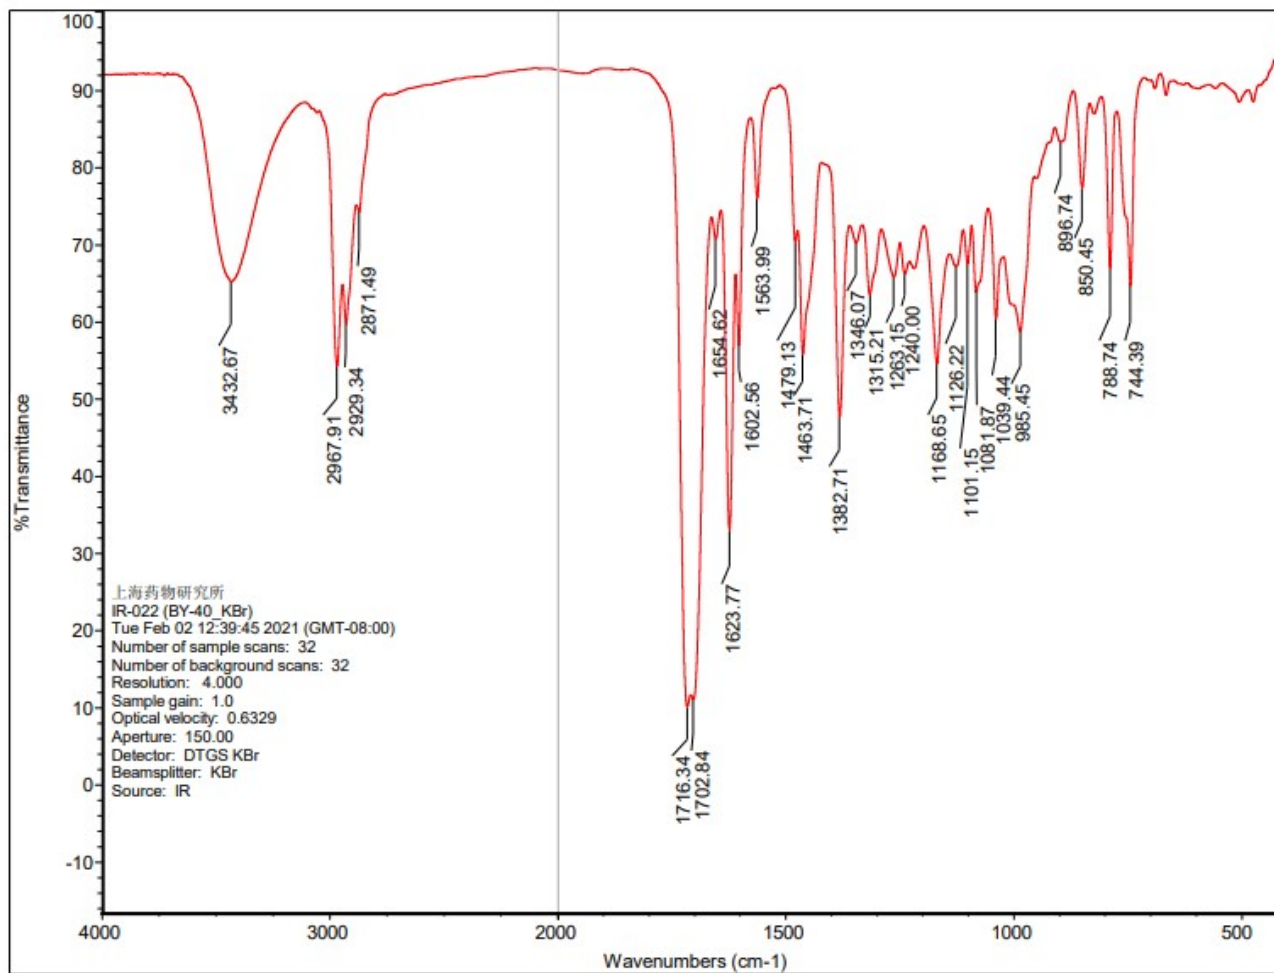

Figure S24. IR spectrum of *Gerberdriasin C (3)*

**Rudolph Research Analytical**

Thursday, 11/05/2020

This sample was measured on an Autopol VI, serial number 90079,  
manufactured by Rudolph Research Analytical, Hackettstown, NJ.

LotID : BY-40  
Set Temperature : 20.0  
Temp Corr : OFF

|          |                |                 |                |                |
|----------|----------------|-----------------|----------------|----------------|
| <b>n</b> | <b>Average</b> | <b>Std.Dev.</b> | <b>Maximum</b> | <b>Minimum</b> |
| 6        | -5.278         | 0.6213          | -5.000         | -6.667         |

| S.No | Sample ID | Time        | Result | Scale | OR ° Arc | WLG | Lg.mm  | Conc. | Temp. | Comment |
|------|-----------|-------------|--------|-------|----------|-----|--------|-------|-------|---------|
| 1    | BY-40     | 04:42:59 PM | -5.000 | SR    | -0.003   | 589 | 100.00 | 0.060 | 20.0  |         |
| 2    | BY-40     | 04:43:06 PM | -6.667 | SR    | -0.004   | 589 | 100.00 | 0.060 | 20.0  |         |
| 3    | BY-40     | 04:43:11 PM | -5.000 | SR    | -0.003   | 589 | 100.00 | 0.060 | 20.0  |         |
| 4    | BY-40     | 04:43:17 PM | -5.000 | SR    | -0.003   | 589 | 100.00 | 0.060 | 20.0  |         |
| 5    | BY-40     | 04:43:23 PM | -5.000 | SR    | -0.003   | 589 | 100.00 | 0.060 | 20.0  |         |
| 6    | BY-40     | 04:43:29 PM | -5.000 | SR    | -0.003   | 589 | 100.00 | 0.060 | 19.9  |         |

\_\_\_\_\_  
Signature

**Figure S25. OR Value of *Gerberdriasin C (3)* in CH<sub>3</sub>OH**

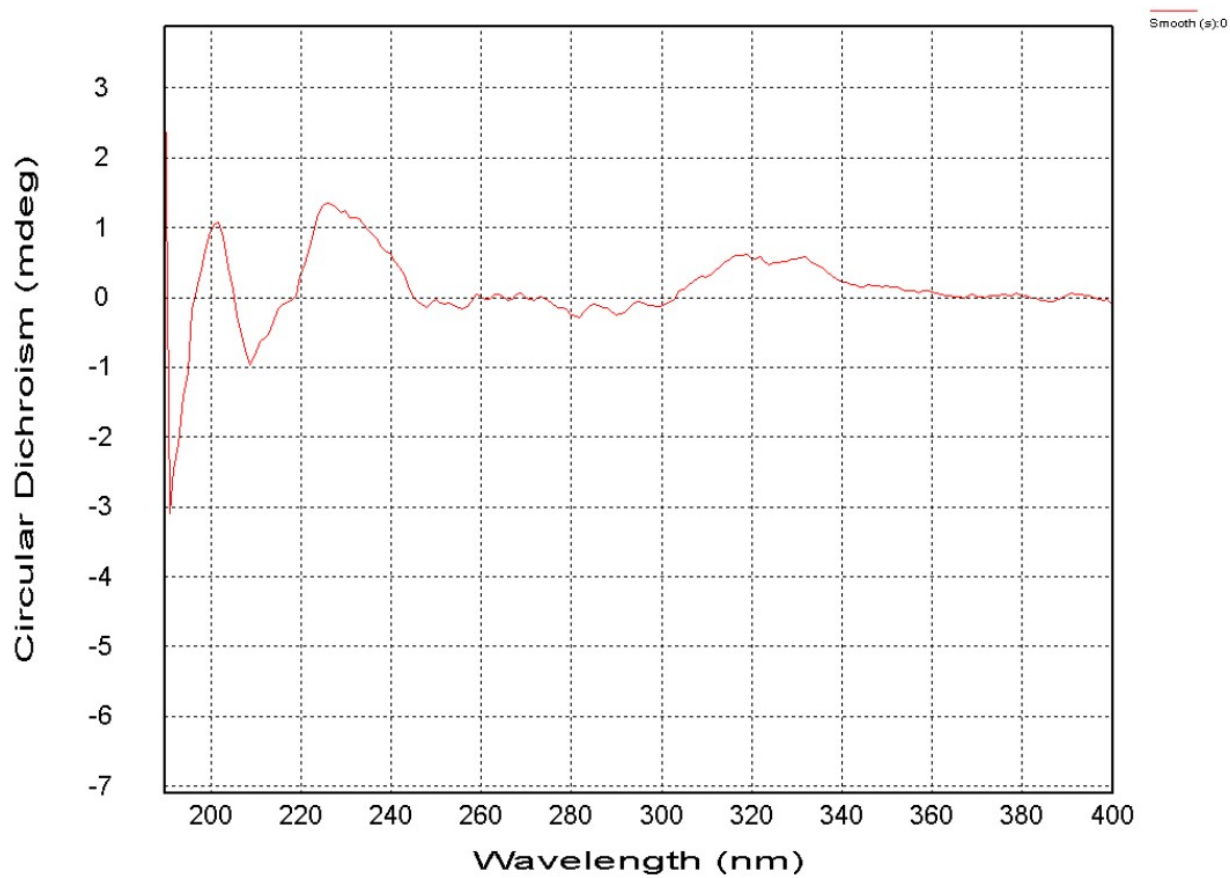

Figure S26. CD spectra of *Gerberdriasin C* (**3**) in CH<sub>3</sub>OH

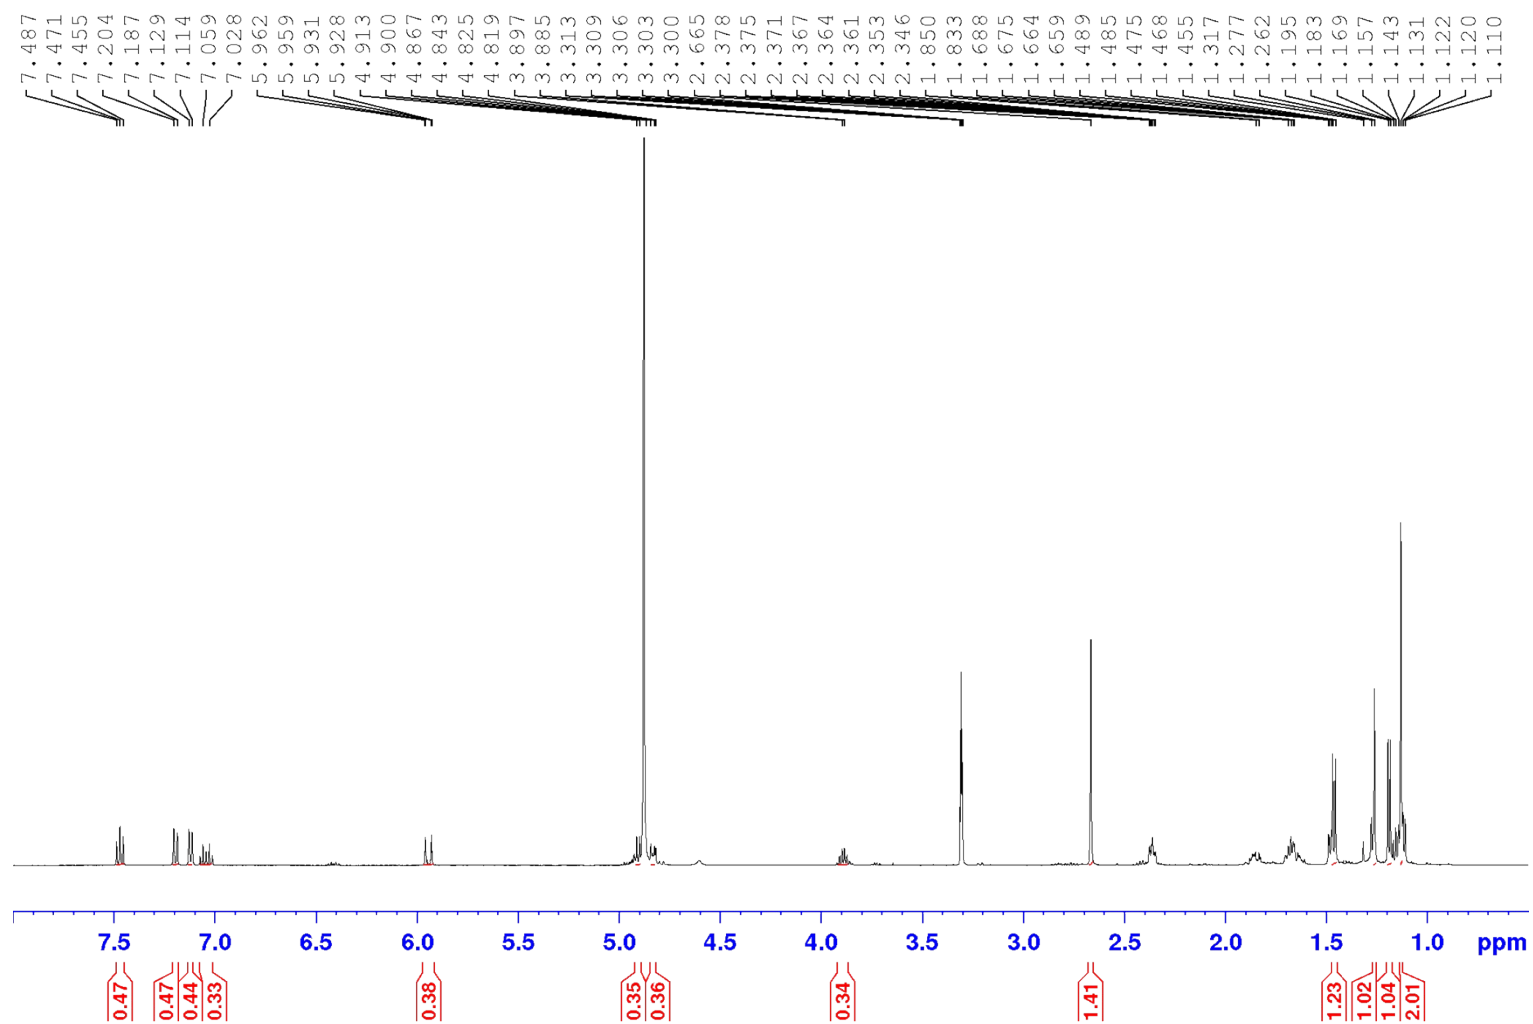

Figure S27. <sup>1</sup>H NMR spectrum of *Gerberdriasin C* (**3**) in CD<sub>3</sub>OD

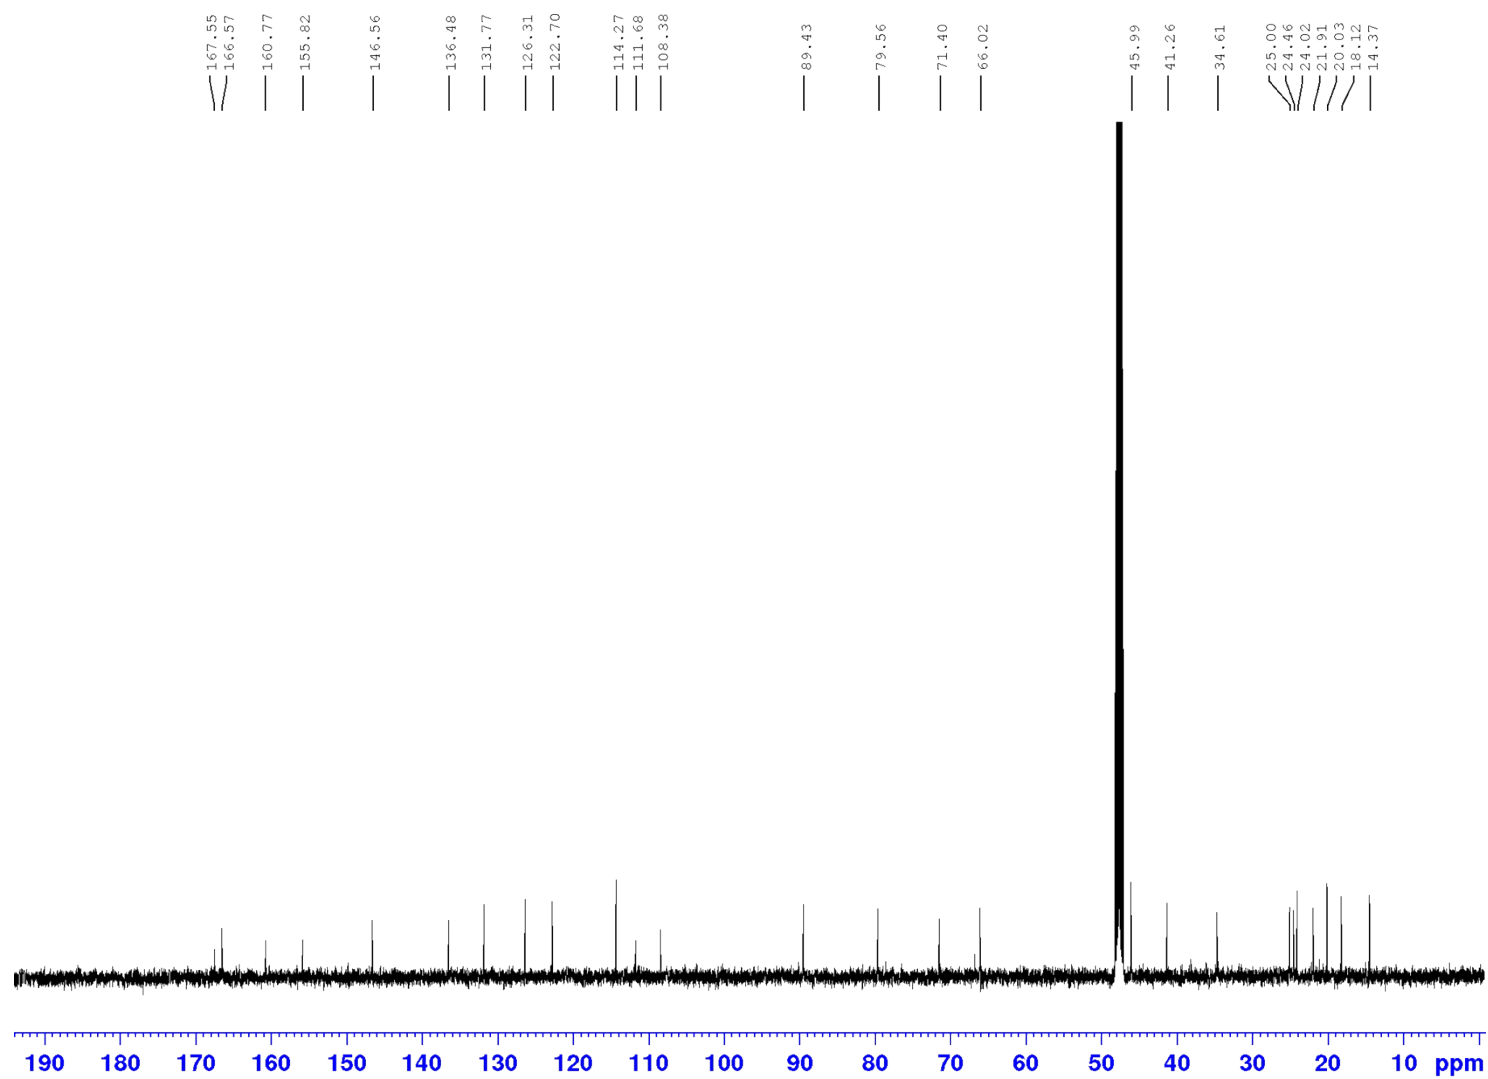

Figure S28.  $^{13}\text{C}$  NMR spectrum of *Gerberdriasin C (3)* in  $\text{CD}_3\text{OD}$



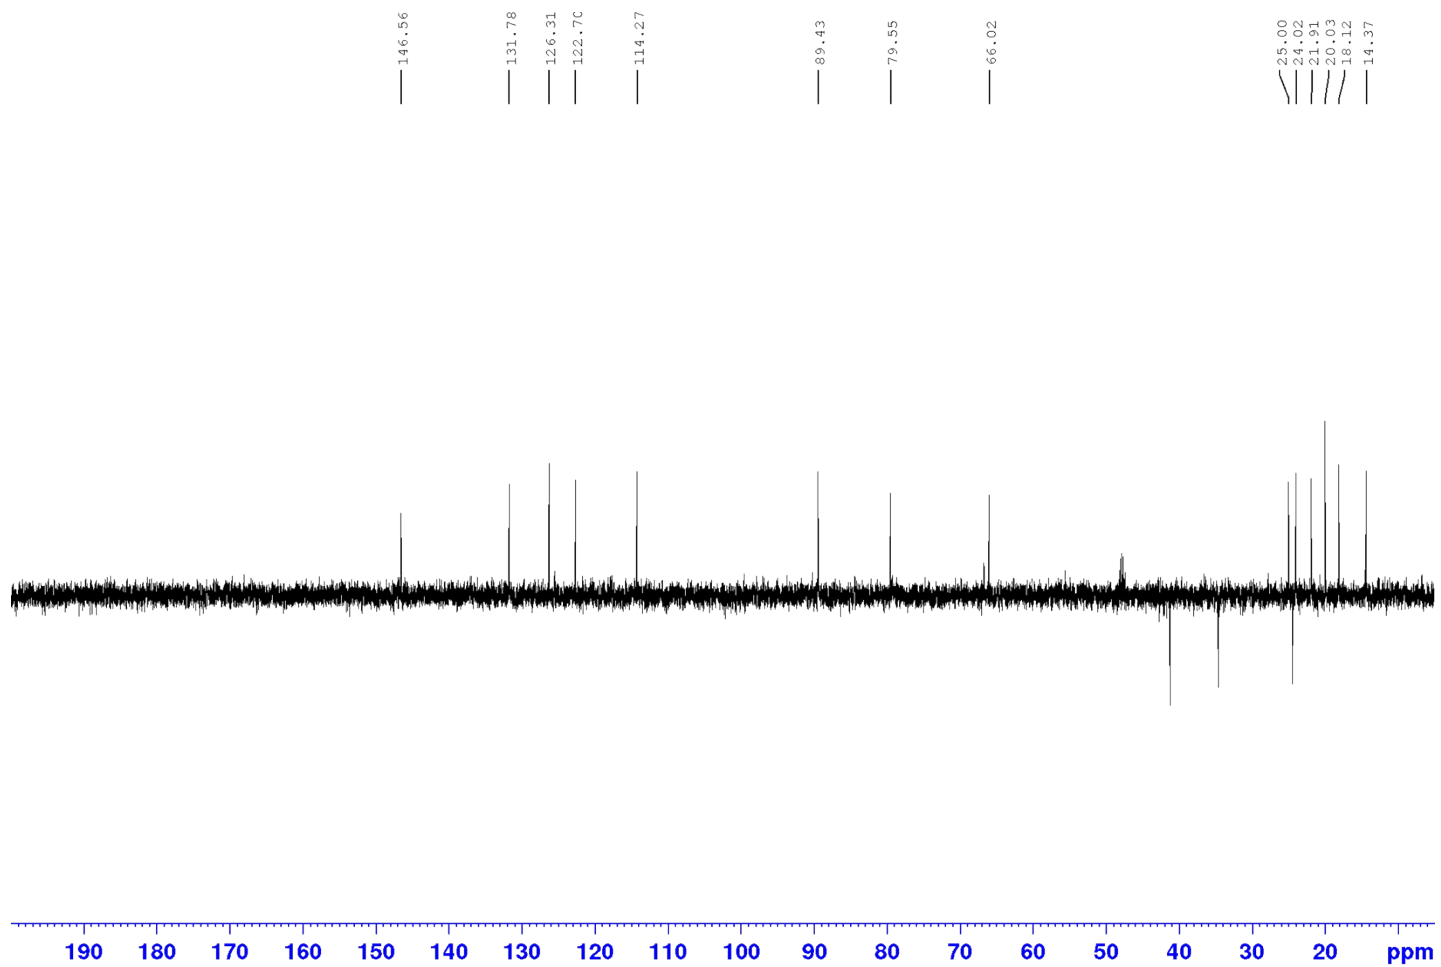

Figure S29. DEPT-135 NMR spectrum of *Gerberdriasin C (3)* in CD<sub>3</sub>OD

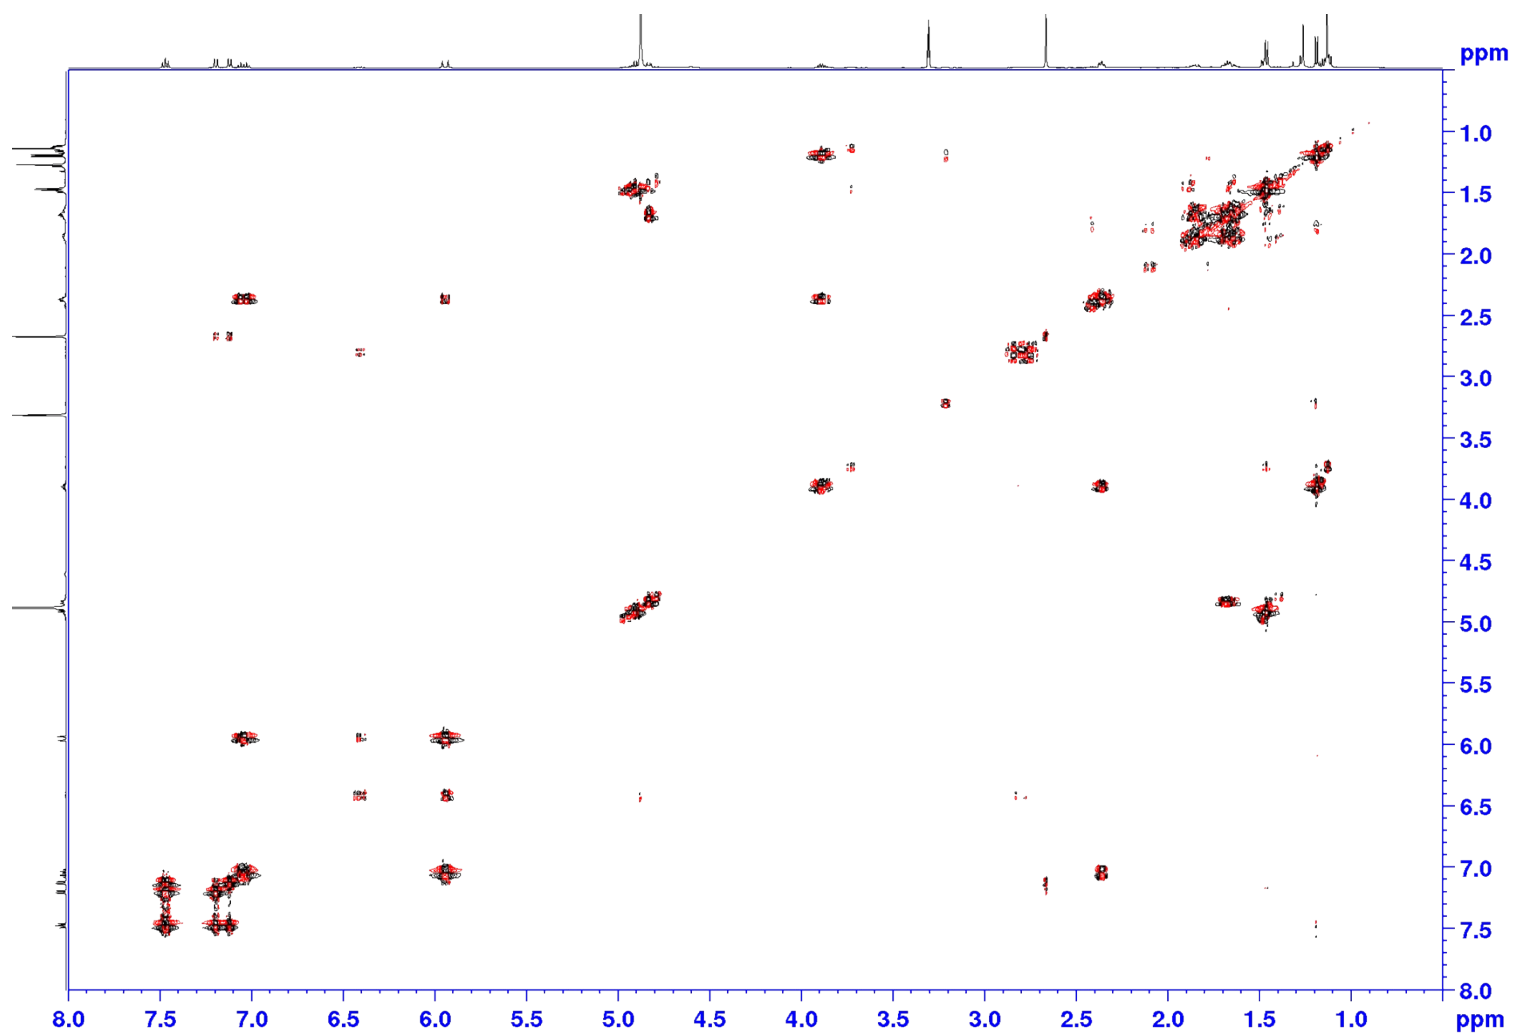

Figure S30.  $^1\text{H}$ - $^1\text{H}$  COSY spectrum of *Gerberdriasin C* (**3**) in  $\text{CD}_3\text{OD}$

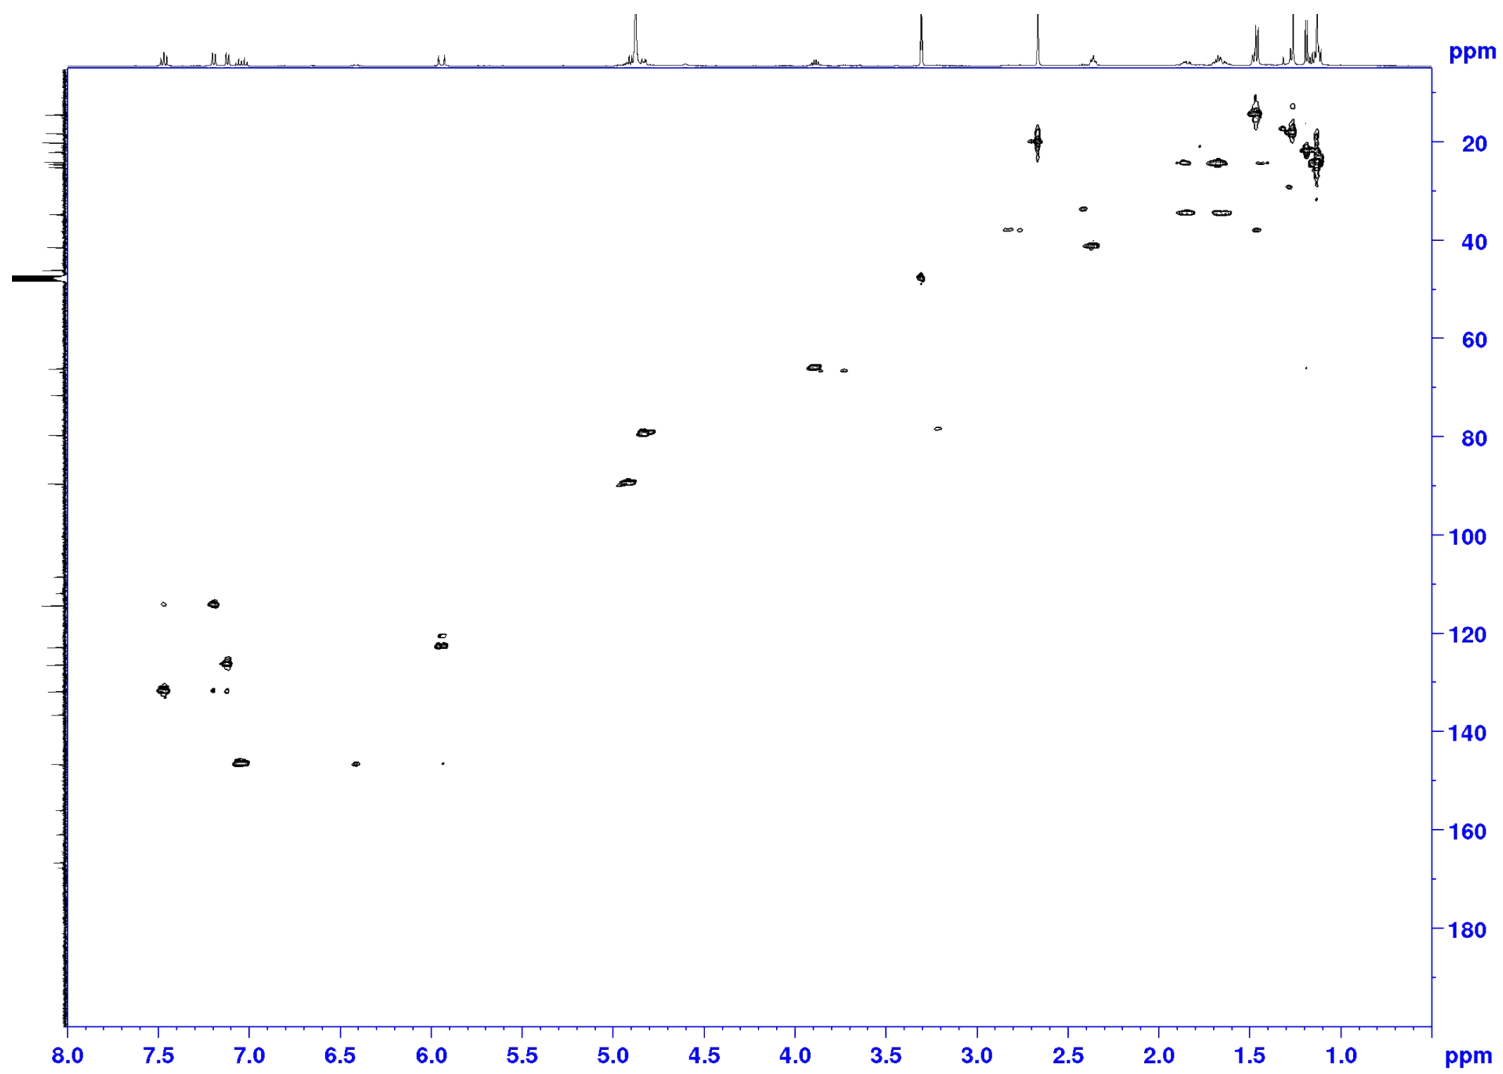

Figure S31. HSQC spectrum of *Gerberdriasin C (3)* in CD<sub>3</sub>OD

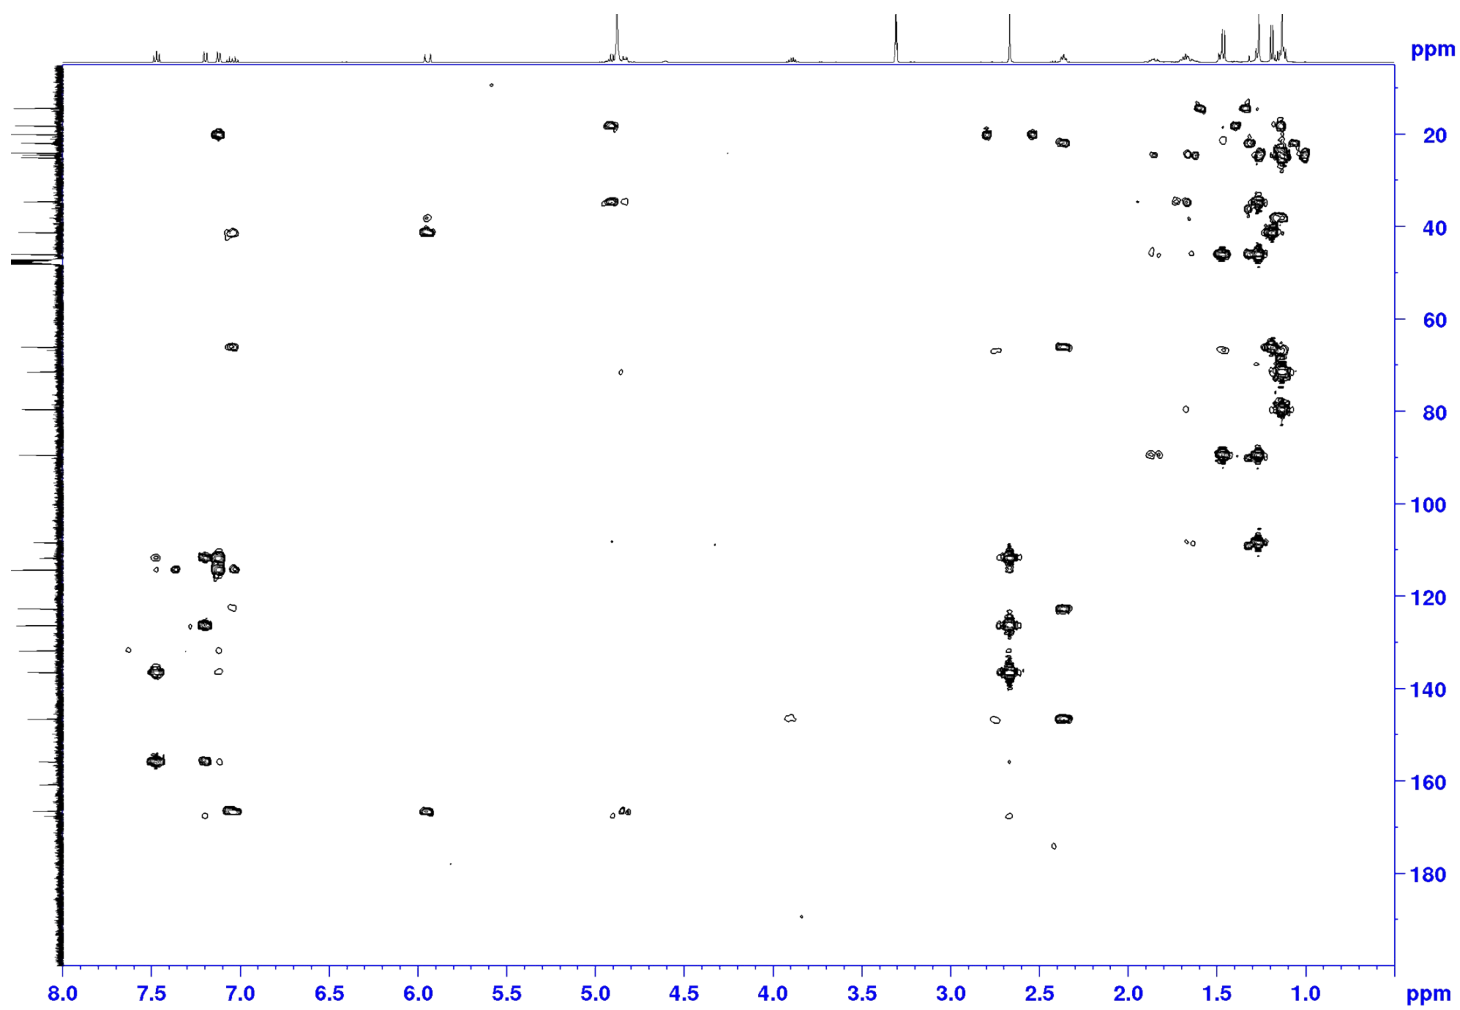

Figure S32. HMBC spectrum of *Gerberdriasin C* (**3**) in CD<sub>3</sub>OD

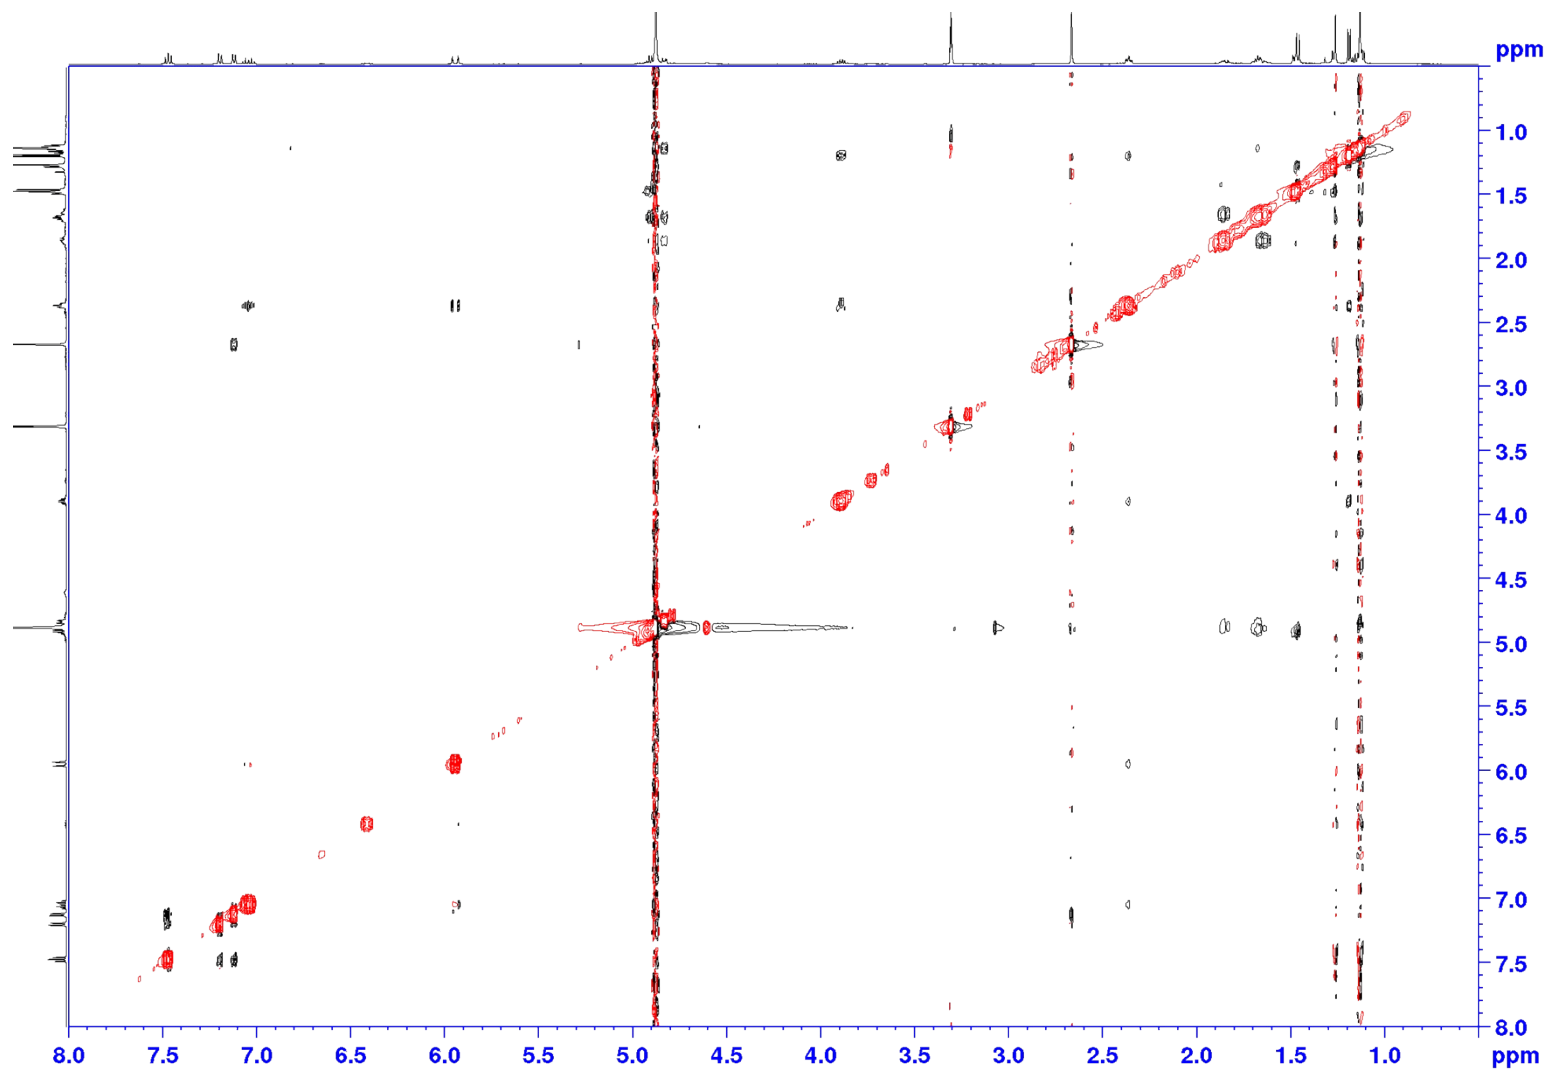

Figure S33. NOESY spectrum of *Gerberdriasin C* (3) in CD<sub>3</sub>OD

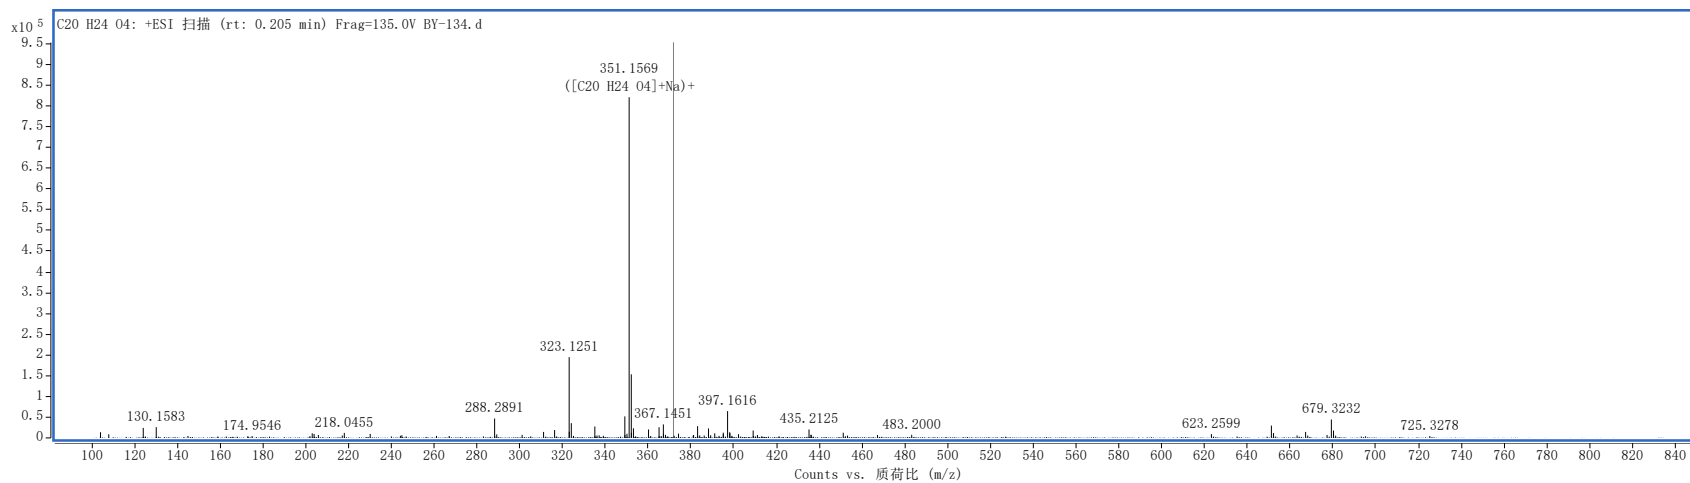

| 峰高总百分比 (Calc) | 峰高 (计算值) | 峰高百分数(计算值) | m/z (Calc) | Diff (mDa) | 峰高       | 峰高百分数 | 峰高总百分比 | m/z      | Diff (ppm) |
|---------------|----------|------------|------------|------------|----------|-------|--------|----------|------------|
| 79.9          | 796654.4 | 100        | 351.1567   | -0.2       | 821034.6 | 100   | 82.3   | 351.1569 | -0.67      |

| 最佳   | ID 来源 | 分子式        | 种类      | m/z      | 分数    | Diff (ppm) | 分数 (MFG) |
|------|-------|------------|---------|----------|-------|------------|----------|
| TRUE | MFG   | C20 H24 O4 | (M+Na)+ | 351.1569 | 96.79 | -0.27      | 96.79    |

Figure S34. HRESIMS spectrum of *Gerberdriasin D (4)*

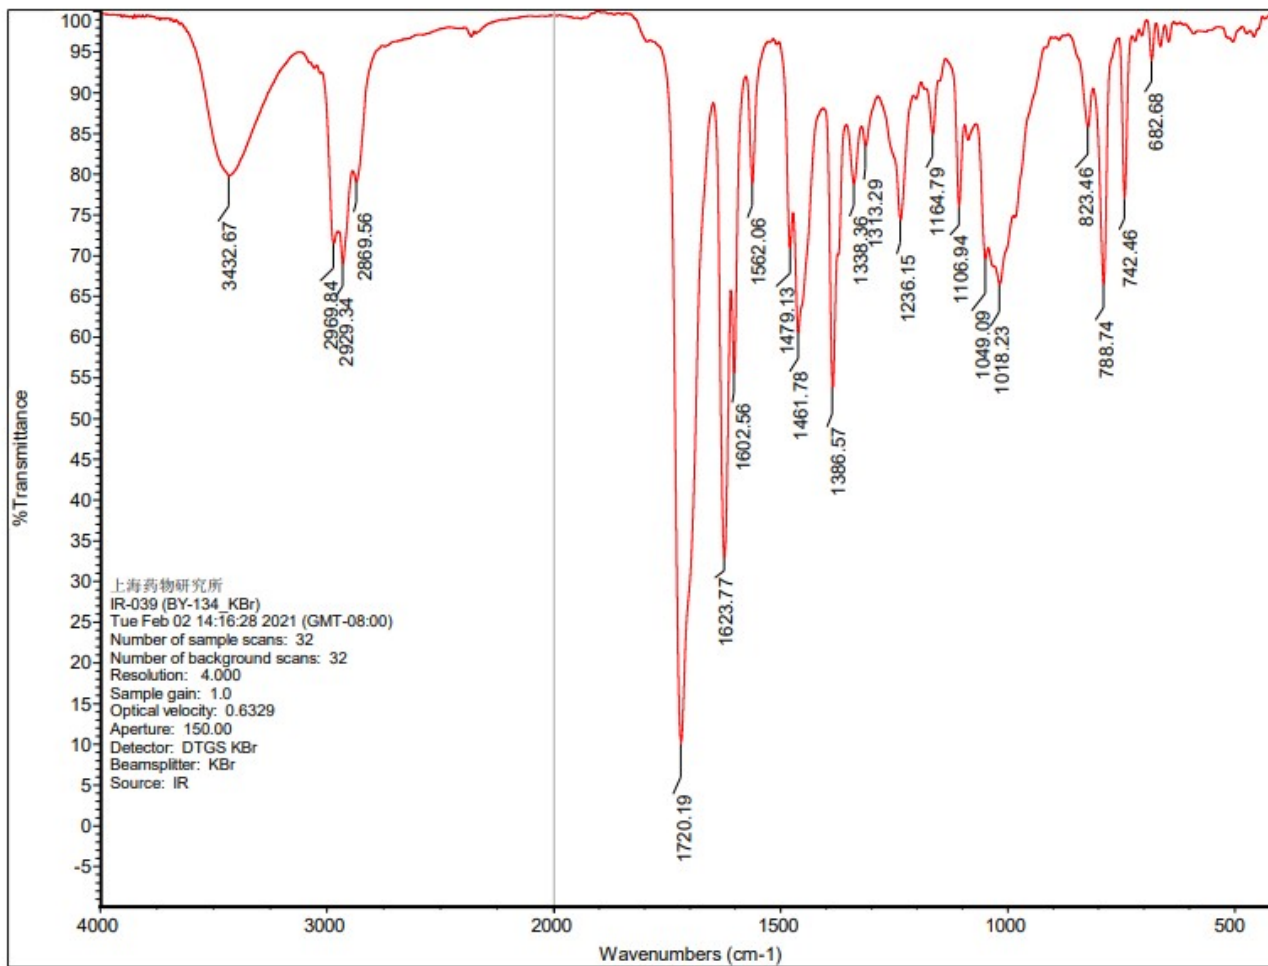

Figure S35. IR spectrum of *Gerberdriasin D* (4)

**Rudolph Research Analytical**

Thursday, 02/04/2021

This sample was measured on an Autopol VI, serial number 90079,  
manufactured by Rudolph Research Analytical, Hackettstown, NJ.

LotID : BY-134  
Set Temperature : 20.0  
Temp Corr : OFF

|          |                |                 |                |                |
|----------|----------------|-----------------|----------------|----------------|
| <b>n</b> | <b>Average</b> | <b>Std.Dev.</b> | <b>Maximum</b> | <b>Minimum</b> |
| 6        | 13.333         | 0.0000          | 13.333         | 13.333         |

| S.No | Sample ID | Time        | Result | Scale | OR ° Arc | WLG | Lg.mm  | Conc. | Temp. | Comment |
|------|-----------|-------------|--------|-------|----------|-----|--------|-------|-------|---------|
| 1    | BY-134    | 10:59:06 AM | 13.333 | SR    | 0.008    | 589 | 100.00 | 0.060 | 20.3  |         |
| 2    | BY-134    | 10:59:12 AM | 13.333 | SR    | 0.008    | 589 | 100.00 | 0.060 | 20.3  |         |
| 3    | BY-134    | 10:59:19 AM | 13.333 | SR    | 0.008    | 589 | 100.00 | 0.060 | 20.3  |         |
| 4    | BY-134    | 10:59:25 AM | 13.333 | SR    | 0.008    | 589 | 100.00 | 0.060 | 20.3  |         |
| 5    | BY-134    | 10:59:32 AM | 13.333 | SR    | 0.008    | 589 | 100.00 | 0.060 | 20.3  |         |
| 6    | BY-134    | 10:59:39 AM | 13.333 | SR    | 0.008    | 589 | 100.00 | 0.060 | 20.3  |         |

\_\_\_\_\_  
Signature

**Figure S36. OR Value of *Gerberdriasin D (4)* in CH<sub>3</sub>OH**



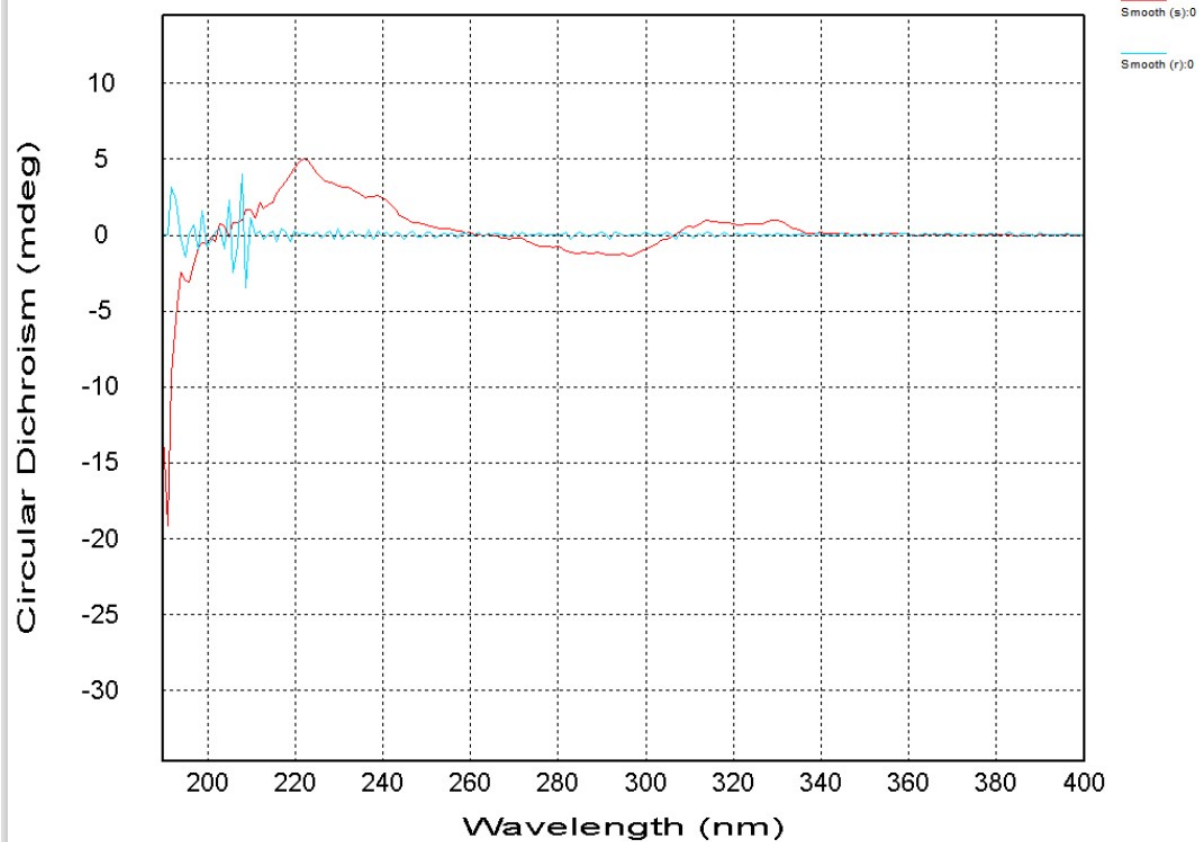

Figure S37. CD spectra of *Gerberdriasin D (4)* in CH<sub>3</sub>OH

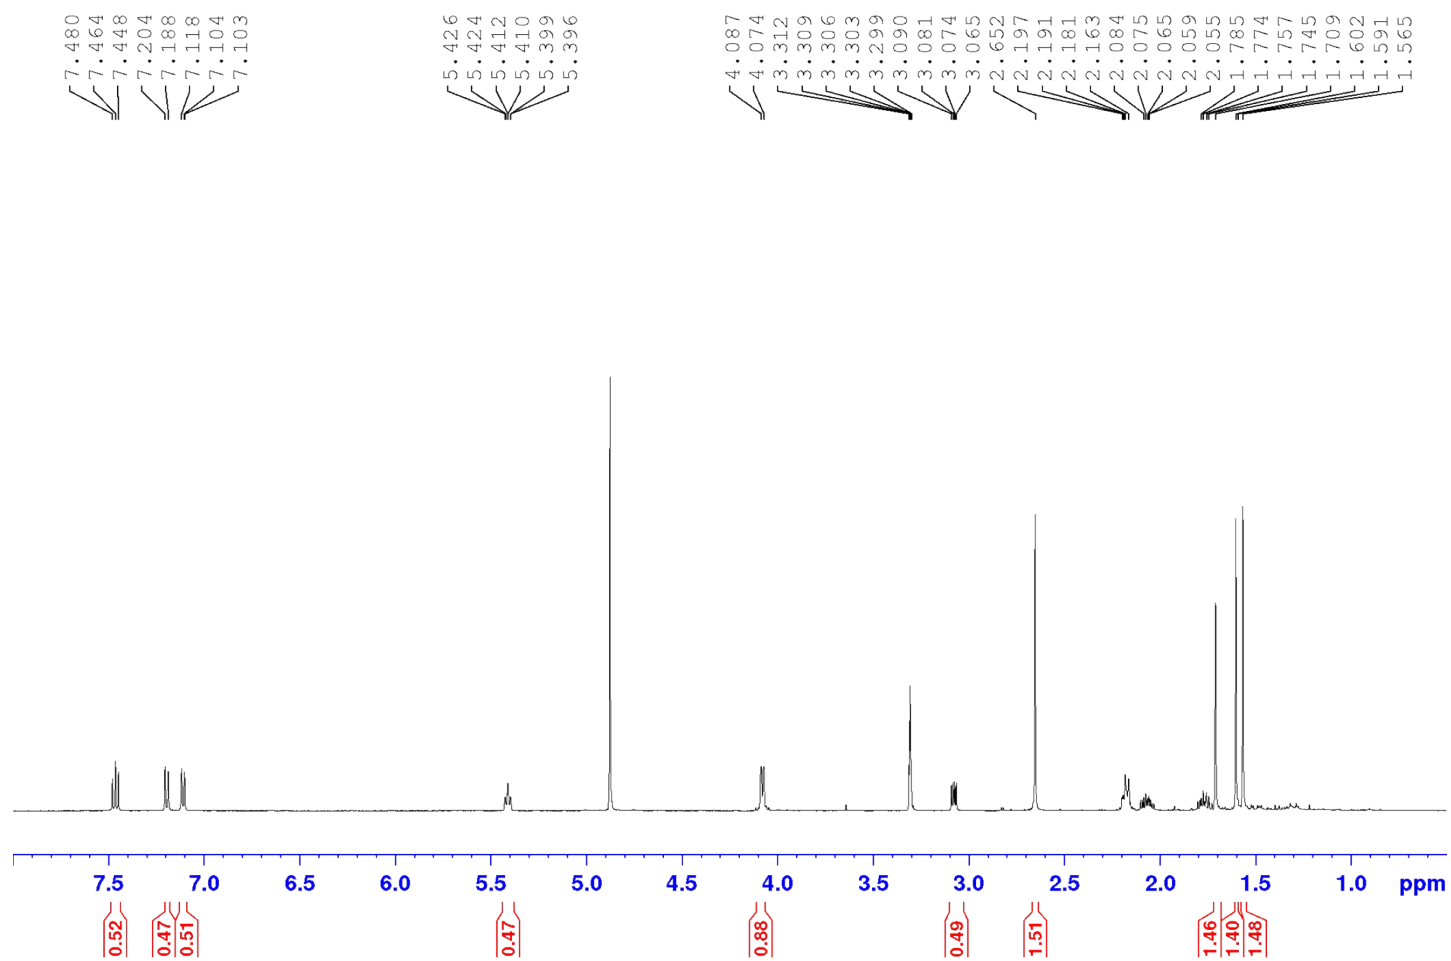

Figure S38.  $^1\text{H}$  NMR spectrum of *Gerberdriasin D (4)* in  $\text{CD}_3\text{OD}$

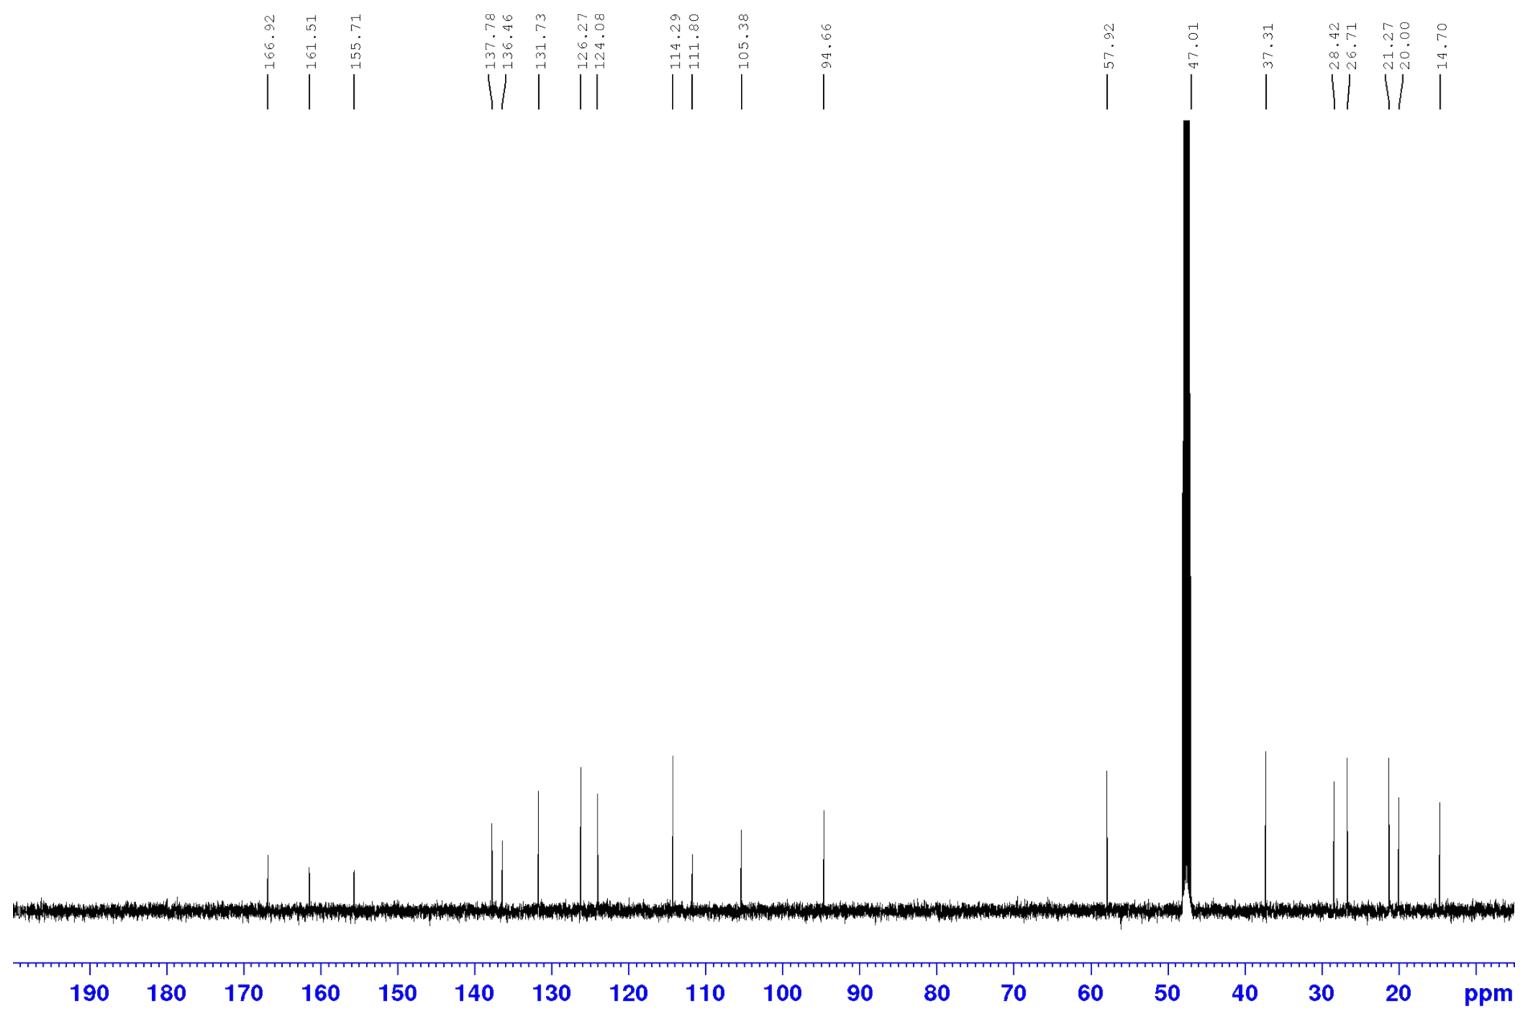

Figure S39.  $^{13}\text{C}$  NMR spectrum of *Gerberdriasin D (4)* in  $\text{CD}_3\text{OD}$

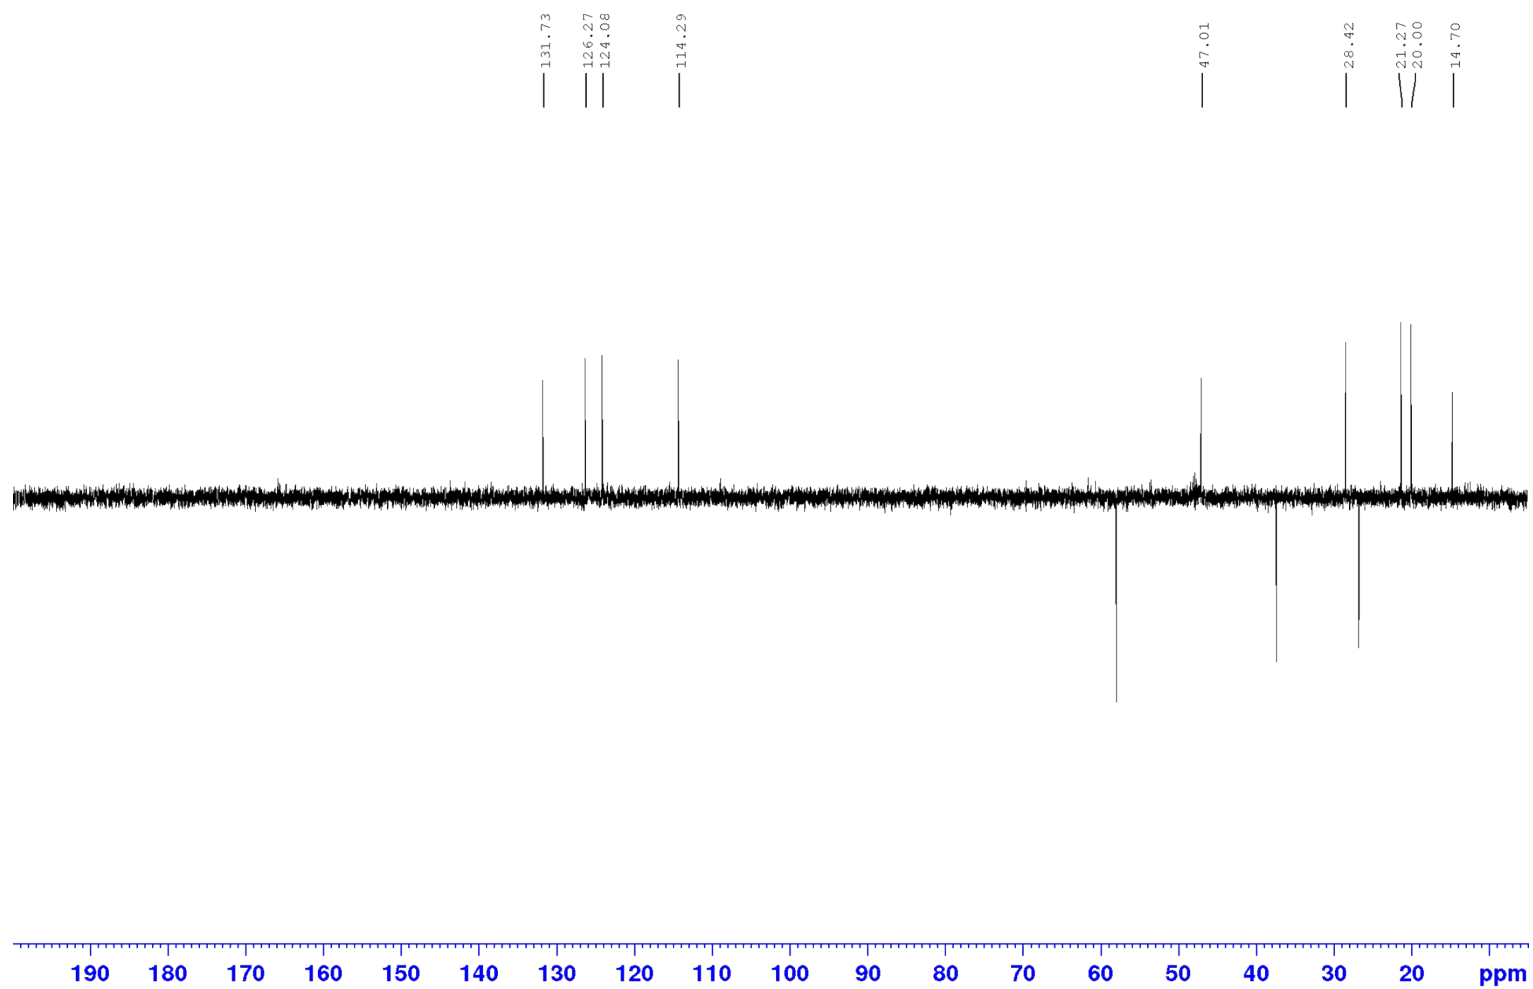

Figure S40. DEPT-135 NMR spectrum of *Gerberdriasin D (4)* in CD<sub>3</sub>OD

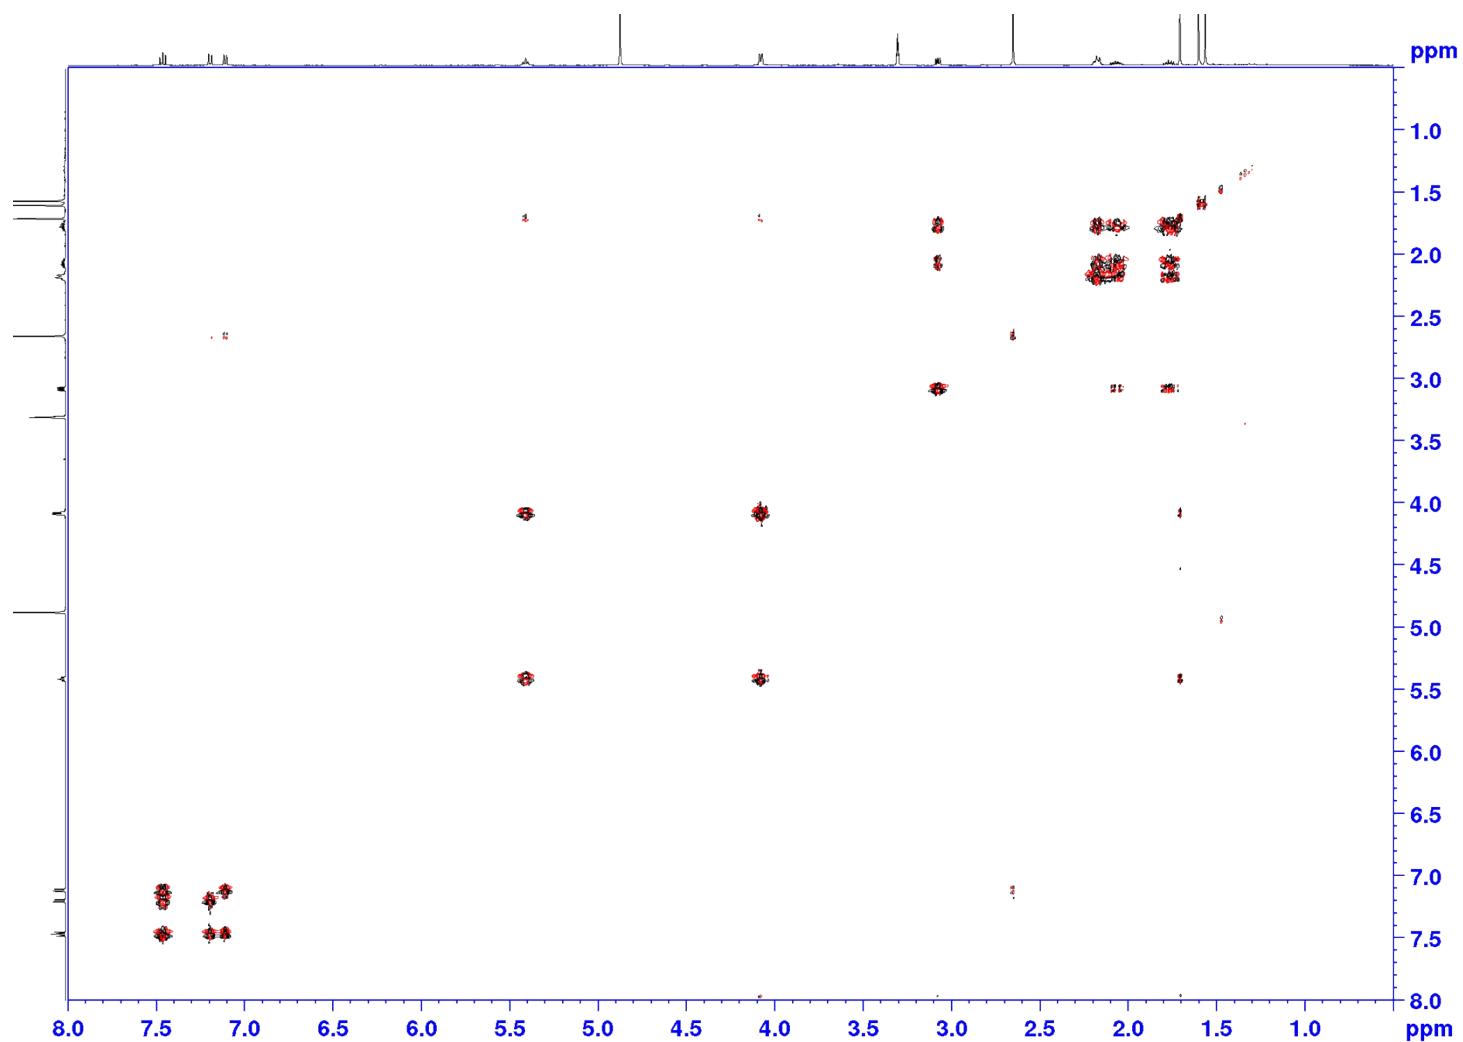

Figure S41.  $^1\text{H}$ - $^1\text{H}$  COSY spectrum of *Gerberdriasin D* (4) in  $\text{CD}_3\text{OD}$

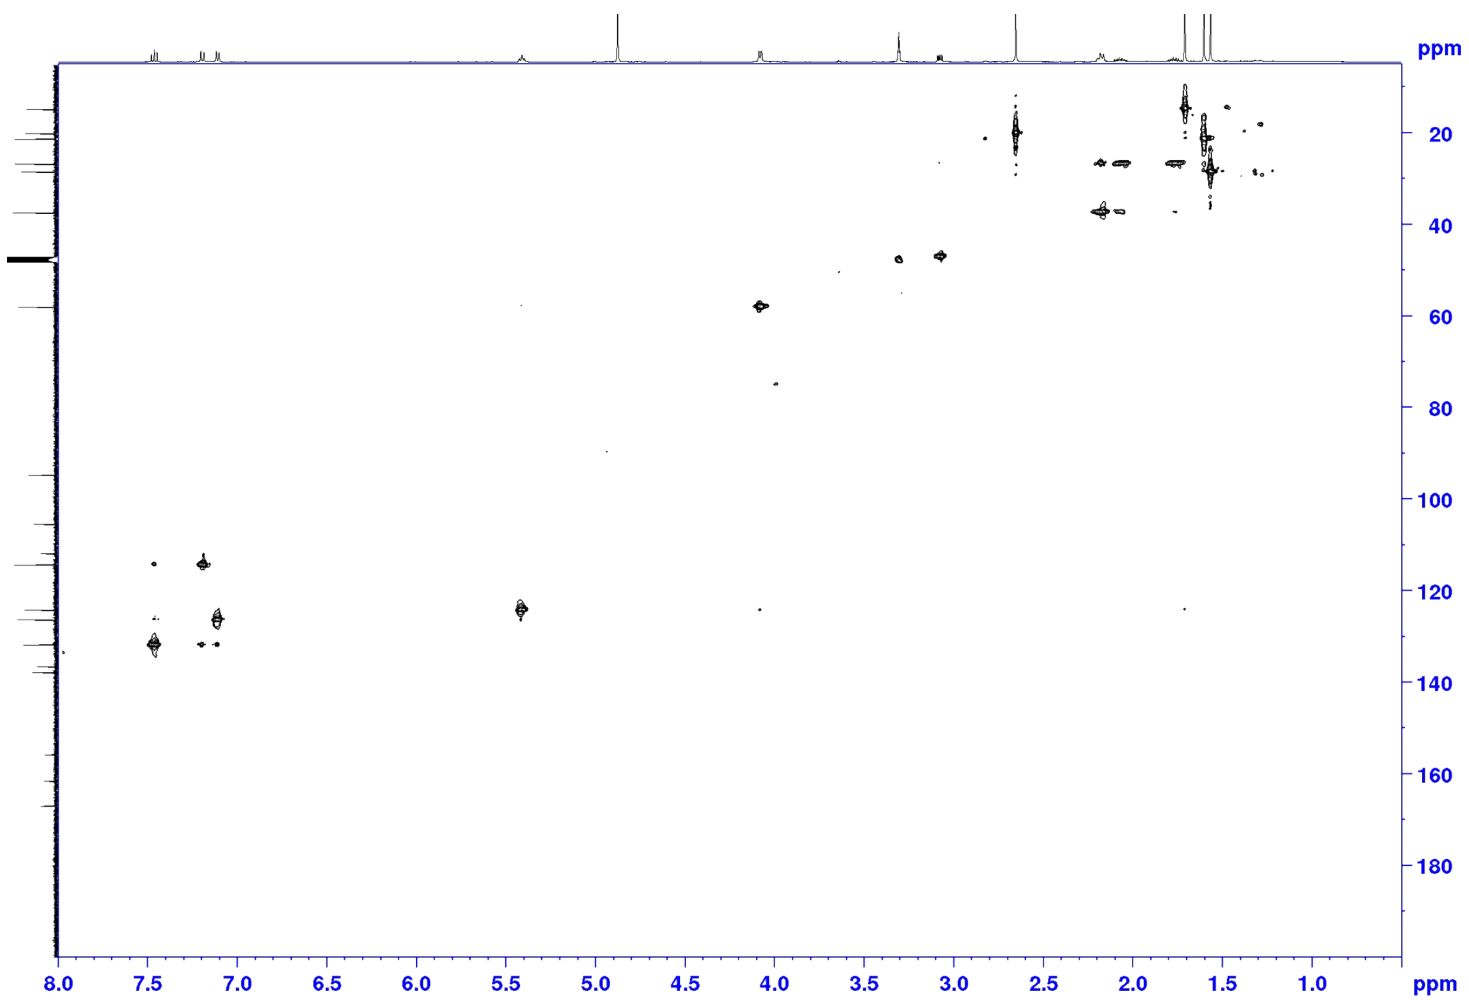

Figure S42. HSQC spectrum of *Gerberdriasin D (4)* in CD<sub>3</sub>OD

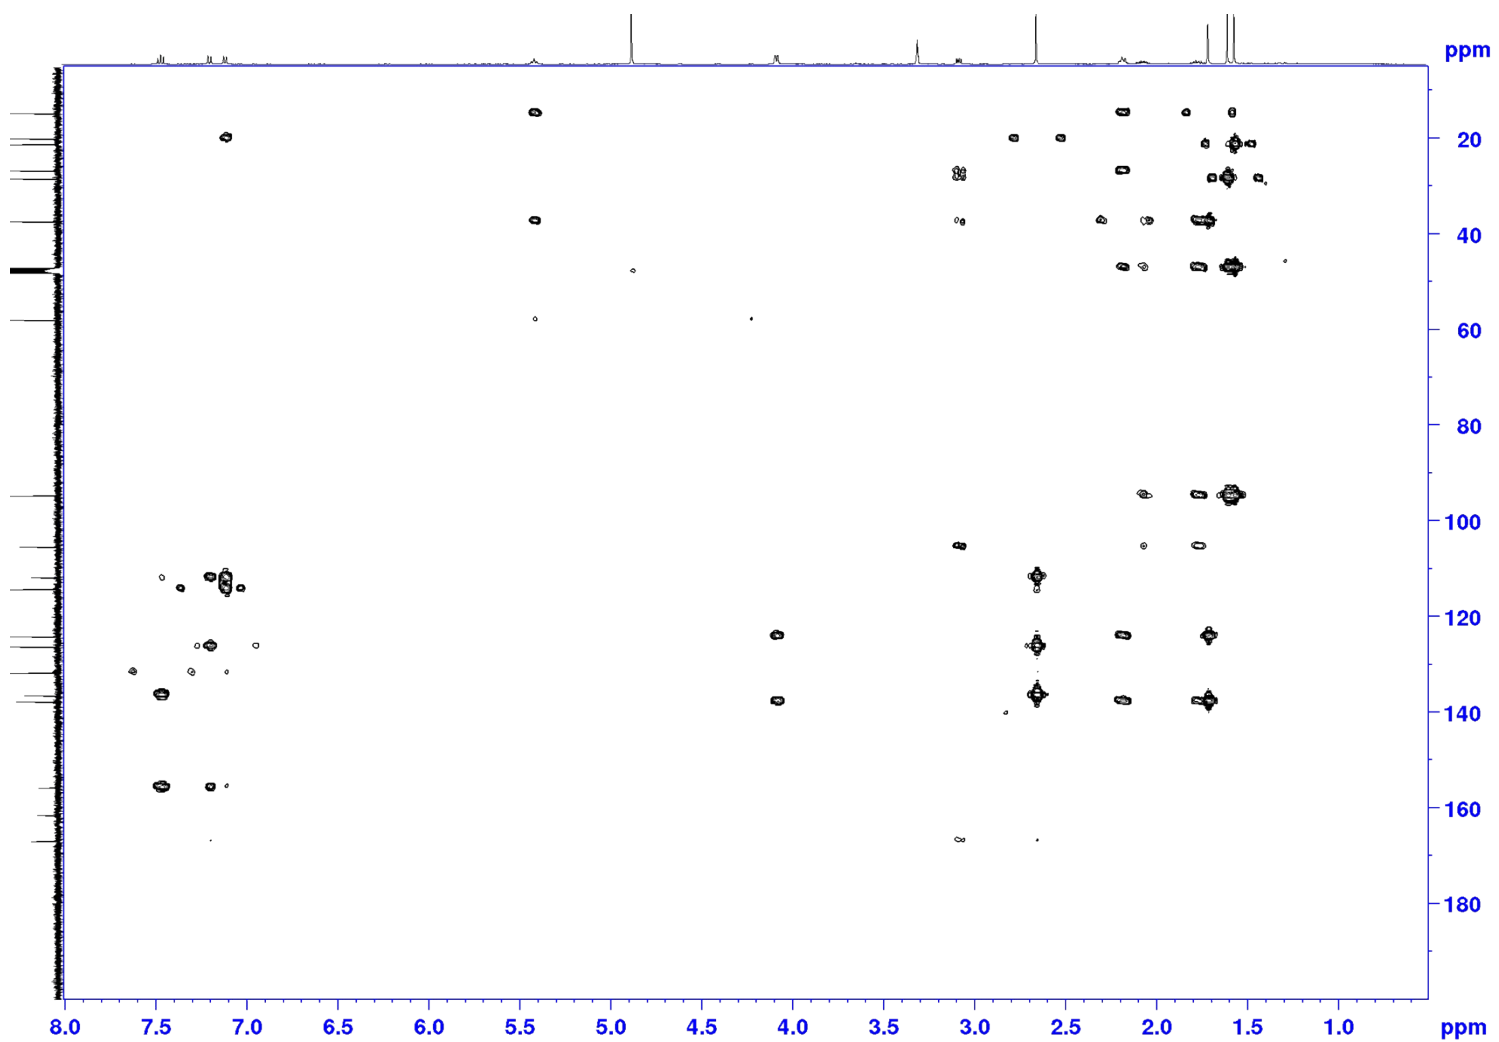

Figure S43. HMBC spectrum of *Gerberdriasin D (4)* in  $\text{CD}_3\text{OD}$

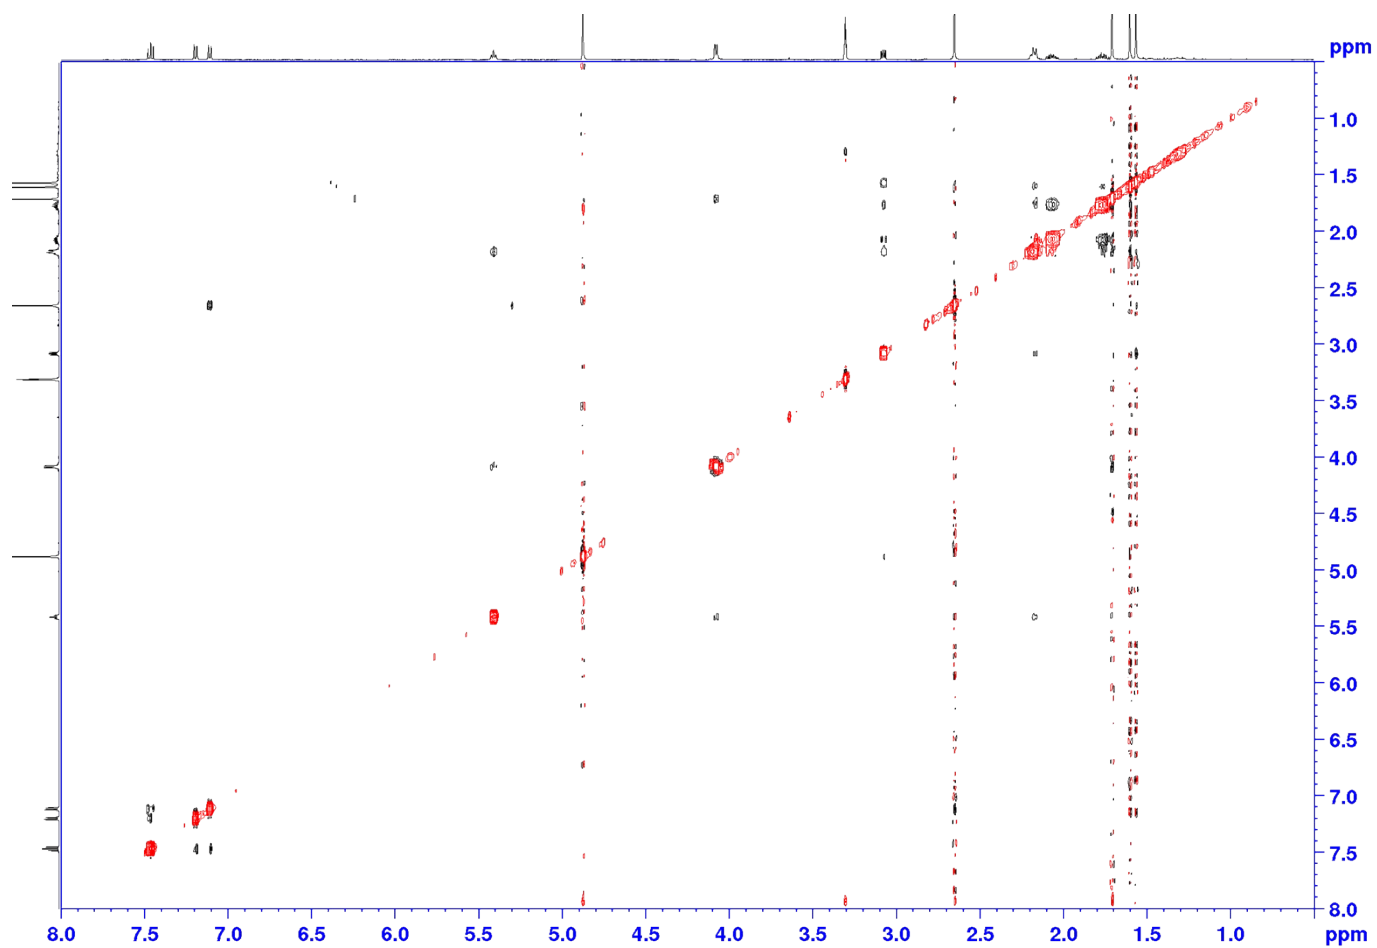

Figure S44. NOESY spectrum of *Gerberdriasin D (4)* in CD<sub>3</sub>OD



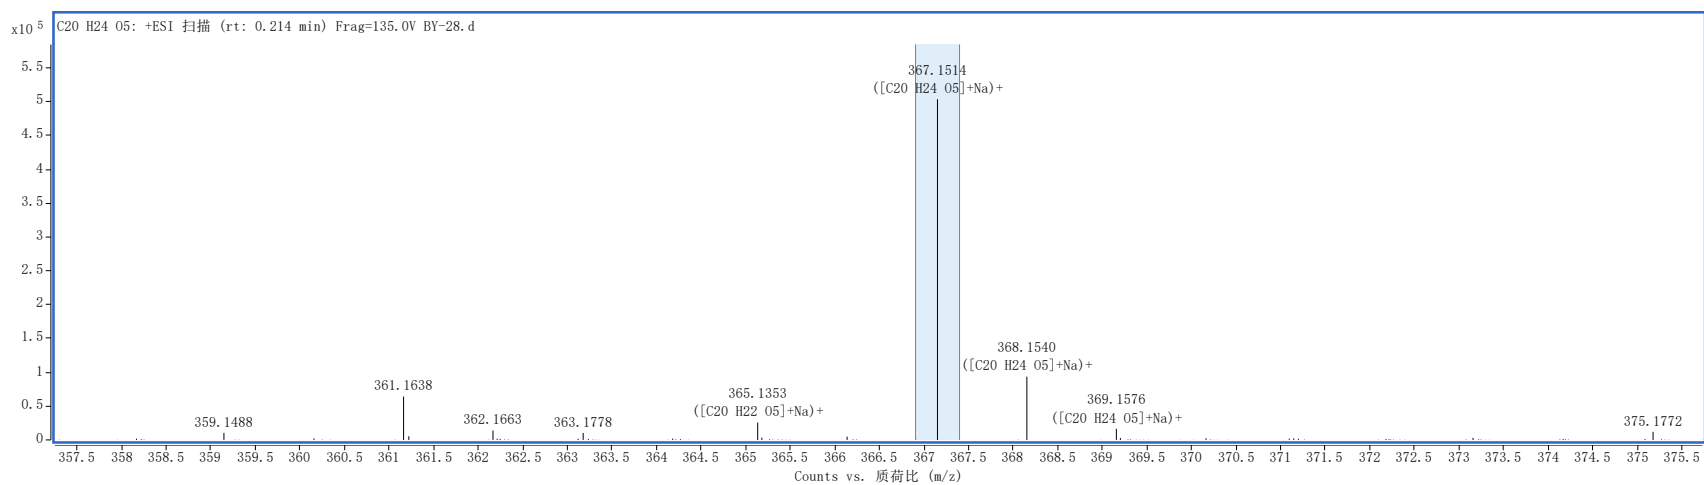

| 峰高总百分比 (Calc) | 峰高 (计算值) | 峰高百分数(计算值) | m/z (Calc) | Diff (mDa) | 峰高     | 峰高百分数 | 峰高总百分比 | m/z      | Diff (ppm) |
|---------------|----------|------------|------------|------------|--------|-------|--------|----------|------------|
| 79.7          | 489192.6 | 100        | 367.1516   | 0.2        | 503858 | 100   | 82.1   | 367.1514 | 0.48       |

| 最佳   | ID 来源 | 分子式        | 种类      | m/z      | 分数    | Diff (ppm) | 分数 (MFG) |
|------|-------|------------|---------|----------|-------|------------|----------|
| TRUE | MFG   | C20 H24 O5 | (M+Na)+ | 367.1514 | 96.32 | 0.86       | 96.32    |

Figure S45. HRESIMS spectrum of *Gerberdriasin E (5)*

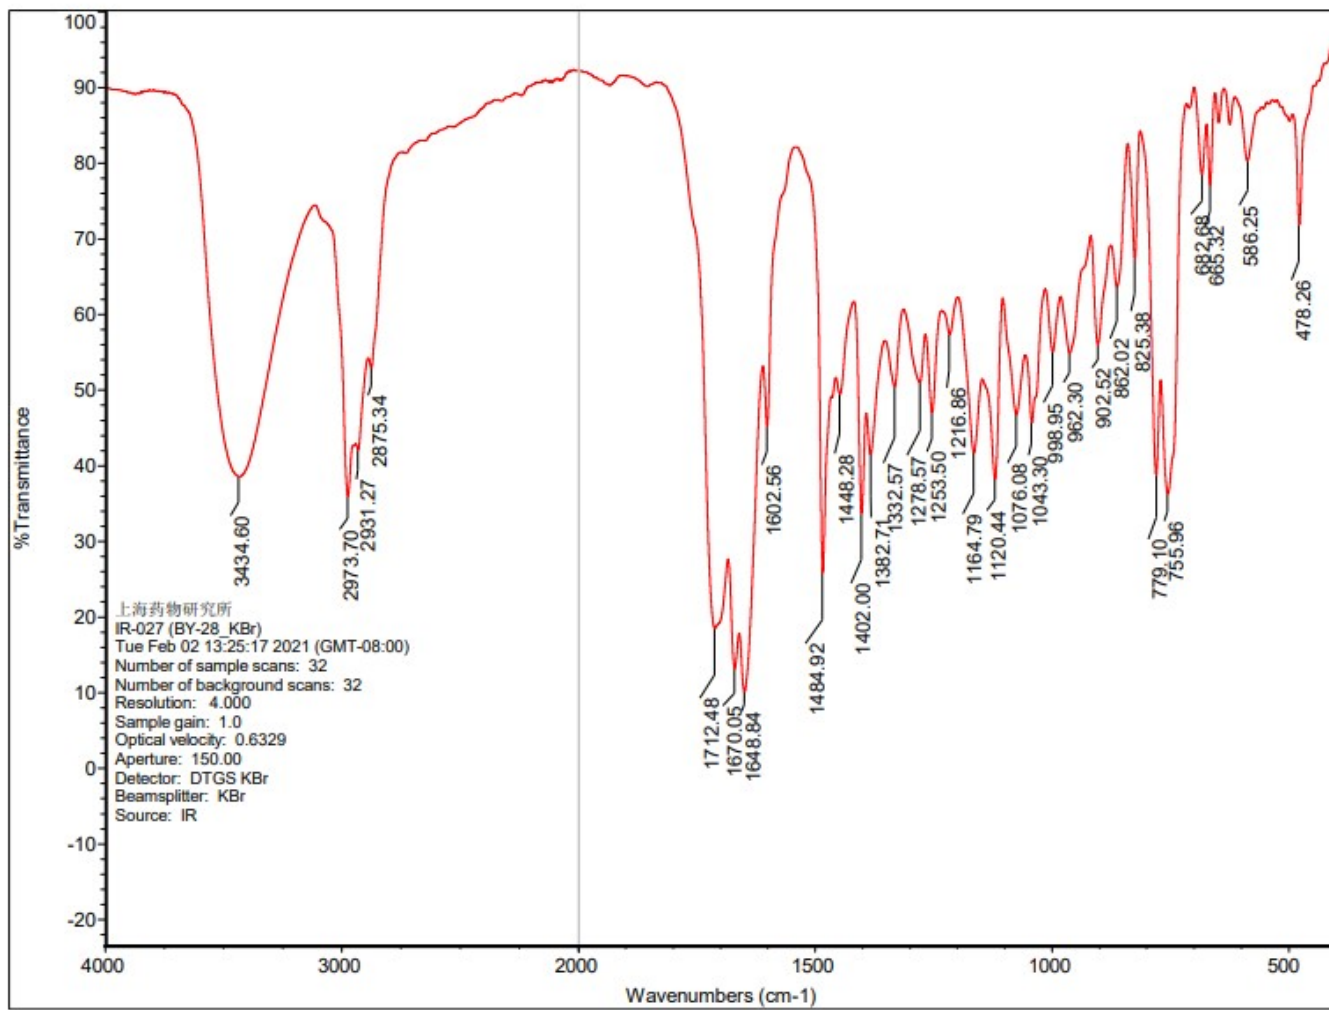

Figure S46. IR spectrum of *Gerberdriasin E* (5)

### Rudolph Research Analytical

Thursday, 02/24/2022

This sample was measured on an Autopol VI, serial number 90079, manufactured by Rudolph Research Analytical, Hackettstown, NJ.

LotID : 28-1

Set Temperature : 20.0

Temp Corr : OFF

| n | Average | Std.Dev.    | Maximum | Minimum |        |           |        |        |       |          |     |       |       |       |         |
|---|---------|-------------|---------|---------|--------|-----------|--------|--------|-------|----------|-----|-------|-------|-------|---------|
| 6 | -16.000 | 0.0000      | -16.000 | -16.000 | S.No   | Sample ID | Time   | Result | Scale | OR ° Arc | WLG | Lg.mm | Conc. | Temp. | Comment |
| 1 | 28-1    | 10:47:06 AM | -16.000 | SR      | -0.004 | 589       | 100.00 | 0.025  | 20.2  |          |     |       |       |       |         |
| 2 | 28-1    | 10:47:12 AM | -16.000 | SR      | -0.004 | 589       | 100.00 | 0.025  | 20.2  |          |     |       |       |       |         |
| 3 | 28-1    | 10:47:12 AM | -16.000 | SR      | -0.004 | 589       | 100.00 | 0.025  | 20.2  |          |     |       |       |       |         |
| 4 | 28-1    | 10:47:18 AM | -16.000 | SR      | -0.004 | 589       | 100.00 | 0.025  | 20.1  |          |     |       |       |       |         |
| 5 | 28-1    | 10:47:24 AM | -16.000 | SR      | -0.004 | 589       | 100.00 | 0.025  | 20.1  |          |     |       |       |       |         |
| 6 | 28-1    | 10:47:30 AM | -16.000 | SR      | -0.004 | 589       | 100.00 | 0.025  | 20.1  |          |     |       |       |       |         |

\_\_\_\_\_  
Signature

**Figure S47. OR Value of *Gerberdriasin E (5)* in CH<sub>3</sub>OH**

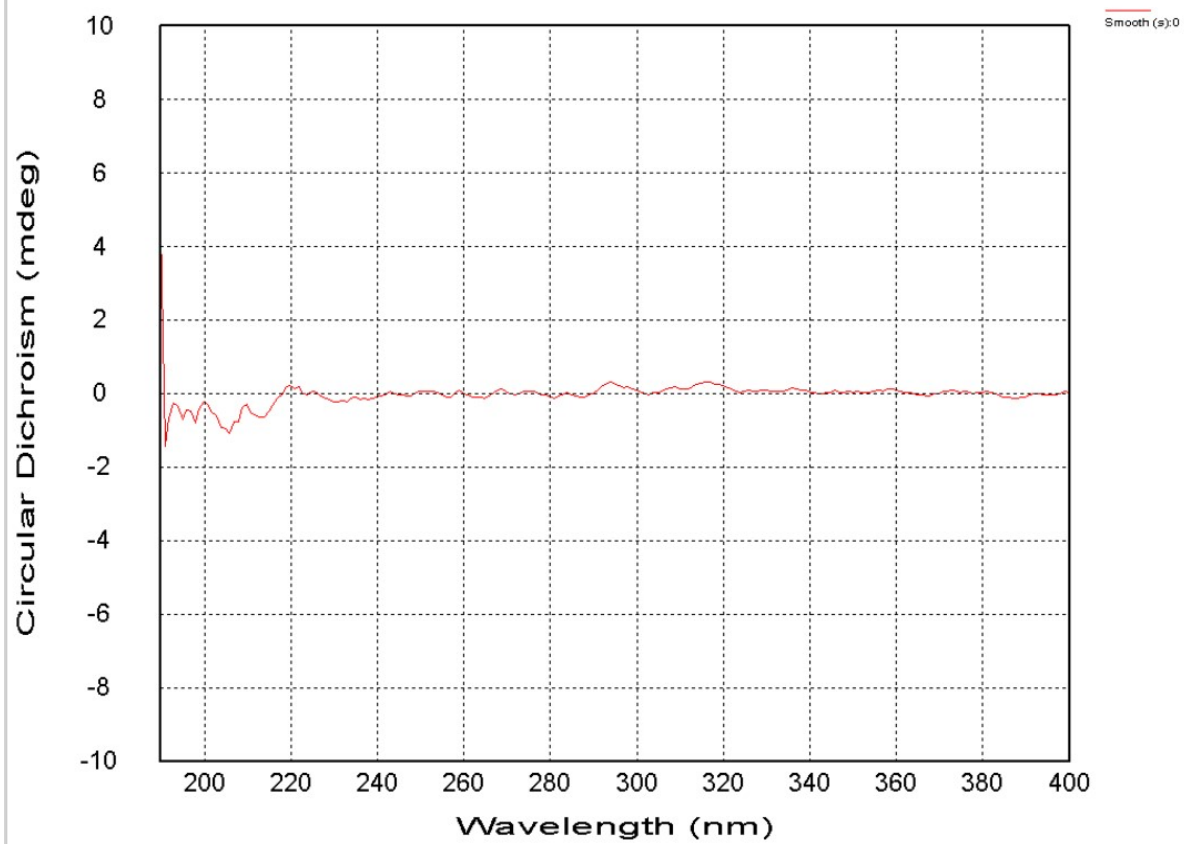

Figure S48. CD spectra of *Gerberdriasin E (5)* in CH<sub>3</sub>OH

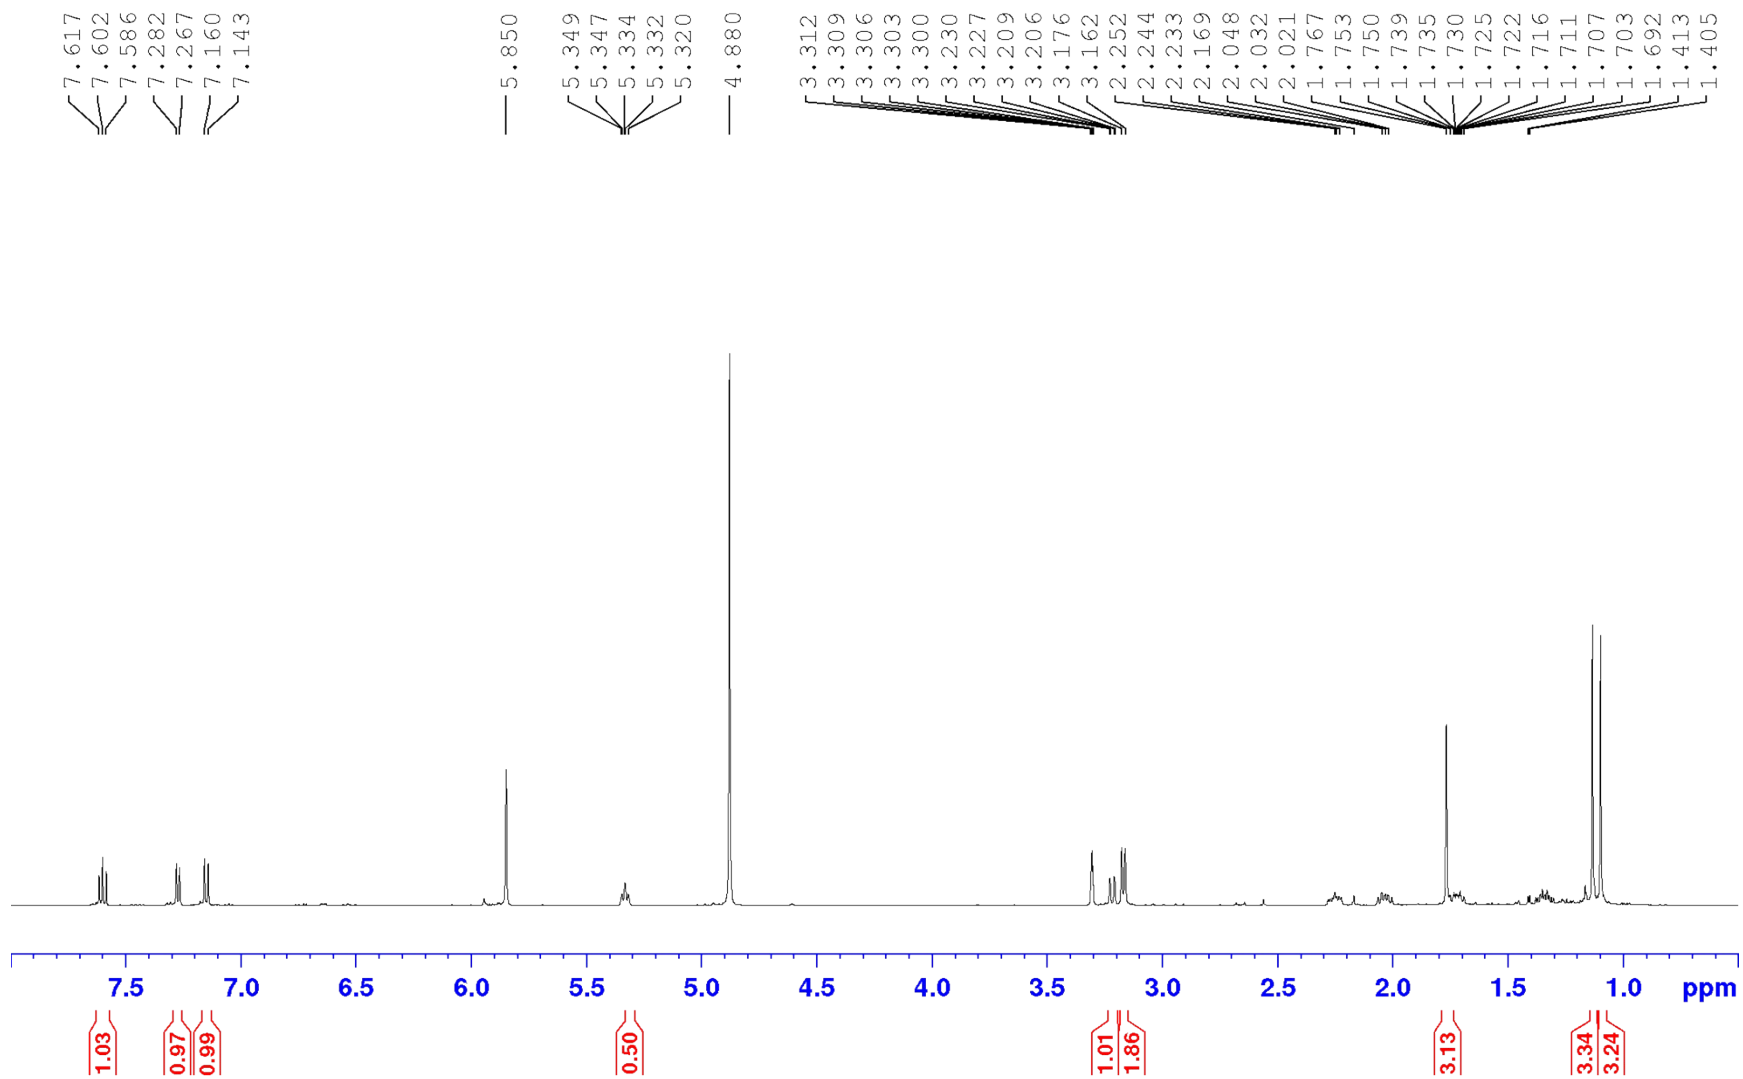

Figure S49. <sup>1</sup>H NMR spectrum of *Gerberdriasin E (5)* in CD<sub>3</sub>OD

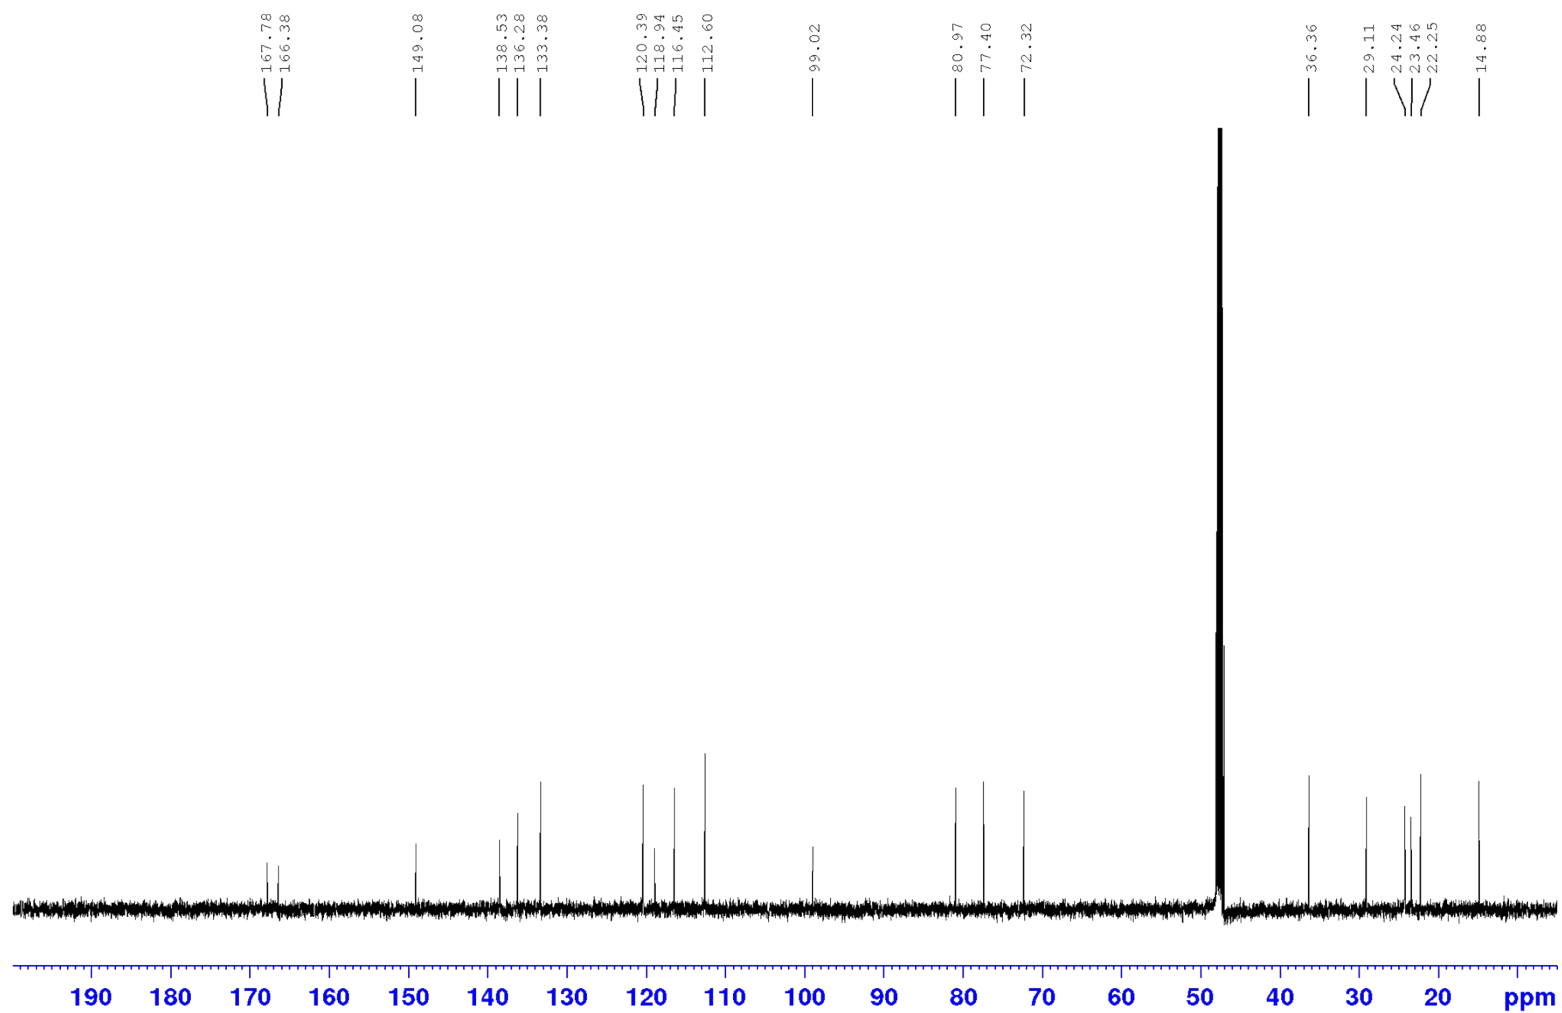

Figure S50.  $^{13}\text{C}$  NMR spectrum of *Gerberdriasin E (5)* in  $\text{CD}_3\text{OD}$

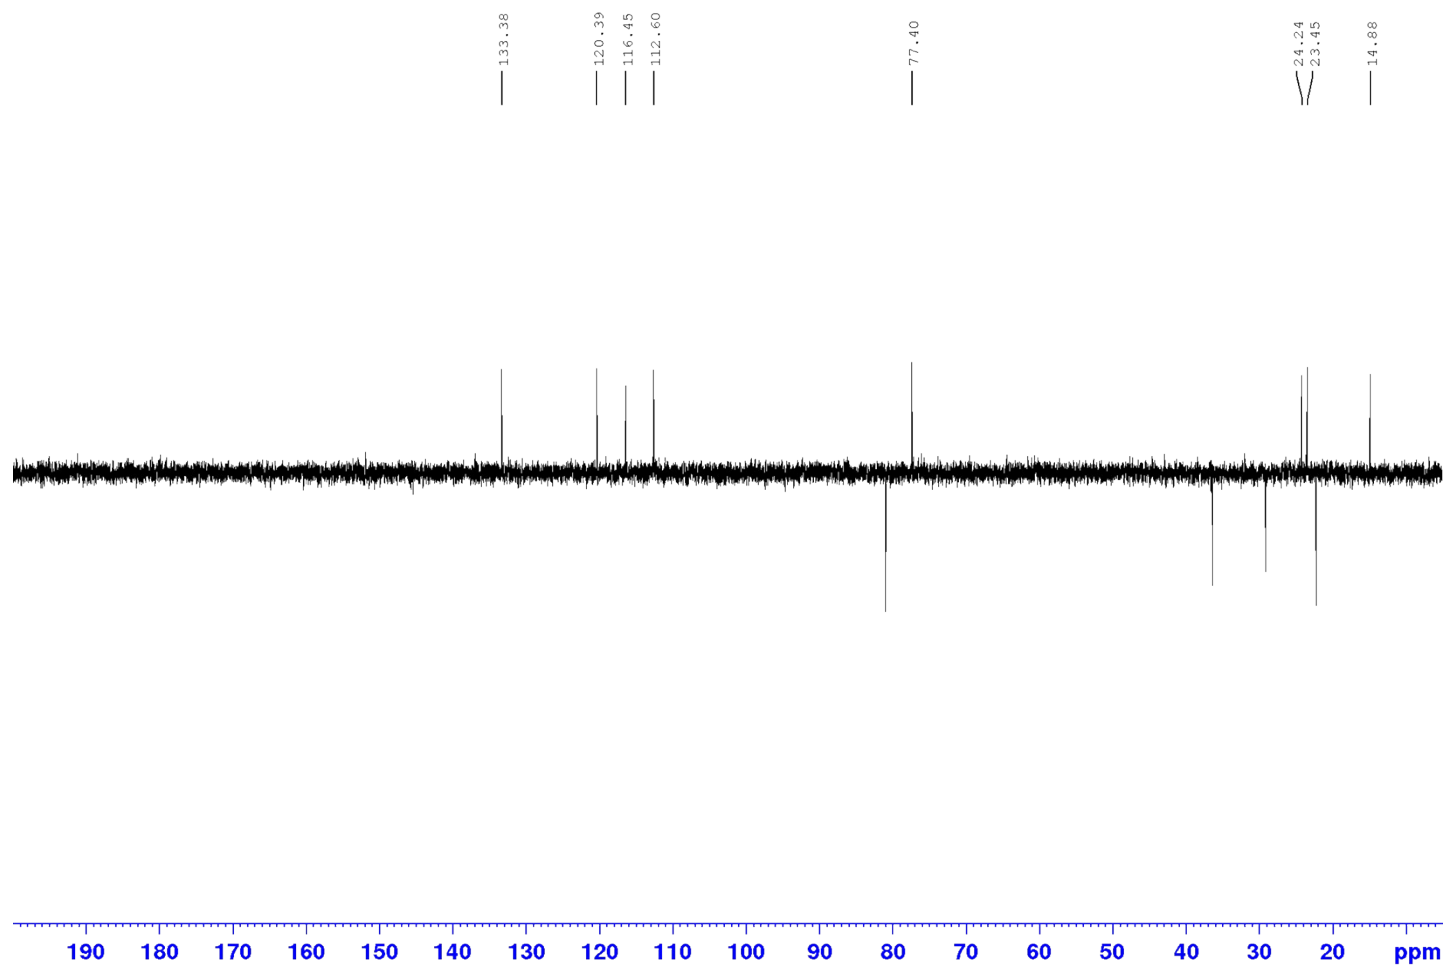

Figure S51. DEPT-135 NMR spectrum of *Gerberdriasin E (5)* in CD<sub>3</sub>OD

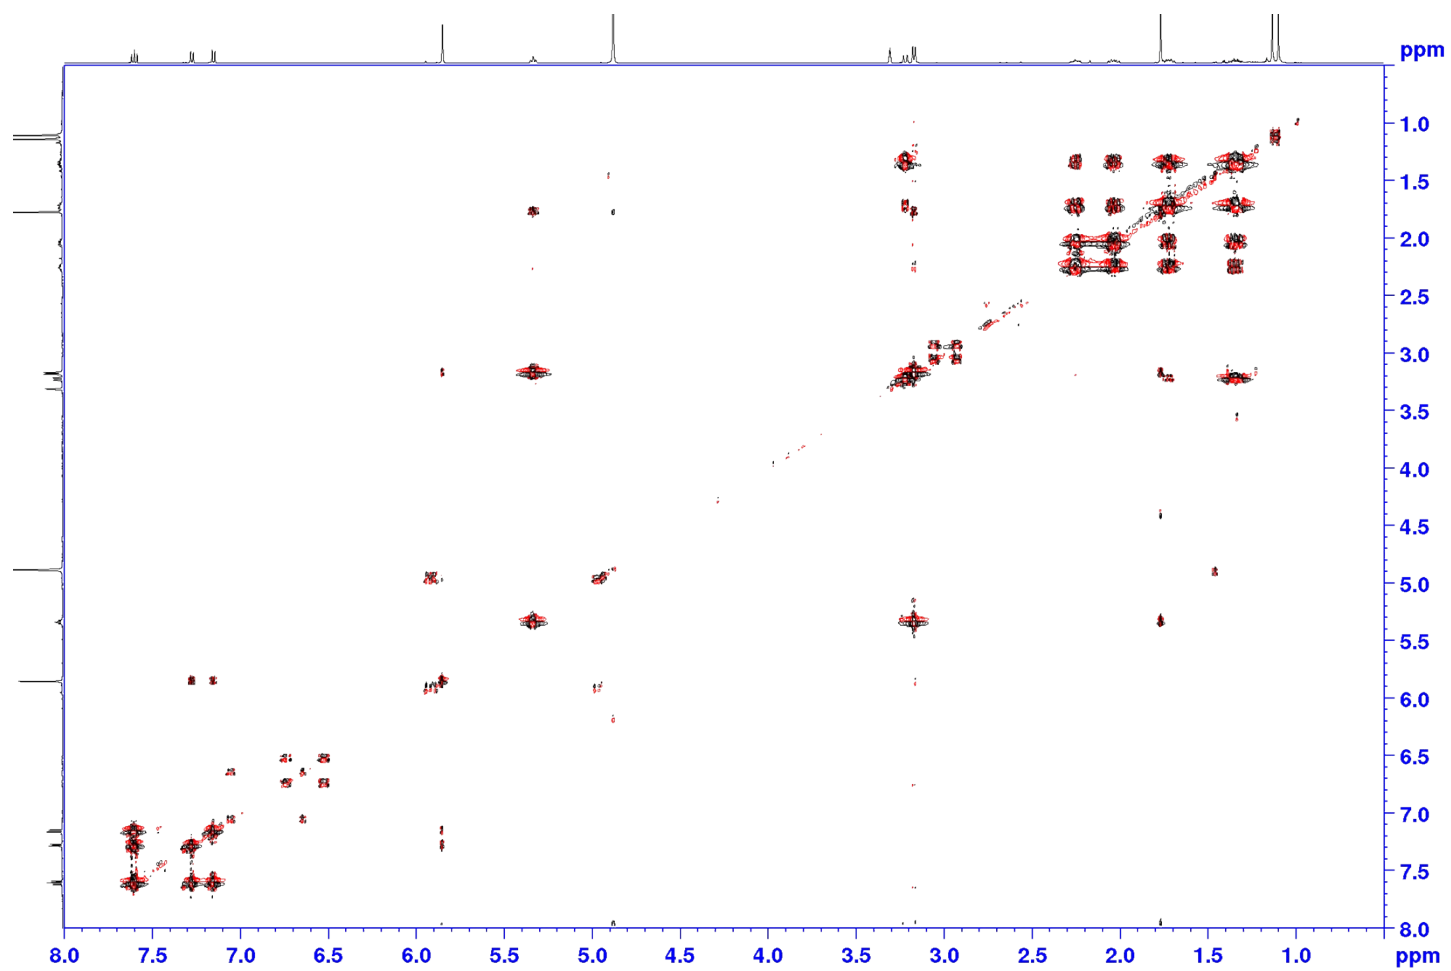

Figure S52.  $^1\text{H}$ - $^1\text{H}$  COSY spectrum of *Gerberdriasin E (5)* in  $\text{CD}_3\text{OD}$



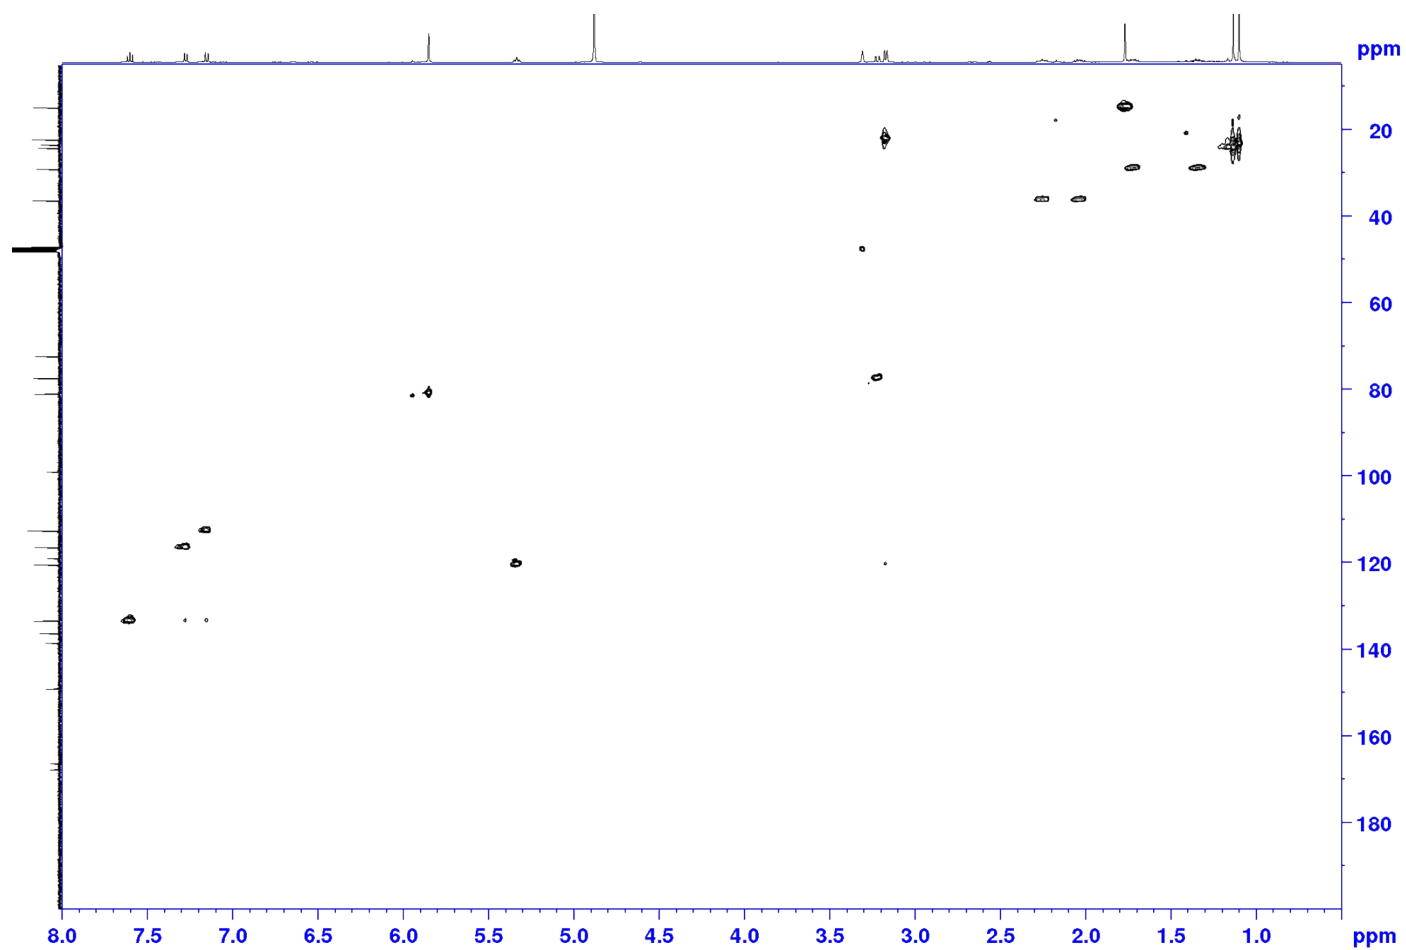

Figure S53. HSQC spectrum of *Gerberdriasin E (5)* in CD<sub>3</sub>OD

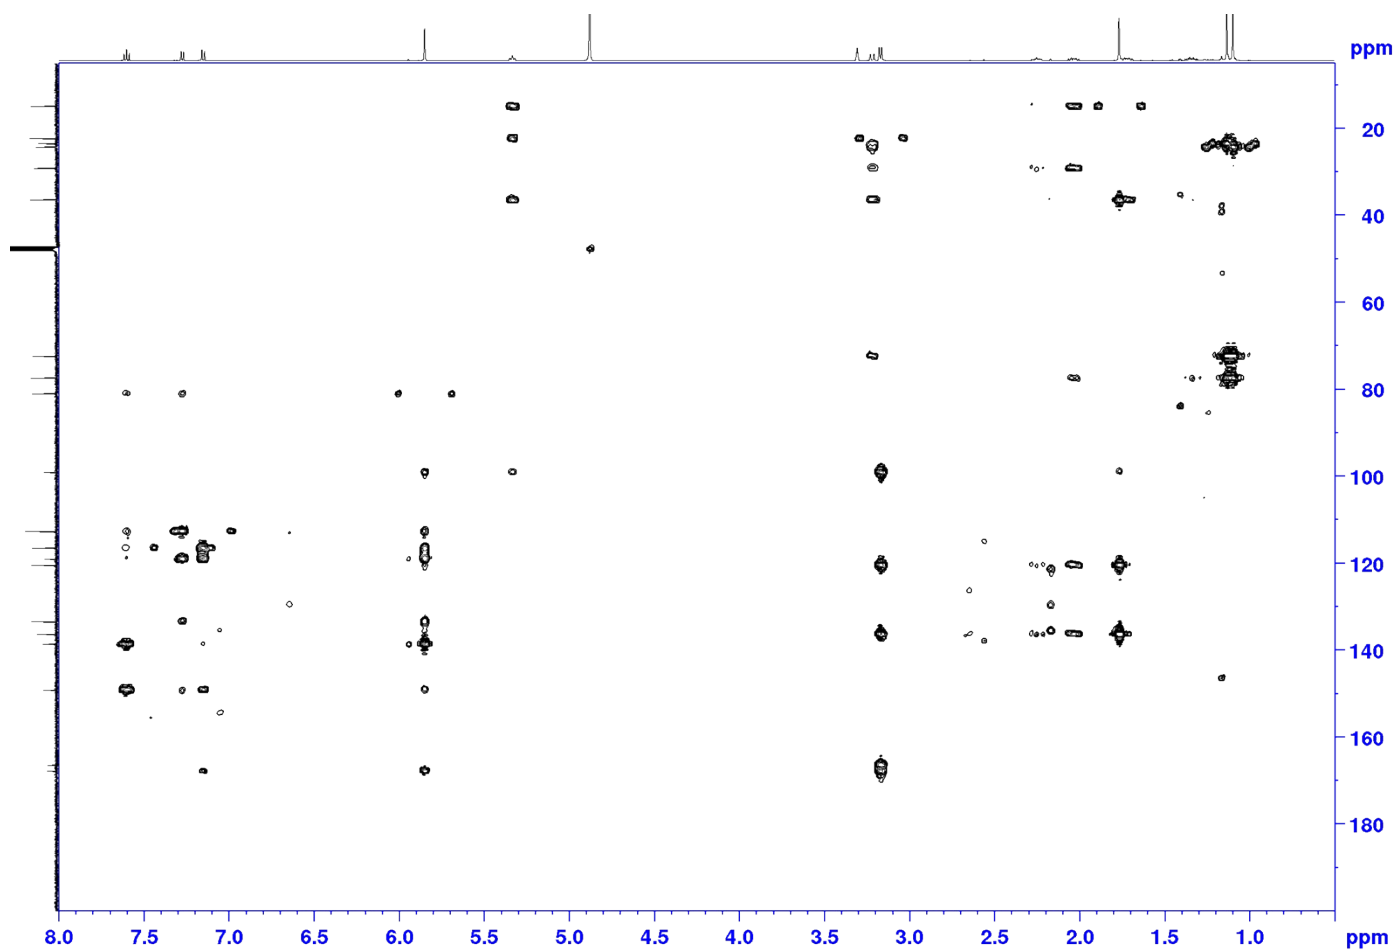

Figure S54. HMBC spectrum of *Gerberdriasin E (5)* in  $\text{CD}_3\text{OD}$

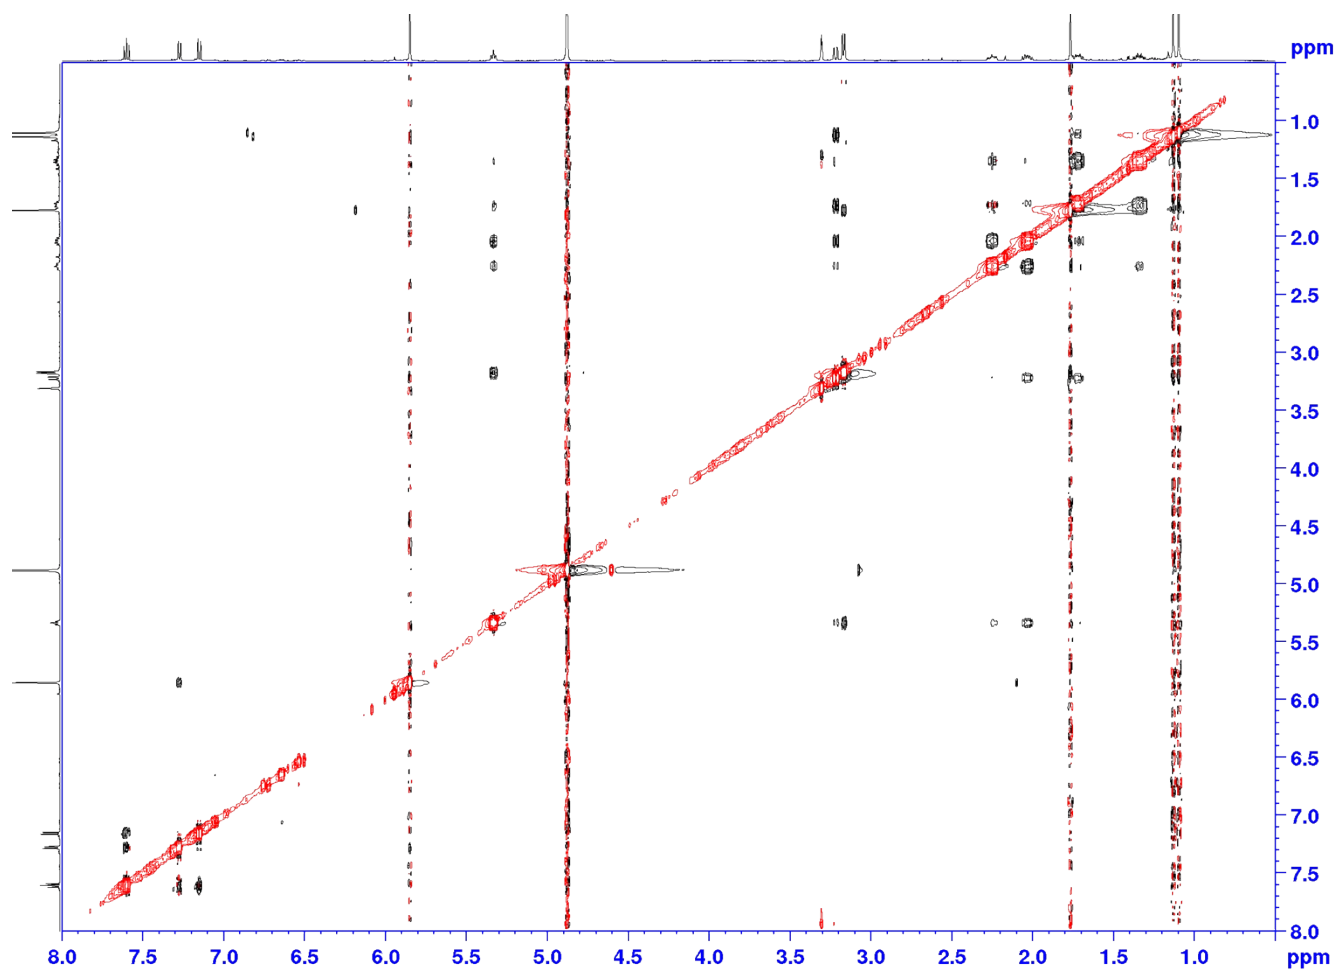

Figure S55. NOESY spectrum of *Gerberdriasin E (5)* in CD<sub>3</sub>OD

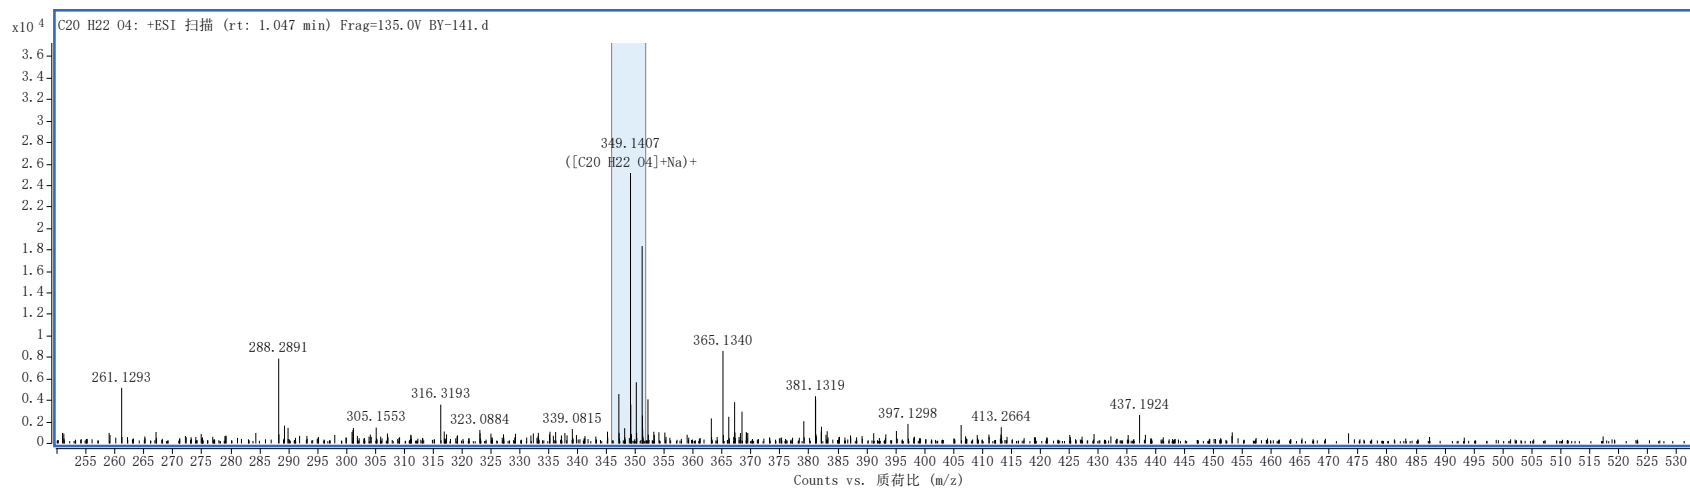

| 峰高总百分比 (Calc) | 峰高 (计算值) | 峰高百分数(计算值) | m/z (Calc) | Diff (mDa) | 峰高      | 峰高百分数 | 峰高总百分比 | m/z      | Diff (ppm) |
|---------------|----------|------------|------------|------------|---------|-------|--------|----------|------------|
| 81.9          | 25291.4  | 100        | 349.141    | 0.3        | 25171.2 | 100   | 81.6   | 349.1407 | 1          |

| 最佳   | ID 来源 | 分子式                                            | 种类                  | m/z      | 分数    | Diff (ppm) | 分数 (MFG) |
|------|-------|------------------------------------------------|---------------------|----------|-------|------------|----------|
| TRUE | MFG   | C <sub>20</sub> H <sub>22</sub> O <sub>4</sub> | (M+Na) <sup>+</sup> | 349.1407 | 84.32 | 0.83       | 84.32    |

**Figure S56. HRESIMS spectrum of *Gerberdriasin F* (6)**

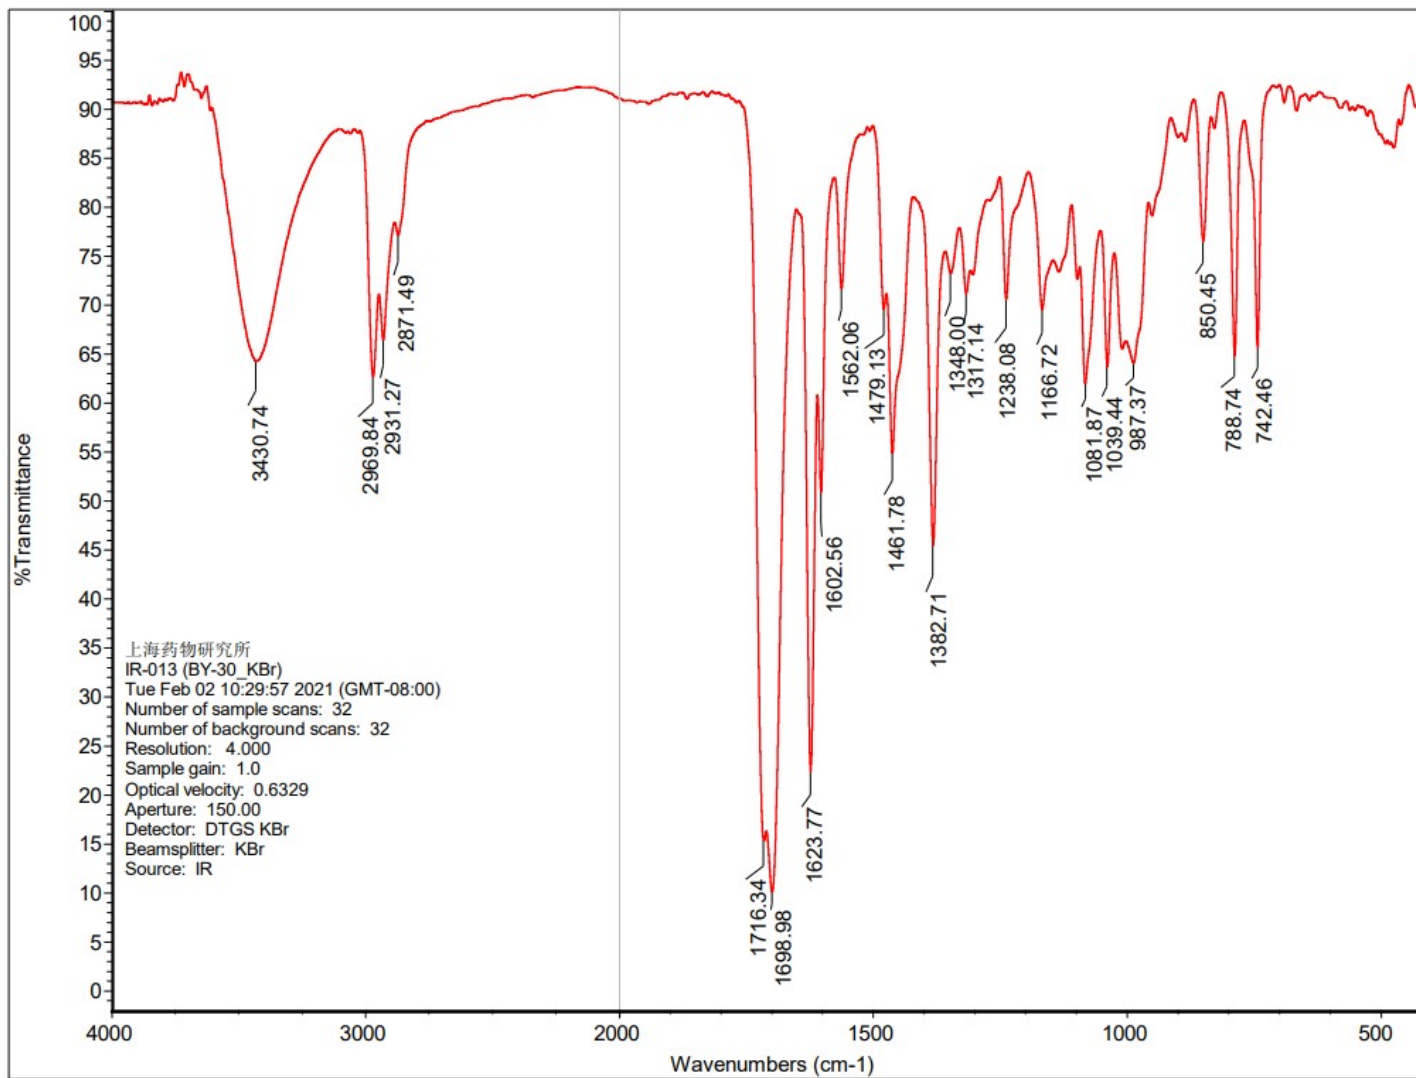

Figure S57. IR spectrum of Gerberdriasin F (6)

**Rudolph Research Analytical**

Thursday, 02/24/2022

This sample was measured on an Autopol VI, serial number 90079,  
manufactured by Rudolph Research Analytical, Hackettstown, NJ.

LotID : BY-141  
Set Temperature : 20.0  
Temp Corr : OFF

| <b>n</b>    | <b>Average</b>   | <b>Std.Dev.</b> | <b>Maximum</b> | <b>Minimum</b> |                 |            |              |              |              |                |
|-------------|------------------|-----------------|----------------|----------------|-----------------|------------|--------------|--------------|--------------|----------------|
| 6           | -9.167           | 1.8634          | -5.000         | -10.000        |                 |            |              |              |              |                |
| <b>S.No</b> | <b>Sample ID</b> | <b>Time</b>     | <b>Result</b>  | <b>Scale</b>   | <b>OR ° Arc</b> | <b>WLG</b> | <b>Lg.mm</b> | <b>Conc.</b> | <b>Temp.</b> | <b>Comment</b> |
| 1           | BY-141           | 11:02:54 AM     | -10.000        | SR             | -0.002          | 589        | 100.00       | 0.020        | 19.7         |                |
| 2           | BY-141           | 11:03:00 AM     | -10.000        | SR             | -0.002          | 589        | 100.00       | 0.020        | 19.7         |                |
| 3           | BY-141           | 11:03:06 AM     | -10.000        | SR             | -0.002          | 589        | 100.00       | 0.020        | 19.7         |                |
| 4           | BY-141           | 11:03:12 AM     | -10.000        | SR             | -0.002          | 589        | 100.00       | 0.020        | 19.7         |                |
| 5           | BY-141           | 11:03:17 AM     | -10.000        | SR             | -0.002          | 589        | 100.00       | 0.020        | 19.7         |                |
| 6           | BY-141           | 11:03:23 AM     | -5.000         | SR             | -0.001          | 589        | 100.00       | 0.020        | 19.8         |                |

\_\_\_\_\_  
Signature

**Figure S58. OR Value of *Gerberdriasin F (6)* in CH<sub>3</sub>OH**

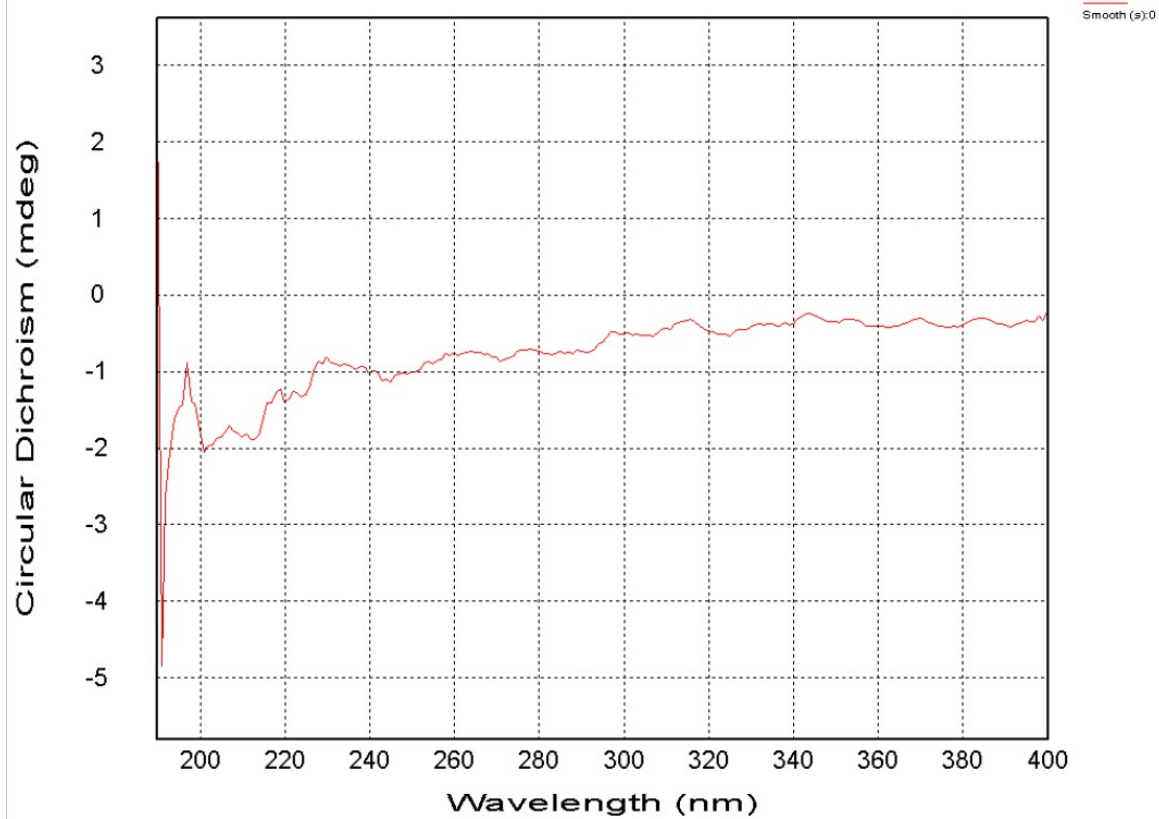

Figure S59. CD spectra of *Gerberdriasin F (6)* in CH<sub>3</sub>OH

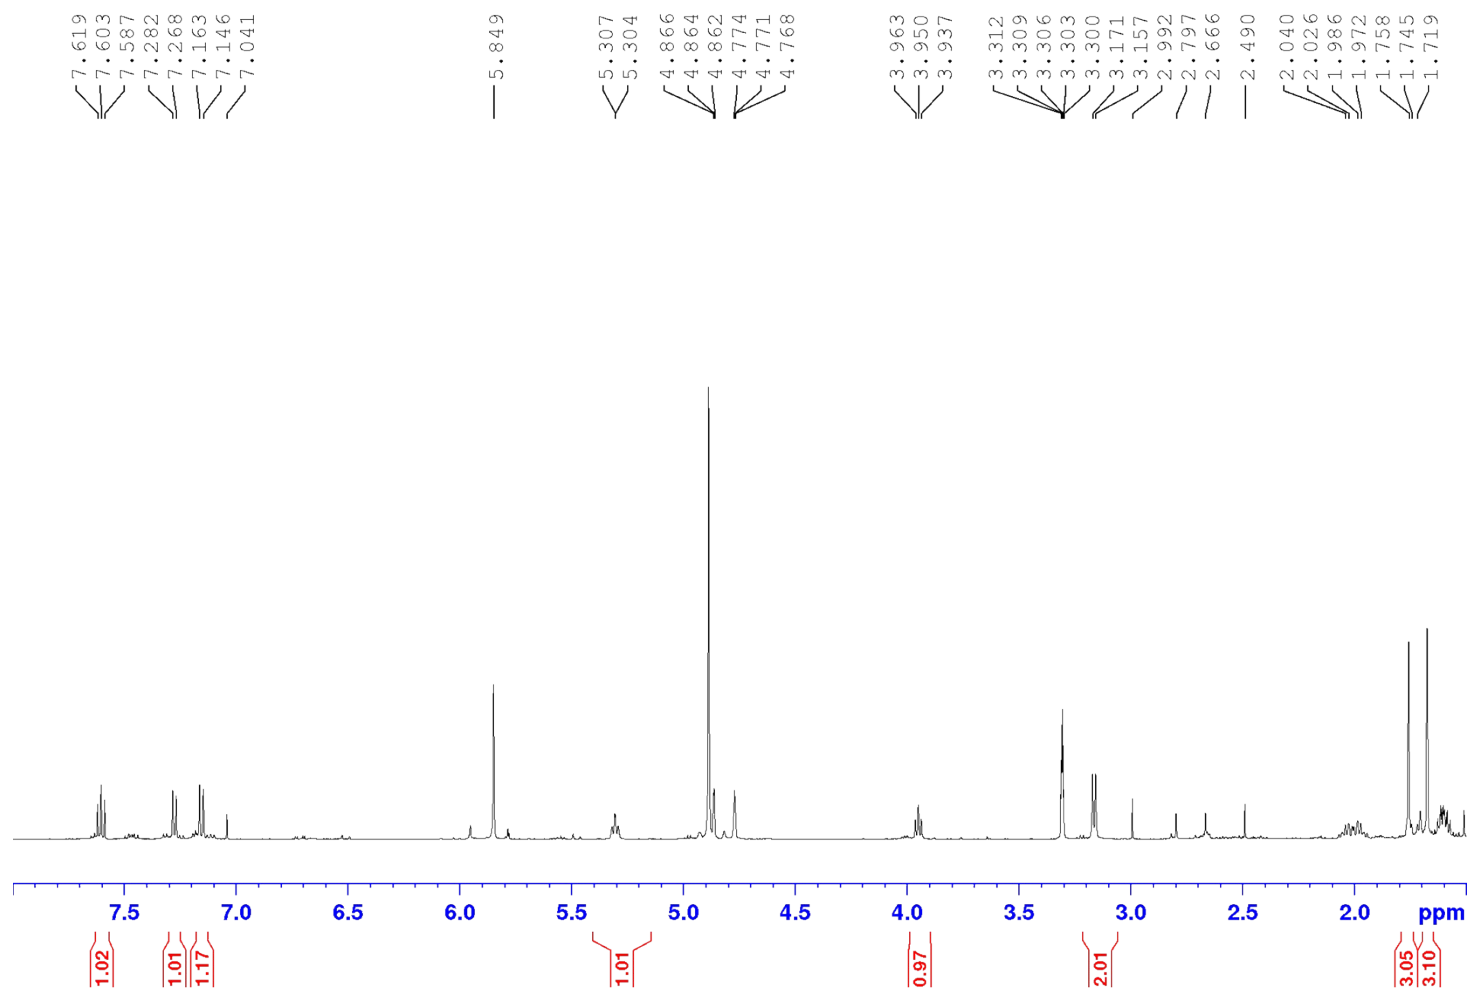

Figure S60.  $^1\text{H}$  NMR spectrum of *Gerberdriasin F (6)* in  $\text{CD}_3\text{OD}$



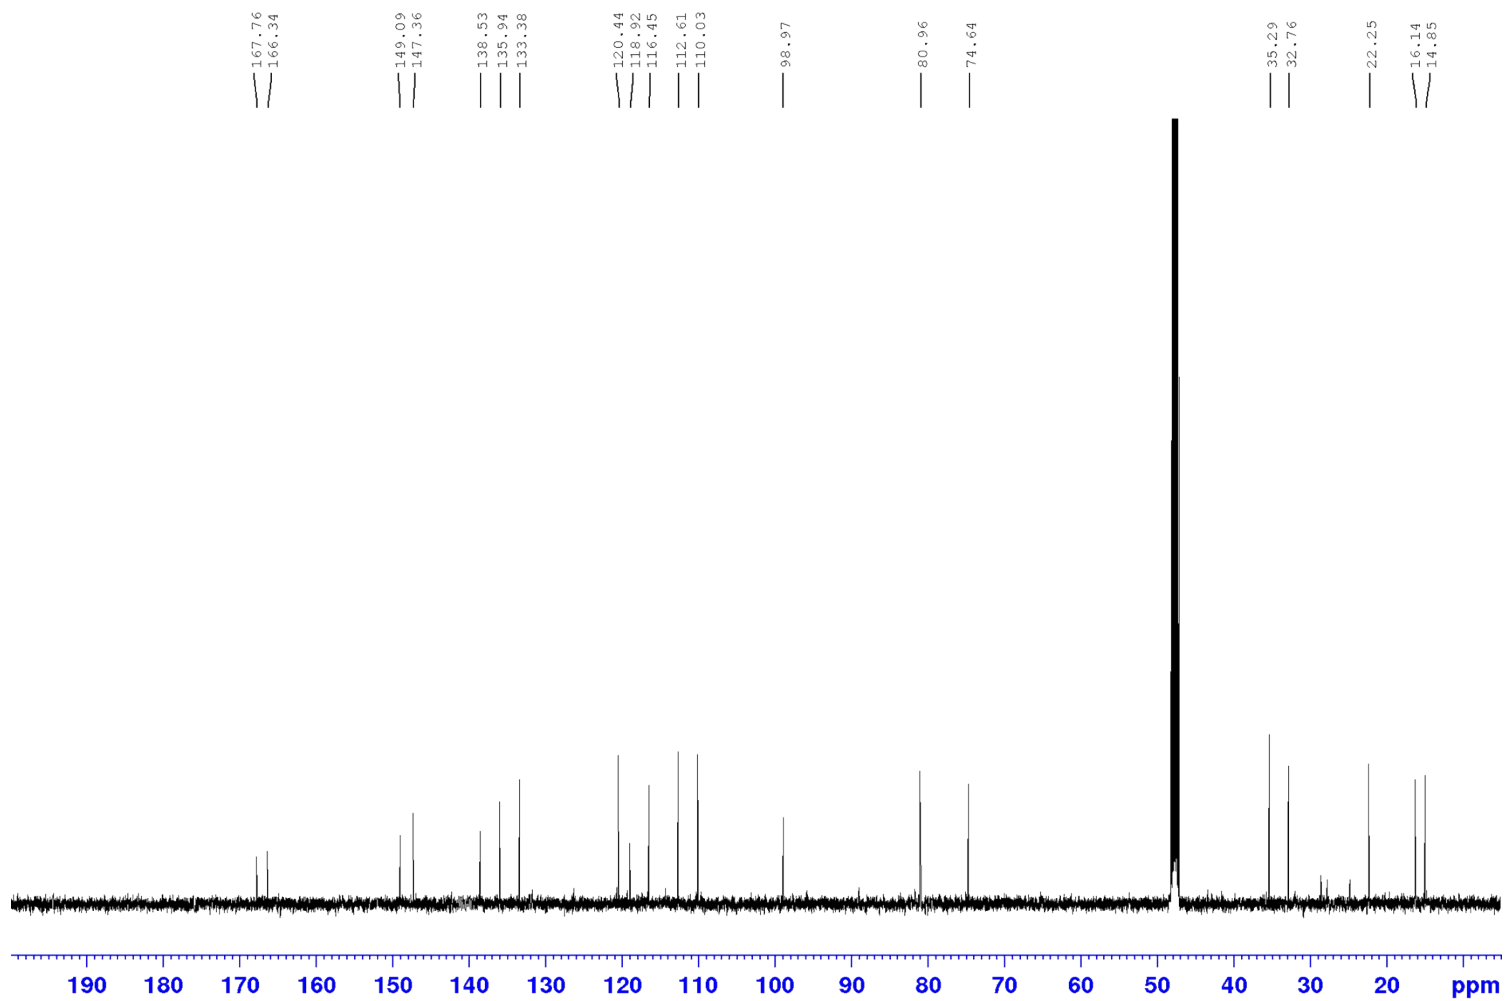

Figure S61.  $^{13}\text{C}$  NMR spectrum of *Gerberdriasin F (6)* in  $\text{CD}_3\text{OD}$

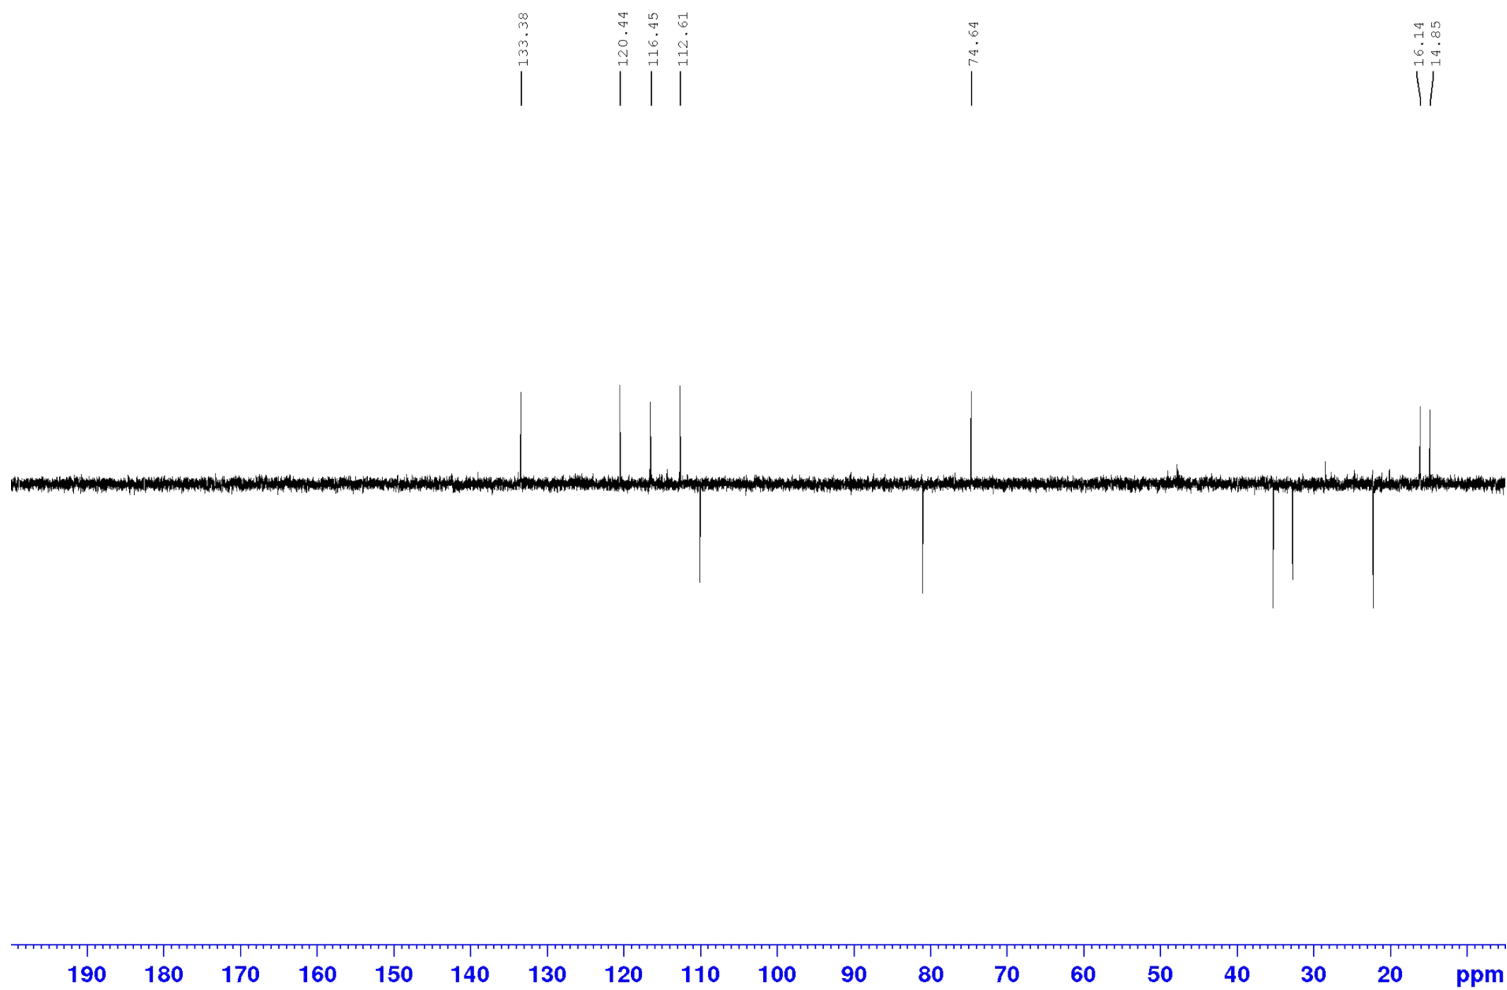

Figure S62. DEPT-135 NMR spectrum of *Gerberdriasin F (6)* in CD<sub>3</sub>OD

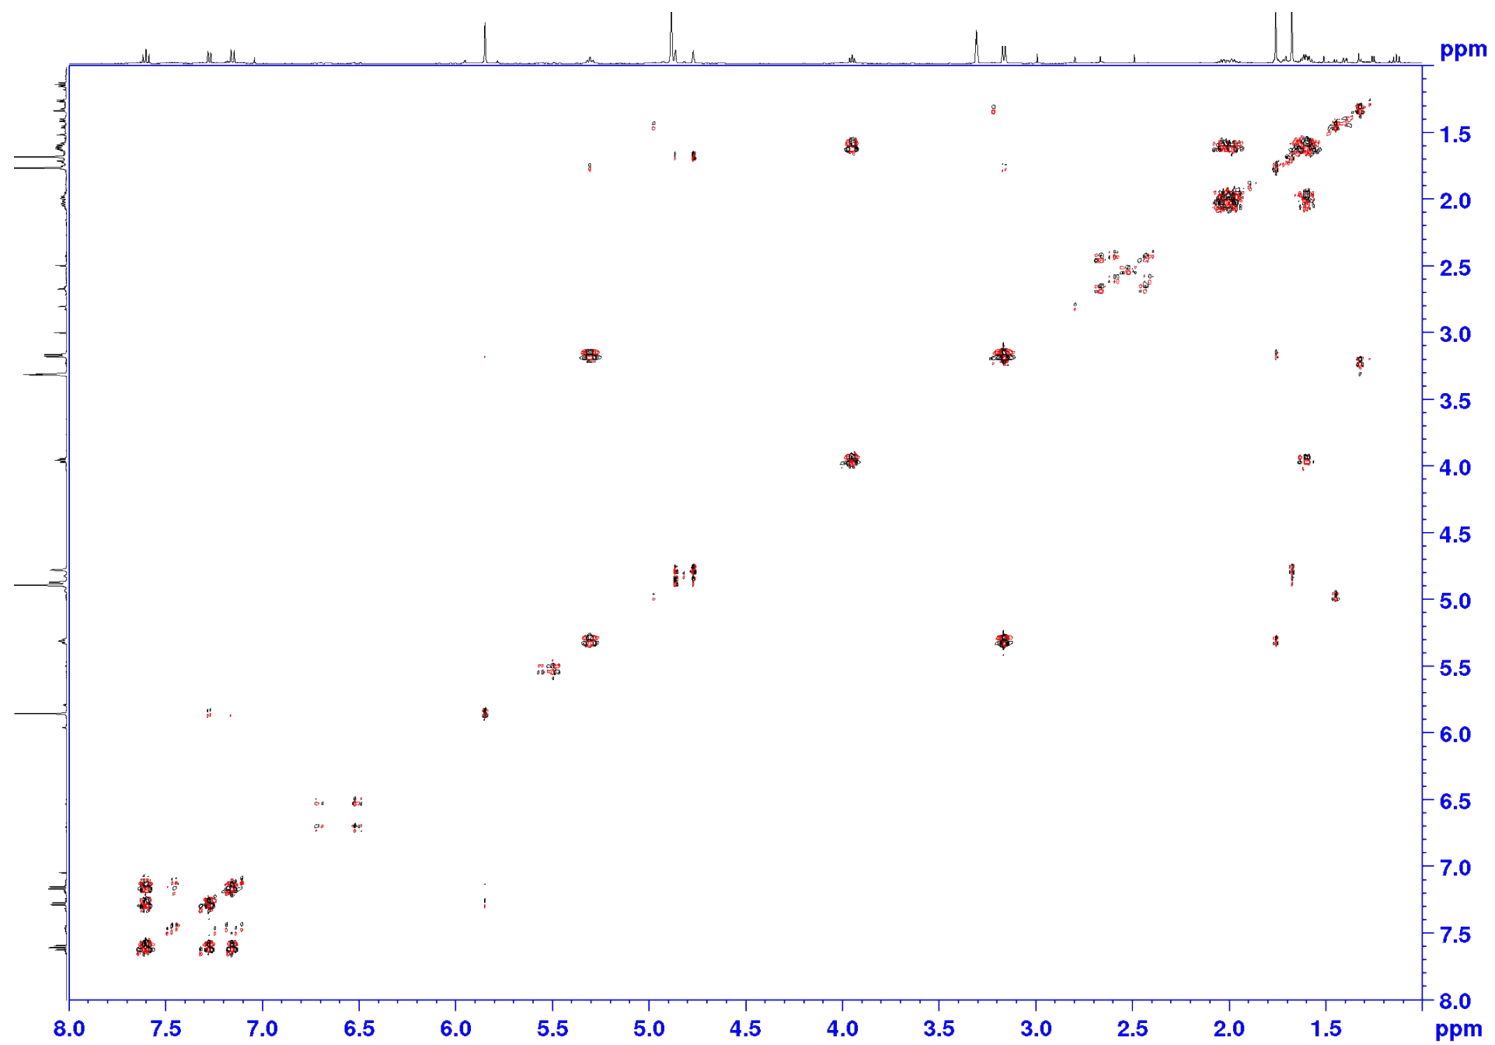

Figure S63.  $^1\text{H}$ - $^1\text{H}$  COSY spectrum of *Gerberdriasin F* (6) in  $\text{CD}_3\text{OD}$

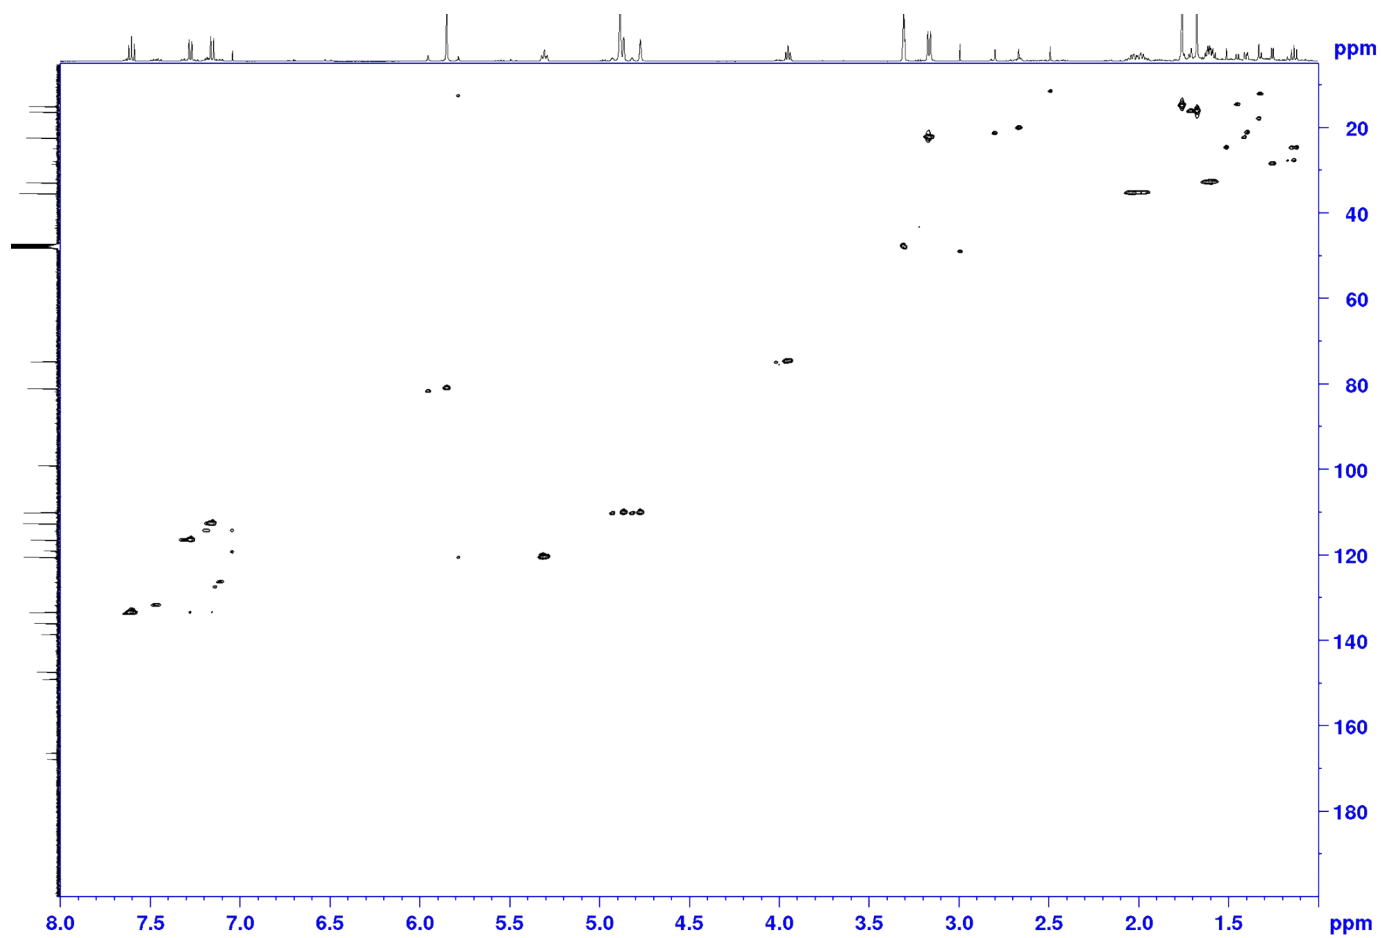

Figure S64. HSQC spectrum of *Gerberdriasin F (6)* in  $\text{CD}_3\text{OD}$

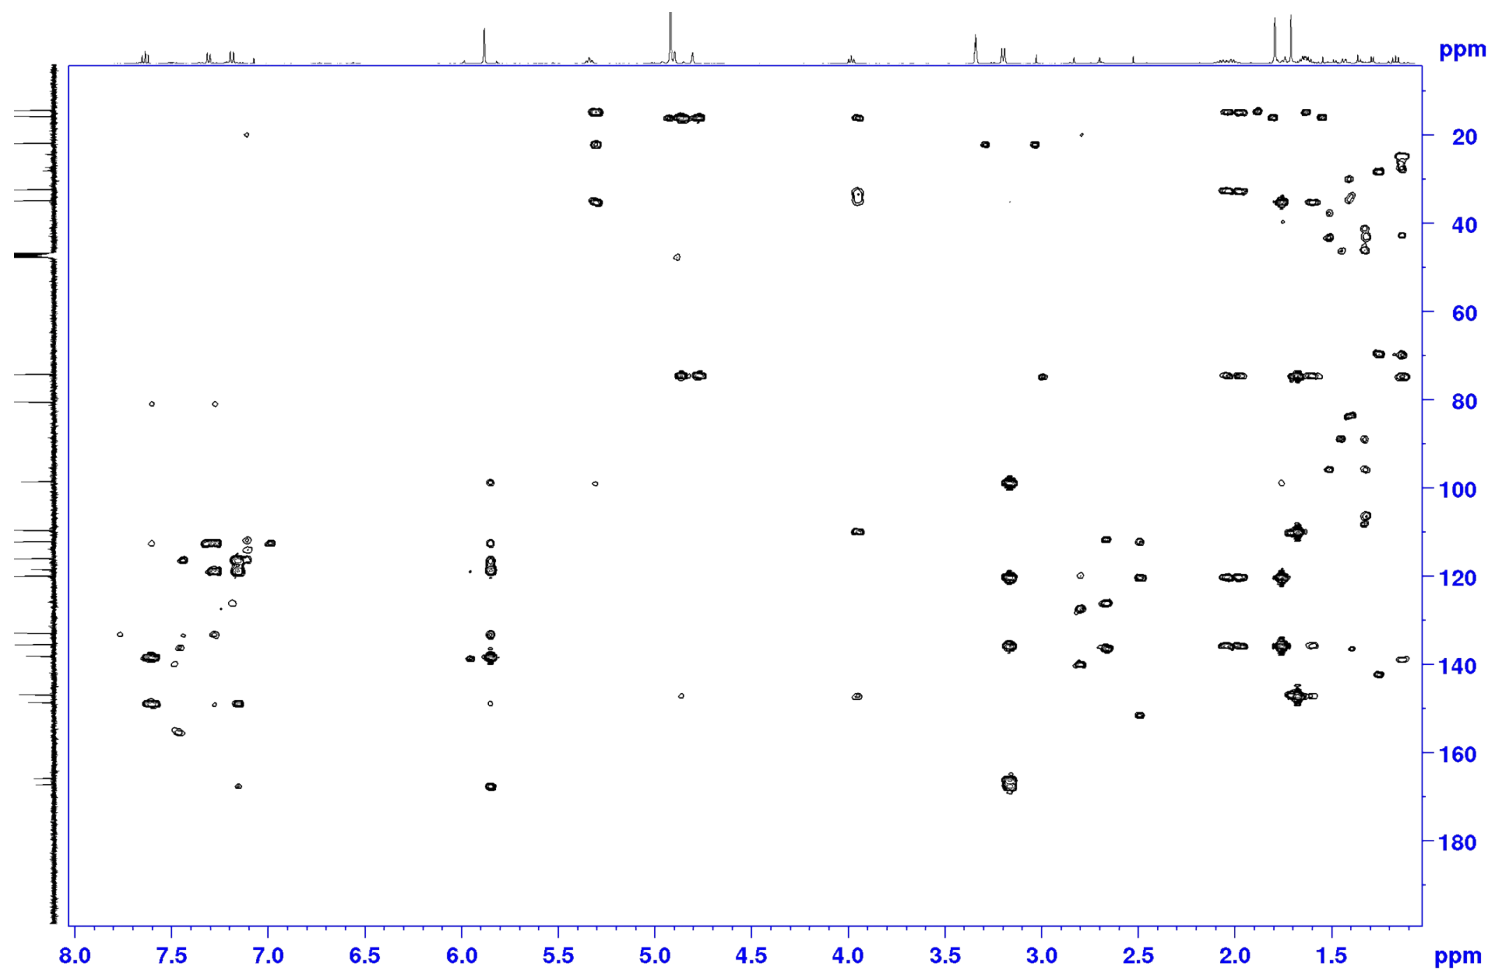

Figure S65. HMBC spectrum of *Gerberdriasin F (6)* in  $\text{CD}_3\text{OD}$

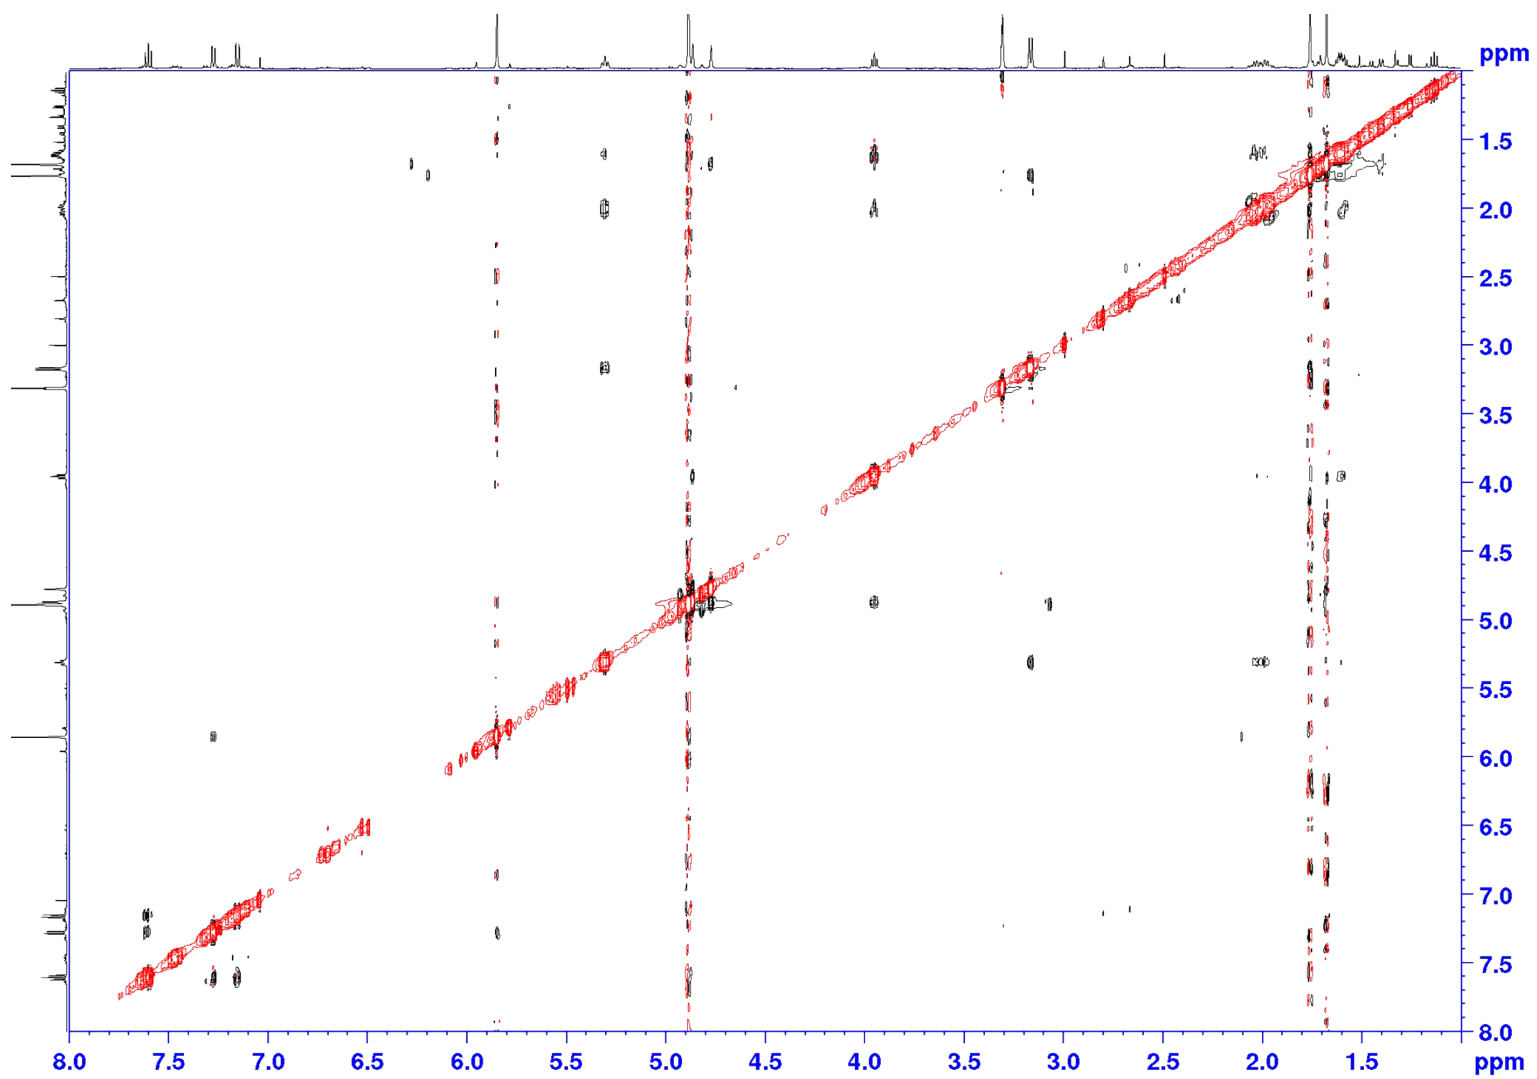

Figure S66. NOESY spectrum of *Gerberdriasin F (6)* in CD<sub>3</sub>OD

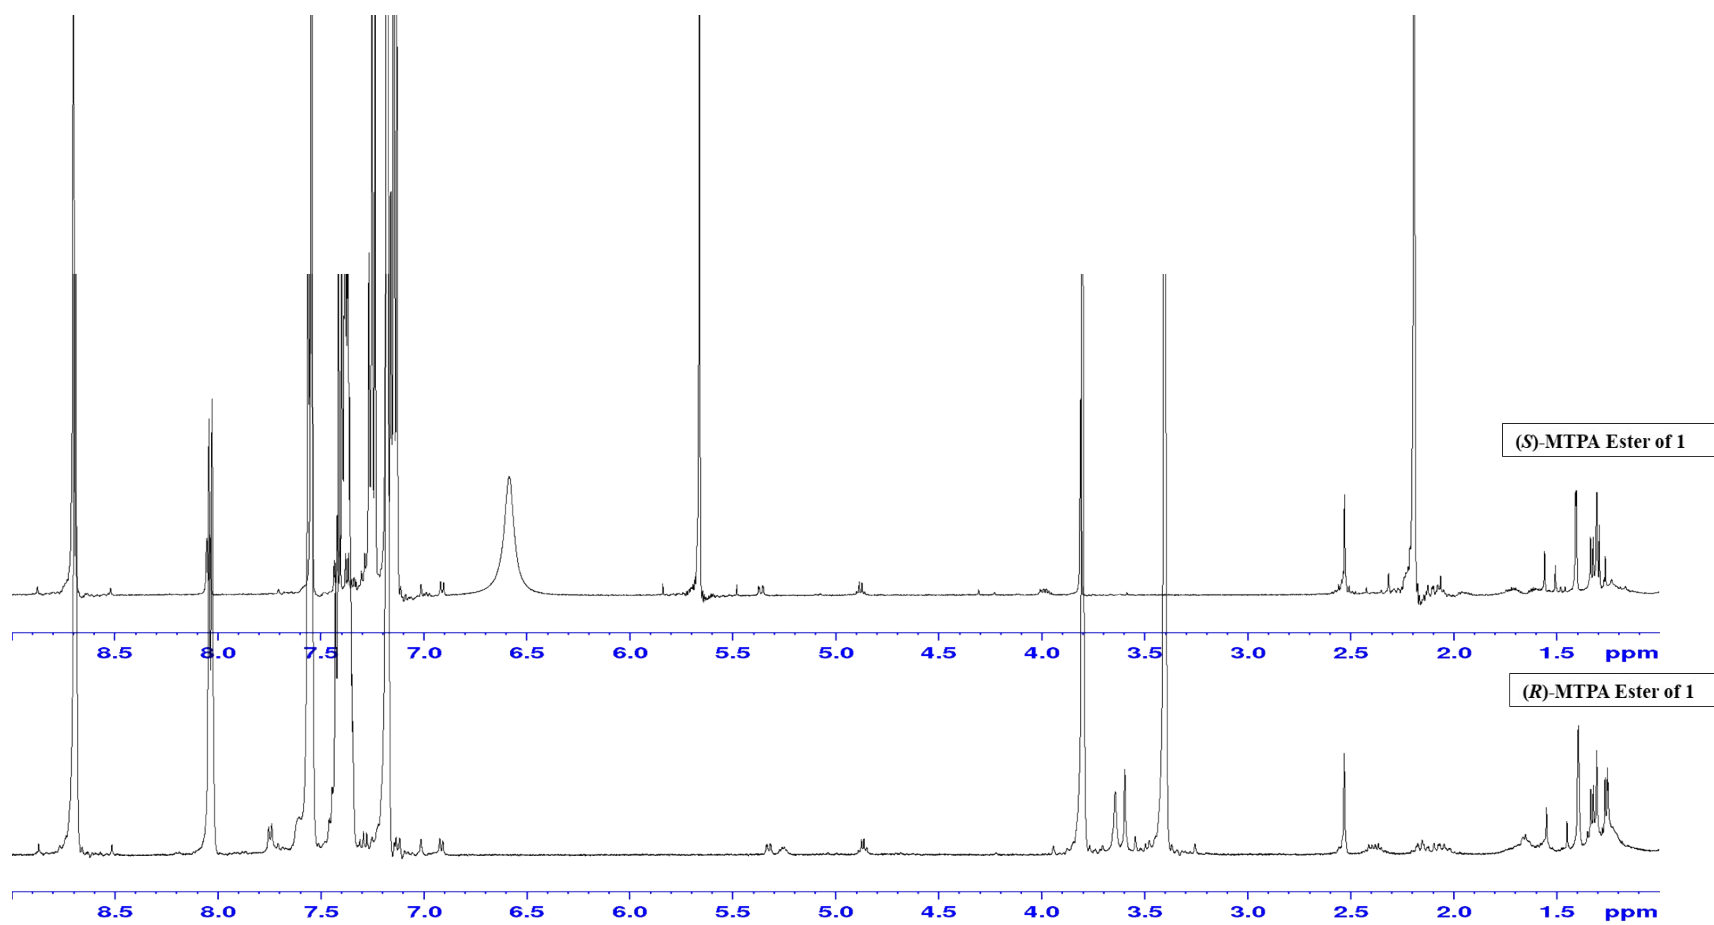

Figure S67: Chemical shift differences ( $\Delta\delta_H$  (*S-R*)) between (*S*)-MTPA and (*R*)-MTPA of 1.

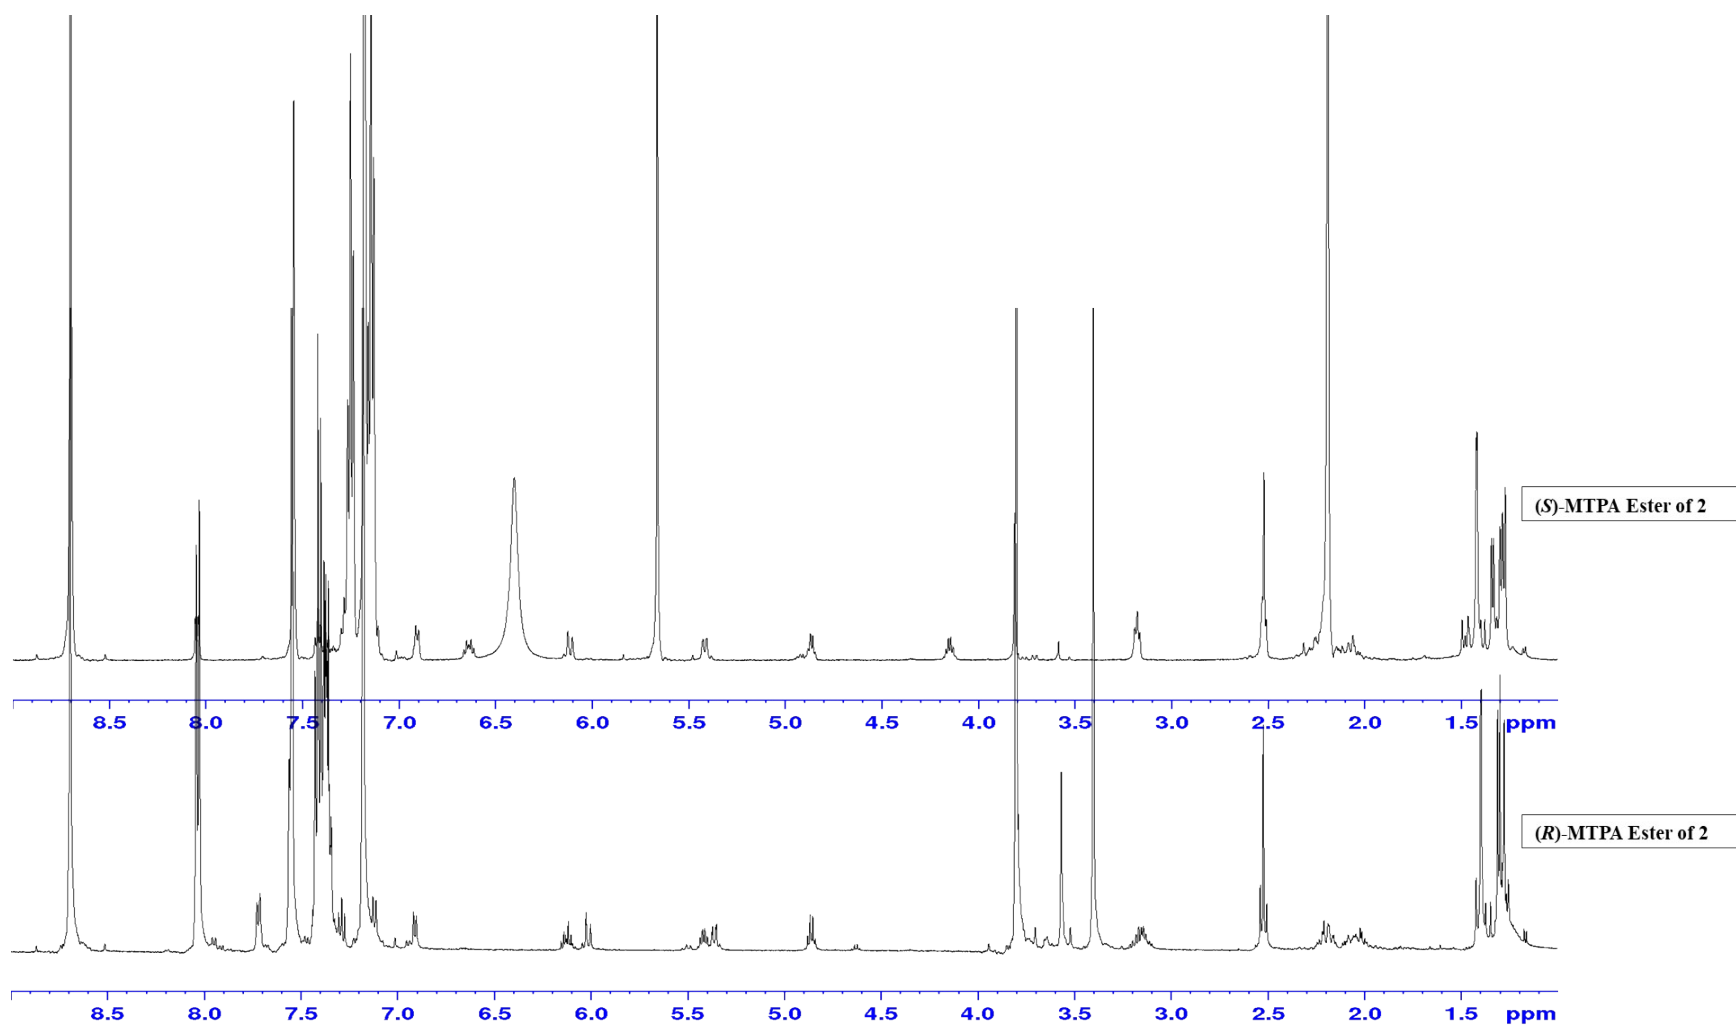

Figure S68: Chemical shift differences ( $\Delta\delta_{\text{H}}(S-R)$ ) between (S)-MTPA and (R)-MTPA of 2.



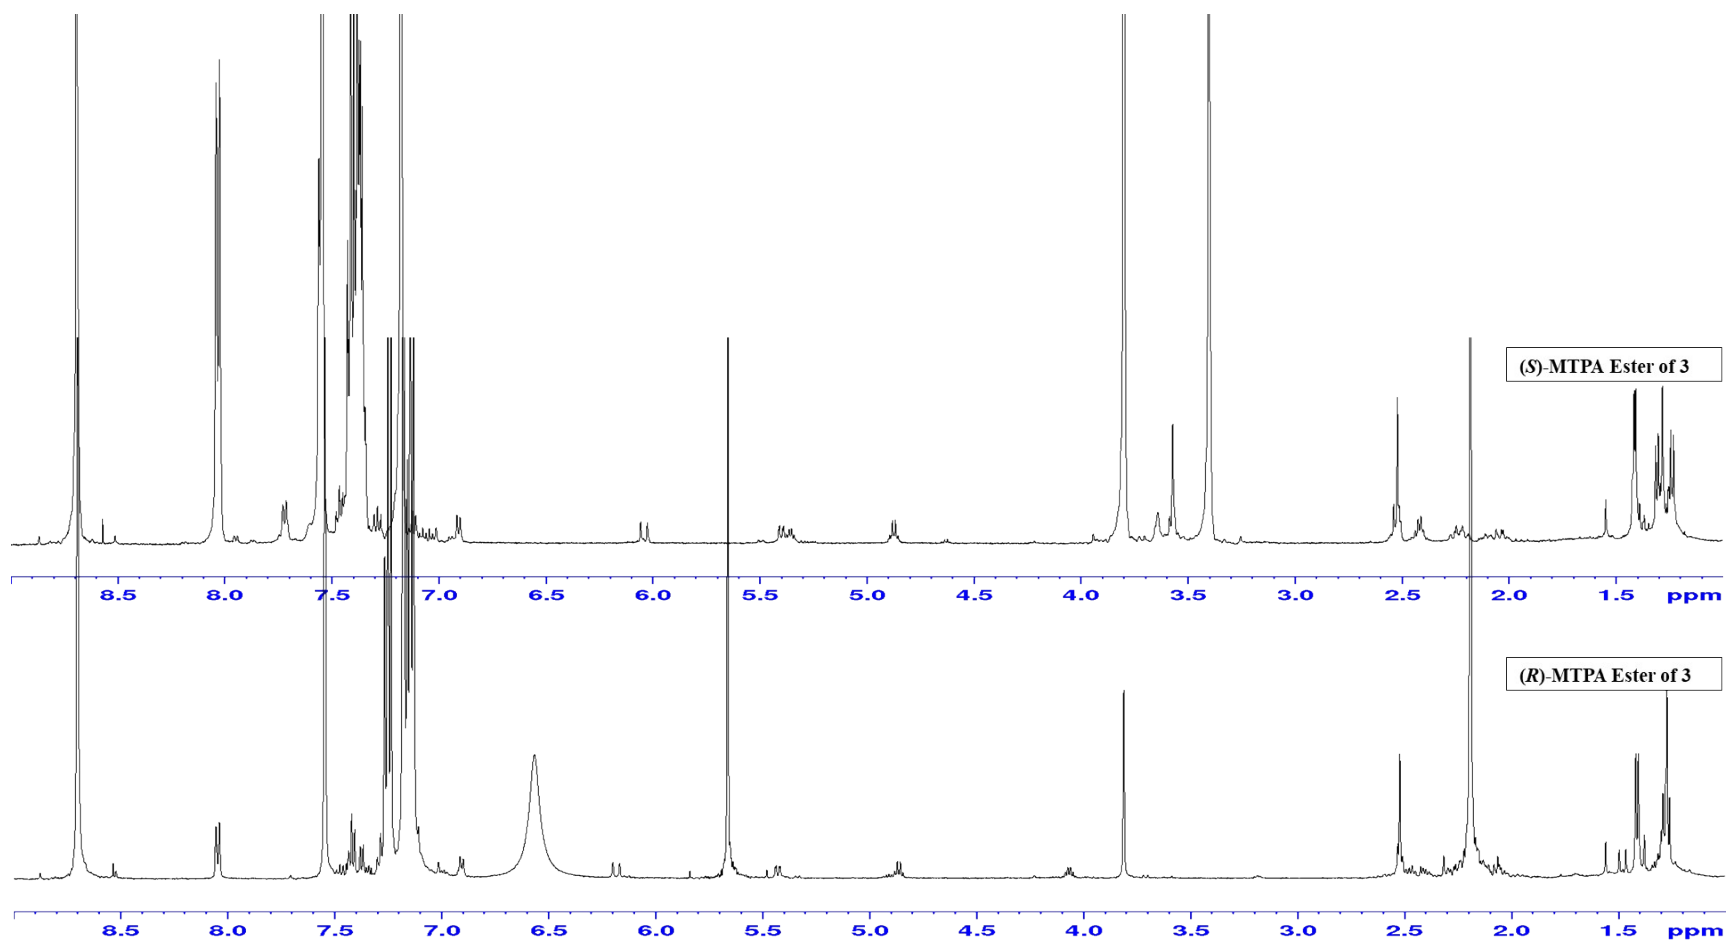

Figure S69: Chemical shift differences ( $\Delta\delta_{\text{H}}$  (*S-R*)) between (*S*)-MTPA and (*R*)-MTPA of 3.

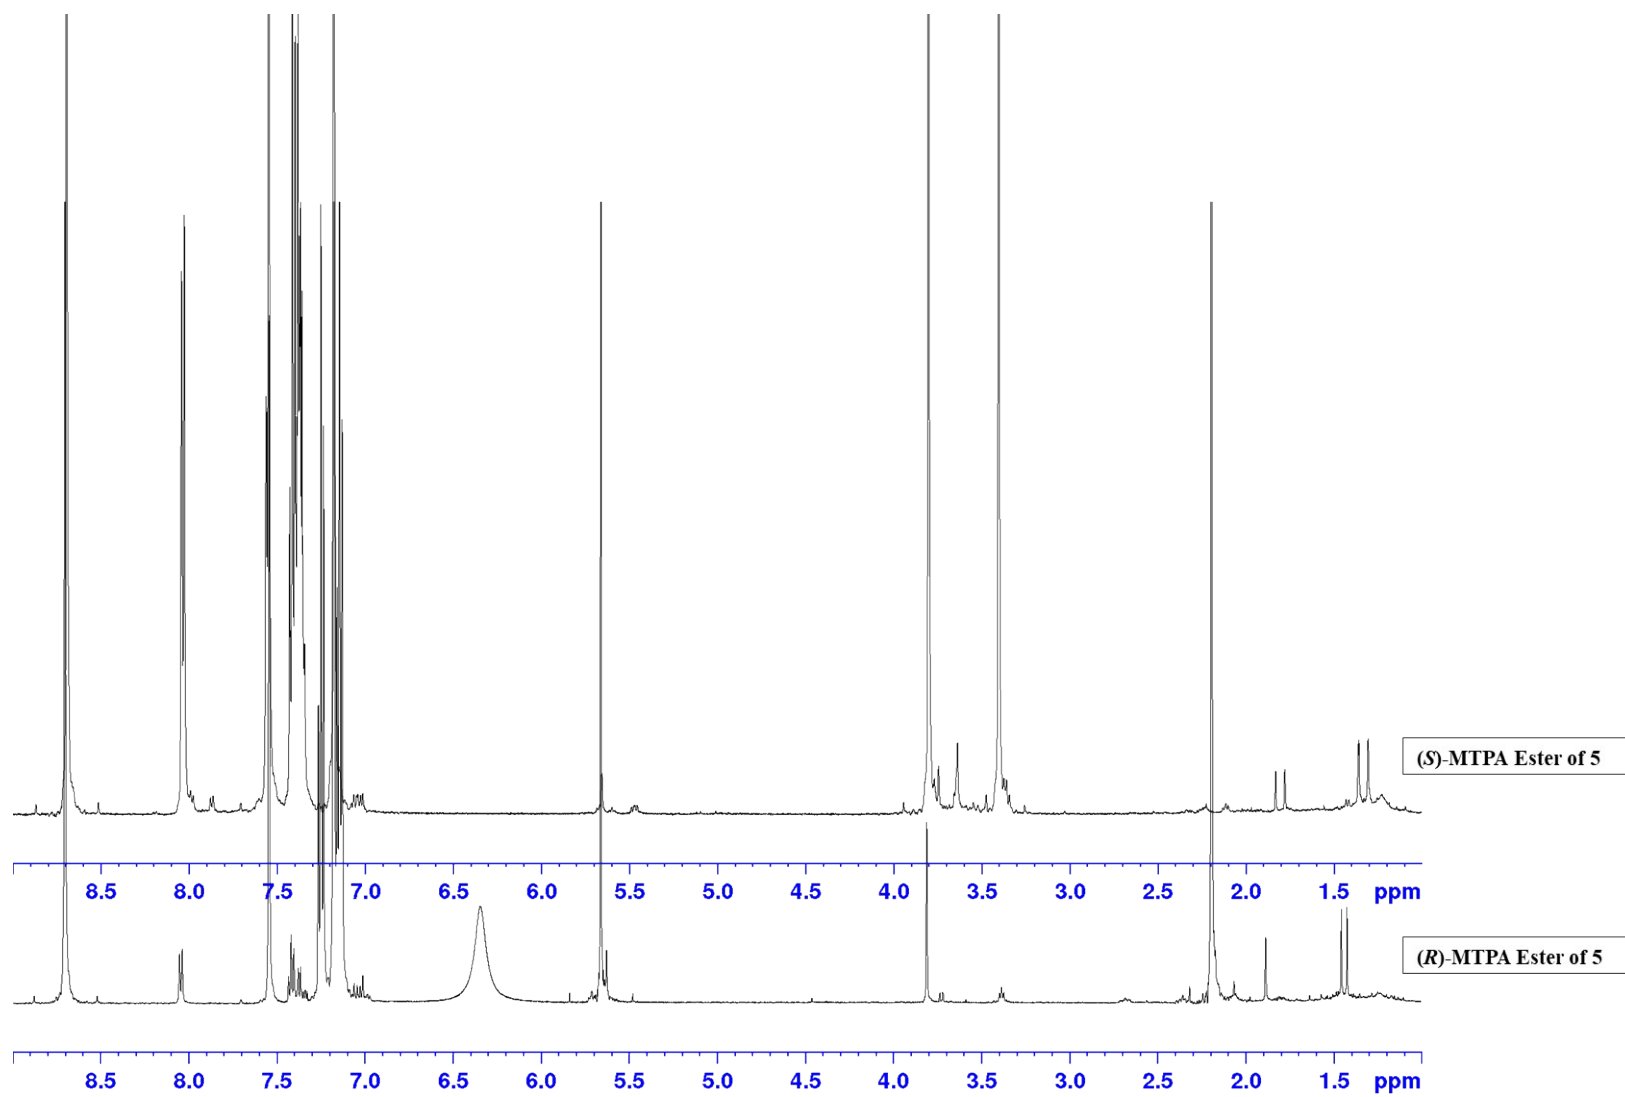

Figure S70: Chemical shift differences ( $\Delta\delta_H$  (*S-R*)) between (*S*)-MTPA and (*R*)-MTPA of 5.
